# Supplementary material for: Apolipoprotein E (ApoE) Rescues the Contractile Smooth Muscle Cell Phenotype in Popliteal Artery Aneurysm Disease
Source: Biomolecules. 2023 Jul 4;13(7):1074. doi: 10.3390/biom13071074 (PMC10377618; doi:10.3390/biom13071074)
Supplement: Supplementary file 1 [file biomolecules-13-01074-s001.zip › SupplTable3.xlsx]

## Sheet: aneurysmavs control ohne B
Affy.ID	logFC	AveExpr	t	P.Value	adj.P.Val	gene.symbol	gene.name
11734311_s_at	-6.21922	10.9837	-42.9402	2.0986e-05	0.132667	CNN1	calponin 1, basic, smooth muscle
11719657_a_at	6.47661	10.5773	41.2452	2.37715e-05	0.132667	MMP9	matrix metallopeptidase 9 (gelatinase B, 92kDa gelatinase, 92kDa type IV collagenase)
11757373_x_at	5.8638	10.2183	39.634	2.68907e-05	0.132667	APOC1	apolipoprotein C-I
11756074_a_at	5.6441	8.86177	39.534	2.71019e-05	0.132667	MMP7	matrix metallopeptidase 7 (matrilysin, uterine)
11732178_a_at	-5.54942	11.5128	-36.8382	3.37199e-05	0.132667	MYH11	myosin, heavy chain 11, smooth muscle
11732179_x_at	-5.20191	11.9448	-36.5979	3.44096e-05	0.132667	MYH11	myosin, heavy chain 11, smooth muscle
11744031_at	5.5286	8.65504	36.233	3.54928e-05	0.132667	MMP7	matrix metallopeptidase 7 (matrilysin, uterine)
11723645_at	-5.17364	10.3226	-34.0759	4.29122e-05	0.132667	PLN	phospholamban
11754604_x_at	4.97751	11.9406	31.2451	5.61087e-05	0.132667	SPP1	secreted phosphoprotein 1
11717986_a_at	5.67092	10.674	31.0508	5.72013e-05	0.132667	APOC1	apolipoprotein C-I
11721688_at	-4.19283	9.69808	-29.7642	6.51937e-05	0.132667	ID4	inhibitor of DNA binding 4, dominant negative helix-loop-helix protein
11746506_a_at	5.24871	11.5286	29.4494	6.73713e-05	0.132667	SPP1	secreted phosphoprotein 1
11725744_x_at	-4.92263	10.2194	-28.9851	7.07619e-05	0.132667	SORBS1	sorbin and SH3 domain containing 1
11734310_a_at	-4.75684	10.7992	-28.8401	7.18672e-05	0.132667	CNN1	calponin 1, basic, smooth muscle
11744068_x_at	4.83405	11.0637	28.2764	7.63859e-05	0.132667	APOE	apolipoprotein E
11744251_a_at	-4.10438	9.66879	-28.0444	7.83553e-05	0.132667	ITGA8	integrin, alpha 8
11717994_a_at	-4.09855	10.4798	-27.9991	7.87473e-05	0.132667	NR4A1	nuclear receptor subfamily 4, group A, member 1
11719121_a_at	-4.79823	10.6163	-27.8953	7.96564e-05	0.132667	PPP1R14A	protein phosphatase 1, regulatory (inhibitor) subunit 14A
11721687_at	-3.86509	9.69972	-27.444	8.37726e-05	0.132667	ID4	inhibitor of DNA binding 4, dominant negative helix-loop-helix protein
11721602_a_at	-3.97272	9.86969	-27.2904	8.52376e-05	0.132667	SYNPO2	synaptopodin 2
11755606_x_at	3.97922	11.3078	27.1491	8.6615e-05	0.132667	IFI30 /// PIK3R2	interferon, gamma-inducible protein 30 /// phosphoinositide-3-kinase, regulatory subunit 2 (beta)
11745722_x_at	-4.14066	11.0704	-26.6114	9.21347e-05	0.132667	FHL1	four and a half LIM domains 1
11727790_x_at	4.17017	12.0798	26.0748	9.81156e-05	0.132667	SPP1	secreted phosphoprotein 1
11755757_a_at	-3.85137	10.1618	-26.0639	9.82423e-05	0.132667	SYNM	synemin, intermediate filament protein
11744030_a_at	6.38574	8.86172	25.9481	9.96032e-05	0.132667	MMP7	matrix metallopeptidase 7 (matrilysin, uterine)
11717123_a_at	-4.60333	10.2487	-25.9417	9.96781e-05	0.132667	PPP1R12B	protein phosphatase 1, regulatory subunit 12B
11745393_x_at	3.73264	8.41423	25.5156	0.000104907	0.132667	APOC2	apolipoprotein C-II
11729238_a_at	-3.69561	9.26678	-25.4314	0.000105983	0.132667	CSRP2	cysteine and glycine-rich protein 2
11742922_at	3.52777	11.532	25.1213	0.000110075	0.132667	LAPTM5	lysosomal protein transmembrane 5
11729371_a_at	-3.51342	8.73563	-24.9616	0.000112263	0.132667	ZBTB16	zinc finger and BTB domain containing 16
11727140_a_at	-4.89093	10.0883	-24.9184	0.000112865	0.132667	MUSTN1 /// TMEM110-MUSTN1	musculoskeletal, embryonic nuclear protein 1 /// TMEM110-MUSTN1 readthrough
11718605_a_at	-4.00606	8.91893	-24.908	0.000113011	0.132667	SCRG1	stimulator of chondrogenesis 1
11727601_a_at	-3.48934	9.61253	-24.5185	0.000118643	0.132667	WFDC1	WAP four-disulfide core domain 1
11729239_x_at	-3.75358	9.05803	-24.3141	0.000121748	0.132667	CSRP2	cysteine and glycine-rich protein 2
11762012_at	-3.57932	8.4533	-24.1866	0.00012374	0.132667	MYH11	myosin, heavy chain 11, smooth muscle
11721757_at	-3.59965	9.52984	-23.9815	0.000127034	0.132667	TMEM47	transmembrane protein 47
11716716_x_at	3.42995	11.651	23.8593	0.000129053	0.132667	CTSB	cathepsin B
11717575_at	-3.74461	9.90239	-23.8315	0.000129517	0.132667	PPP1R3C	protein phosphatase 1, regulatory subunit 3C
11737428_a_at	3.43816	9.12213	23.7847	0.000130306	0.132667	MSR1	macrophage scavenger receptor 1
11736190_a_at	-3.53048	9.43229	-23.6195	0.000133138	0.132667	OGN	osteoglycin
11725237_a_at	-3.46946	9.15204	-23.5254	0.000134787	0.132667	RBPMS2	RNA binding protein with multiple splicing 2
11729741_x_at	3.2774	9.94442	23.3049	0.000138762	0.132667	CD68	CD68 molecule
11736191_s_at	-3.33926	10.6275	-23.0486	0.000143576	0.132667	OGN	osteoglycin
11736044_a_at	-3.26994	9.48128	-23.0468	0.000143611	0.132667	MYH10	myosin, heavy chain 10, non-muscle
11718243_a_at	-3.20215	9.72676	-22.7492	0.000149484	0.132667	ITGA7	integrin, alpha 7
11754390_s_at	-3.84771	9.14052	-22.6395	0.000151729	0.132667	MIR143HG /// MIR145	MIR143 host gene (non-protein coding) /// microRNA 145
11737944_x_at	5.66934	11.8871	22.5907	0.000152742	0.132667	SPP1	secreted phosphoprotein 1
11725742_a_at	-3.746	10.6055	-22.5304	0.000154006	0.132667	SORBS1	sorbin and SH3 domain containing 1
11718016_a_at	-3.24572	9.84512	-22.4798	0.000155077	0.132667	ADARB1	adenosine deaminase, RNA-specific, B1
11725743_s_at	-4.54859	9.5058	-22.4529	0.000155653	0.132667	SORBS1	sorbin and SH3 domain containing 1
11717981_a_at	3.34098	9.23121	22.4525	0.00015566	0.132667	ACP5	acid phosphatase 5, tartrate resistant
11724589_s_at	6.42893	9.42638	22.361	0.000157634	0.132667	MMP12	matrix metallopeptidase 12 (macrophage elastase)
11715775_a_at	-3.17167	8.92803	-22.3147	0.000158645	0.132667	HSPB8	heat shock 22kDa protein 8
11715793_a_at	-4.98023	9.86967	-22.1433	0.00016246	0.132667	ACTG2	actin, gamma 2, smooth muscle, enteric
11756898_a_at	-3.19788	9.36098	-21.8682	0.000168845	0.132667	PGM5	phosphoglucomutase 5
11718119_s_at	-3.25296	9.84861	-21.7594	0.000171462	0.132667	CFL2	cofilin 2 (muscle)
11756947_a_at	3.46851	12.6272	21.4753	0.00017855	0.132667	CTSB	cathepsin B
11717103_s_at	-3.11567	8.92581	-21.2392	0.000184737	0.132667	SLC38A1	solute carrier family 38, member 1
11718435_a_at	-2.99764	8.5497	-21.1946	0.000185939	0.132667	NPNT	nephronectin
11719671_a_at	-3.98194	9.63858	-20.9699	0.000192147	0.132667	RCAN2	regulator of calcineurin 2
11743475_a_at	2.96889	8.94468	20.9616	0.000192383	0.132667	ITGAX	integrin, alpha X (complement component 3 receptor 4 subunit)
11748655_x_at	-4.10075	11.0368	-20.77	0.000197903	0.132667	FHL1	four and a half LIM domains 1
11757507_s_at	-2.93536	7.79556	-20.4881	0.000206413	0.132667	DSP	desmoplakin
11748518_a_at	-3.05117	11.0139	-20.4569	0.000207385	0.132667	CSRP1	cysteine and glycine-rich protein 1
11723111_a_at	3.17794	9.14326	20.3481	0.00021082	0.132667	EMILIN2	elastin microfibril interfacer 2
11717980_x_at	-2.866	9.27486	-20.2609	0.000213625	0.132667	C7	complement component 7
11715588_x_at	-3.28826	12.1381	-20.1566	0.000217051	0.132667	MYL9	myosin, light chain 9, regulatory
11742309_x_at	-2.84985	9.54974	-20.1518	0.000217209	0.132667	TPM1	tropomyosin 1 (alpha)
11754084_x_at	-3.13929	11.1287	-20.054	0.000220489	0.132667	MYL9	myosin, light chain 9, regulatory
11733818_x_at	-3.97714	11.1808	-20.0221	0.000221572	0.132667	FHL1	four and a half LIM domains 1
11724983_at	-2.8715	9.5193	-19.9497	0.000224057	0.132667	PCDH7	protocadherin 7
11715794_x_at	-5.38801	10.4645	-19.8901	0.000226132	0.132667	ACTG2	actin, gamma 2, smooth muscle, enteric
11735572_x_at	-3.37143	9.85077	-19.8745	0.000226678	0.132667	SORBS2	sorbin and SH3 domain containing 2
11757502_x_at	-3.85989	8.86406	-19.8537	0.000227412	0.132667	SCRG1	stimulator of chondrogenesis 1
11731172_s_at	-3.13811	8.94215	-19.8492	0.000227569	0.132667	GLDN	gliomedin
11729887_at	-2.78416	8.38956	-19.8311	0.000228211	0.132667	PTPLA	protein tyrosine phosphatase-like (proline instead of catalytic arginine), member A
11717885_a_at	-3.75449	10.133	-19.8029	0.000229211	0.132667	CCDC3	coiled-coil domain containing 3
11745392_a_at	3.83959	8.14682	19.6829	0.000233541	0.132667	APOC2 /// APOC4 /// APOC4-APOC2	apolipoprotein C-II /// apolipoprotein C-IV /// APOC4-APOC2 readthrough
11755730_x_at	5.52731	11.8683	19.5537	0.000238325	0.132667	SPP1	secreted phosphoprotein 1
11754821_s_at	-2.82899	9.15966	-19.4776	0.000241205	0.132667	SLC38A1	solute carrier family 38, member 1
11721304_at	-3.28824	9.44622	-19.4155	0.000243586	0.132667	RAMP1	receptor (G protein-coupled) activity modifying protein 1
11724804_x_at	2.71984	8.53496	19.3703	0.000245341	0.132667	LAIR1	leukocyte-associated immunoglobulin-like receptor 1
11737943_a_at	5.58648	12.1994	19.3466	0.000246268	0.132667	SPP1	secreted phosphoprotein 1
11724402_s_at	2.73115	7.88723	19.3323	0.00024683	0.132667	HS3ST2	heparan sulfate (glucosamine) 3-O-sulfotransferase 2
11749564_a_at	-3.02802	11.2302	-19.2496	0.000250109	0.132667	EFEMP1	EGF containing fibulin-like extracellular matrix protein 1
11755182_a_at	-2.77914	9.52958	-19.1921	0.000252425	0.132667	FILIP1L	filamin A interacting protein 1-like
11724459_x_at	-2.87855	10.5009	-19.0228	0.000259401	0.132667	MCAM	melanoma cell adhesion molecule
11735570_a_at	-4.08824	10.0616	-18.9384	0.000262974	0.132667	SORBS2	sorbin and SH3 domain containing 2
11746087_a_at	2.71098	7.37151	18.9275	0.000263441	0.132667	CD84	CD84 molecule
11718118_s_at	-3.18827	9.07434	-18.8377	0.000267324	0.132667	CFL2	cofilin 2 (muscle)
11735571_a_at	-3.41469	9.30531	-18.8125	0.00026843	0.132667	SORBS2	sorbin and SH3 domain containing 2
11733115_a_at	2.73603	8.25141	18.7283	0.000272163	0.132667	CA2	carbonic anhydrase II
11737429_x_at	3.61042	9.11792	18.7133	0.000272831	0.132667	MSR1	macrophage scavenger receptor 1
11718974_at	3.857	8.73881	18.6559	0.000275424	0.132667	LPL	lipoprotein lipase
11733817_s_at	-3.28427	11.5686	-18.5732	0.000279216	0.132667	FHL1	four and a half LIM domains 1
11716715_a_at	3.62711	12.6084	18.495	0.000282861	0.132667	CTSB	cathepsin B
11758869_at	-2.71151	7.87526	-18.4487	0.000285052	0.132667	ACTA2	actin, alpha 2, smooth muscle, aorta
11719983_a_at	-2.60198	9.66623	-18.4014	0.000287314	0.132667	INPP5A	inositol polyphosphate-5-phosphatase, 40kDa
11749242_a_at	-2.79708	9.18687	-18.3553	0.000289538	0.132667	SMOC2	SPARC related modular calcium binding 2
11717676_a_at	-2.95632	9.50772	-18.2242	0.000295993	0.132667	CYFIP2	cytoplasmic FMR1 interacting protein 2
11739194_s_at	-2.57713	9.78567	-18.2145	0.000296477	0.132667	SLMAP	sarcolemma associated protein
11718576_s_at	-2.64851	9.38096	-18.1911	0.000297652	0.132667	NET1	neuroepithelial cell transforming 1
11754493_a_at	-2.97246	11.3854	-18.1486	0.000299802	0.132667	CSRP1	cysteine and glycine-rich protein 1
11750623_a_at	-2.83286	9.47513	-18.0295	0.000305935	0.132667	FILIP1L	filamin A interacting protein 1-like
11759565_a_at	-3.19421	8.54586	-17.9618	0.000309493	0.132667	SPEG	SPEG complex locus
11726485_at	-3.48841	9.63278	-17.8378	0.00031616	0.132667	CPED1	cadherin-like and PC-esterase domain containing 1
11754375_s_at	2.52314	8.00087	17.8238	0.000316921	0.132667	SNX10	sorting nexin 10
11746476_x_at	-2.70595	9.7093	-17.8077	0.000317804	0.132667	CALD1	caldesmon 1
11722165_a_at	-3.9591	10.6144	-17.7297	0.000322123	0.132667	RGS5	regulator of G-protein signaling 5
11743881_s_at	3.33814	7.97244	17.7218	0.000322564	0.132667	MREG	melanoregulin
11736559_a_at	-2.48848	8.72472	-17.6886	0.000324432	0.132667	MAP2	microtubule-associated protein 2
11719393_a_at	2.4906	7.88849	17.6586	0.000326129	0.132667	NR1H3	nuclear receptor subfamily 1, group H, member 3
11732480_s_at	3.80447	8.85517	17.6323	0.000327626	0.132667	ITGAM	integrin, alpha M (complement component 3 receptor 3 subunit)
11721491_a_at	3.44152	8.23491	17.6185	0.000328412	0.132667	FBP1	fructose-1,6-bisphosphatase 1
11731555_at	-4.9365	10.691	-17.59	0.000330053	0.132667	SYNPO2	synaptopodin 2
11740326_x_at	-3.45755	9.73228	-17.5899	0.000330059	0.132667	SORBS2	sorbin and SH3 domain containing 2
11719876_at	-2.98441	8.19965	-17.4292	0.000339504	0.132667	CKMT2	creatine kinase, mitochondrial 2 (sarcomeric)
11724252_s_at	2.67884	8.59623	17.4087	0.000340733	0.132667	SLC39A8	solute carrier family 39 (zinc transporter), member 8
11732790_a_at	-2.75461	8.21885	-17.362	0.000343559	0.132667	PRDM16	PR domain containing 16
11724738_a_at	4.85804	9.16485	17.3425	0.000344746	0.132667	CD36	CD36 molecule (thrombospondin receptor)
11754068_a_at	-2.98353	10.7611	-17.2986	0.000347441	0.132667	CSRP1	cysteine and glycine-rich protein 1
11724401_at	2.60571	7.77203	17.1862	0.000354475	0.132667	HS3ST2	heparan sulfate (glucosamine) 3-O-sulfotransferase 2
11754202_a_at	3.86879	10.4396	17.0821	0.000361155	0.132667	CAPG	capping protein (actin filament), gelsolin-like
11754681_s_at	2.41822	9.72045	17.0755	0.000361584	0.132667	HLA-DMB	major histocompatibility complex, class II, DM beta
11756089_s_at	3.38834	8.02345	17.0447	0.000363592	0.132667	MSR1	macrophage scavenger receptor 1
11753923_at	-2.39227	8.79903	-16.9704	0.00036851	0.132667	MBNL1-AS1	MBNL1 antisense RNA 1
11724102_s_at	-2.47189	8.61767	-16.9501	0.000369864	0.132667	PDZRN3	PDZ domain containing ring finger 3
11736375_a_at	2.38074	8.35355	16.9253	0.000371535	0.132667	CD86	CD86 molecule
11721615_a_at	2.38079	9.32867	16.8557	0.000376265	0.132667	THEMIS2	thymocyte selection associated family member 2
11756096_a_at	-2.36739	8.60244	-16.8359	0.000377629	0.132667	SLC25A4	solute carrier family 25 (mitochondrial carrier; adenine nucleotide translocator), member 4
11727253_at	-2.53413	8.36313	-16.8264	0.000378283	0.132667	TCEAL2	transcription elongation factor A (SII)-like 2
11746309_a_at	2.52261	9.57525	16.8078	0.000379572	0.132667	SLC15A3	solute carrier family 15, member 3
11720338_at	-2.41007	9.80415	-16.8036	0.000379861	0.132667	FIBIN	fin bud initiation factor homolog (zebrafish)
11758652_s_at	-2.76352	10.386	-16.753	0.000383396	0.132667	KANK1	KN motif and ankyrin repeat domains 1
11726063_a_at	-3.1599	9.15522	-16.74	0.000384312	0.132667	C2orf40	chromosome 2 open reading frame 40
11717049_s_at	-2.61454	10.7567	-16.7397	0.000384334	0.132667	DES /// SUPT20H	desmin /// suppressor of Ty 20 homolog (S. cerevisiae)
11758229_s_at	2.34366	8.07396	16.6778	0.00038873	0.132667	GREM1	gremlin 1, DAN family BMP antagonist
11719029_at	3.43507	9.1748	16.652	0.000390586	0.132667	PIK3AP1	phosphoinositide-3-kinase adaptor protein 1
11721947_a_at	-2.74725	8.74666	-16.6349	0.000391817	0.132667	MRVI1	murine retrovirus integration site 1 homolog
11746588_a_at	-2.66598	9.72711	-16.6214	0.0003928	0.132667	ALDH1B1	aldehyde dehydrogenase 1 family, member B1
11730215_a_at	-3.10263	11.471	-16.5262	0.000399785	0.132667	CSRP1	cysteine and glycine-rich protein 1
11744277_x_at	3.85654	10.0964	16.5111	0.000400911	0.132667	CAPG	capping protein (actin filament), gelsolin-like
11754509_a_at	-2.32936	9.33738	-16.4978	0.000401908	0.132667	SORBS1	sorbin and SH3 domain containing 1
11742707_a_at	3.94233	8.30035	16.4737	0.000403711	0.132667	APOC2 /// APOC4 /// APOC4-APOC2	apolipoprotein C-II /// apolipoprotein C-IV /// APOC4-APOC2 readthrough
11720080_at	-2.58925	8.74856	-16.4452	0.000405863	0.132667	NTRK2	neurotrophic tyrosine kinase, receptor, type 2
11724221_at	-2.30752	8.19952	-16.4302	0.000407008	0.132667	NAP1L2	nucleosome assembly protein 1-like 2
11754984_s_at	-4.44557	10.7272	-16.3436	0.000413663	0.132667	MYH10	myosin, heavy chain 10, non-muscle
11727942_a_at	2.96433	8.47167	16.3209	0.000415436	0.132667	FPR3	formyl peptide receptor 3
11742745_a_at	2.38846	9.65413	16.3155	0.000415852	0.132667	LOC100509484 /// PLIN2	uncharacterized LOC100509484 /// perilipin 2
11740390_a_at	2.35086	7.82941	16.2584	0.000420355	0.132667	RBM47	RNA binding motif protein 47
11757798_s_at	2.83178	10.4522	16.1914	0.00042572	0.132667	MAFB	v-maf musculoaponeurotic fibrosarcoma oncogene homolog B (avian)
11725332_a_at	2.3619	11.2162	16.0909	0.000433931	0.132667	CTSL1	cathepsin L1
11720851_s_at	-2.25822	9.22788	-16.0557	0.000436862	0.132667	NFIA	nuclear factor I/A
11758263_s_at	2.25689	8.99277	16.0233	0.000439573	0.132667	CYBB	cytochrome b-245, beta polypeptide
11723223_at	-3.70707	9.50879	-16.015	0.000440274	0.132667	CASQ2	calsequestrin 2 (cardiac muscle)
11717873_x_at	2.55653	8.92715	16.011	0.00044061	0.132667	IRF8	interferon regulatory factor 8
11720704_s_at	-2.28551	8.94425	-15.9539	0.000445467	0.132667	TPD52L1	tumor protein D52-like 1
11754471_a_at	2.46408	8.16808	15.8572	0.000453856	0.132667	HLA-DMB	major histocompatibility complex, class II, DM beta
11720489_a_at	-5.80706	10.1603	-15.8446	0.000454971	0.132667	ACTC1	actin, alpha, cardiac muscle 1
11753010_x_at	-3.99695	11.1665	-15.8393	0.000455432	0.132667	FHL1	four and a half LIM domains 1
11726294_s_at	2.43421	7.90409	15.7541	0.000463033	0.132667	CEBPA	CCAAT/enhancer binding protein (C/EBP), alpha
11718241_a_at	-3.34359	9.90532	-15.7528	0.000463154	0.132667	PRUNE2	prune homolog 2 (Drosophila)
11743725_s_at	2.21952	11.3059	15.7235	0.000465804	0.132667	MFSD1	major facilitator superfamily domain containing 1
11718861_a_at	2.54982	8.2495	15.7171	0.000466389	0.132667	HCK	hemopoietic cell kinase
11720146_a_at	2.26419	8.63708	15.6561	0.000471985	0.132667	DAPK1	death-associated protein kinase 1
11757553_x_at	-2.2616	9.21112	-15.6146	0.00047584	0.132667	LTBP4	latent transforming growth factor beta binding protein 4
11758147_s_at	2.40804	7.48635	15.5758	0.00047949	0.132667	MAPK13	mitogen-activated protein kinase 13
11718651_at	-2.65535	8.92364	-15.5132	0.000485447	0.132667	TMTC1	transmembrane and tetratricopeptide repeat containing 1
11730813_at	4.05724	9.32472	15.4134	0.000495156	0.132667	LILRB4	leukocyte immunoglobulin-like receptor, subfamily B (with TM and ITIM domains), member 4
11730216_x_at	-3.13251	11.4379	-15.3526	0.000501196	0.132667	CSRP1	cysteine and glycine-rich protein 1
11757519_x_at	3.69232	10.3186	15.3473	0.000501718	0.132667	CAPG	capping protein (actin filament), gelsolin-like
11732479_a_at	3.04123	8.0842	15.3395	0.000502504	0.132667	ITGAM	integrin, alpha M (complement component 3 receptor 3 subunit)
11740579_a_at	-2.20389	8.34869	-15.2929	0.000507217	0.132667	NTRK3	neurotrophic tyrosine kinase, receptor, type 3
11733729_s_at	2.15131	10.5989	15.2901	0.000507504	0.132667	LGMN	legumain
11743968_a_at	2.93087	10.6681	15.2768	0.000508853	0.132667	CYBA	cytochrome b-245, alpha polypeptide
11748084_a_at	-2.27668	8.86151	-15.2592	0.000510658	0.132667	MFGE8	milk fat globule-EGF factor 8 protein
11718491_x_at	3.71182	9.29275	15.2522	0.000511374	0.132667	FABP5 /// LOC101060453	fatty acid binding protein 5 (psoriasis-associated) /// fatty acid-binding protein, epidermal-like
11742923_a_at	4.0175	10.9255	15.2426	0.000512362	0.132667	LAPTM5	lysosomal protein transmembrane 5
11755104_a_at	-2.25718	9.33984	-15.2274	0.000513931	0.132667	KIAA1671 /// LOC100996283	KIAA1671 /// uncharacterized LOC100996283
11718905_x_at	-2.77467	9.78842	-15.2239	0.000514293	0.132667	FILIP1L	filamin A interacting protein 1-like
11748141_a_at	-2.14053	10.1923	-15.1922	0.000517593	0.132667	CRIP2	cysteine-rich protein 2
11735039_s_at	2.23263	8.11638	15.1606	0.000520906	0.132667	KIAA1598	KIAA1598
11717872_a_at	2.14076	8.58983	15.1579	0.000521193	0.132667	IRF8	interferon regulatory factor 8
11722166_at	-4.48946	11.0732	-15.1576	0.000521231	0.132667	RGS5	regulator of G-protein signaling 5
11720748_a_at	-2.12663	9.20279	-15.1495	0.000522082	0.132667	LTBP4	latent transforming growth factor beta binding protein 4
11749172_x_at	-3.20584	8.88275	-15.0327	0.000534615	0.132667	NEXN	nexilin (F actin binding protein)
11759287_at	-2.14272	9.19633	-15.0168	0.000536354	0.132667	DNAJB4	DnaJ (Hsp40) homolog, subfamily B, member 4
11727292_a_at	2.11801	8.68241	15.0012	0.000538065	0.132667	C1orf162	chromosome 1 open reading frame 162
11758746_a_at	-2.7236	9.43135	-14.9558	0.000543081	0.132667	MGP	matrix Gla protein
11753338_x_at	-4.15737	11.025	-14.9451	0.000544278	0.132667	FHL1	four and a half LIM domains 1
11718604_a_at	-2.09675	9.22242	-14.9111	0.000548095	0.132667	C7orf41	chromosome 7 open reading frame 41
11725346_x_at	2.16167	11.7402	14.8918	0.000550272	0.132667	GPX1	glutathione peroxidase 1
11746591_a_at	-2.12812	8.75493	-14.8847	0.000551077	0.132667	CDH13	cadherin 13, H-cadherin (heart)
11718903_a_at	-2.19787	9.5883	-14.8604	0.000553842	0.132667	FILIP1L	filamin A interacting protein 1-like
11757532_s_at	2.31797	7.99663	14.8416	0.000555997	0.132667	RBM47	RNA binding motif protein 47
11756914_a_at	-2.12406	8.15101	-14.8409	0.000556076	0.132667	NTRK2	neurotrophic tyrosine kinase, receptor, type 2
11725175_x_at	2.2034	8.63886	14.8309	0.000557224	0.132667	ADAP2	ArfGAP with dual PH domains 2
11717979_at	-2.91005	9.30783	-14.8188	0.000558619	0.132667	C7	complement component 7
11755066_x_at	-2.20033	8.80715	-14.797	0.00056115	0.132667	MFGE8	milk fat globule-EGF factor 8 protein
11727698_a_at	2.54123	8.56452	14.7953	0.000561341	0.132667	VMO1	vitelline membrane outer layer 1 homolog (chicken)
11757702_s_at	2.07459	7.63321	14.7769	0.000563484	0.132667	DSC2	desmocollin 2
11751158_x_at	-2.07378	8.28467	-14.7727	0.000563975	0.132667	SMTN	smoothelin
11715837_a_at	2.13109	11.2364	14.7589	0.000565592	0.132667	HEXB	hexosaminidase B (beta polypeptide)
11750130_a_at	-2.09984	8.24886	-14.7491	0.000566754	0.132667	MRVI1	murine retrovirus integration site 1 homolog
11758039_s_at	2.16233	7.68919	14.7325	0.000568708	0.132667	SDS	serine dehydratase
11720231_s_at	-2.19282	9.83509	-14.7307	0.000568916	0.132667	TES	testis derived transcript (3 LIM domains)
11755109_a_at	-3.1284	9.70912	-14.6983	0.000572775	0.132667	CYFIP2	cytoplasmic FMR1 interacting protein 2
11718972_at	3.83574	8.43234	14.6593	0.000577458	0.132667	LPL	lipoprotein lipase
11756712_a_at	2.18634	8.64784	14.6567	0.000577769	0.132667	ACP2	acid phosphatase 2, lysosomal
11718602_a_at	-2.35809	8.95705	-14.6178	0.000582488	0.132667	C7orf41	chromosome 7 open reading frame 41
11725174_a_at	2.0618	8.40803	14.5899	0.000585907	0.132667	ADAP2	ArfGAP with dual PH domains 2
11744066_a_at	-2.23941	9.05217	-14.5834	0.000586712	0.132667	PRDM6	PR domain containing 6
11759826_x_at	2.91039	8.85119	14.5825	0.000586823	0.132667	GPNMB	glycoprotein (transmembrane) nmb
11719862_a_at	2.77627	9.26031	14.4605	0.000602111	0.132667	TREM1	triggering receptor expressed on myeloid cells 1
11733832_a_at	-2.16353	7.97989	-14.4544	0.00060289	0.132667	MAP2	microtubule-associated protein 2
11759791_at	-2.04757	8.48806	-14.4459	0.000603981	0.132667	FILIP1	filamin A interacting protein 1
11754888_a_at	-2.27947	9.33767	-14.396	0.000610421	0.132667	ADSSL1	adenylosuccinate synthase like 1
11719921_s_at	2.86202	9.71176	14.3837	0.000612019	0.132667	GM2A	GM2 ganglioside activator
11758259_s_at	2.22771	8.14166	14.3591	0.00061523	0.132667	SLCO2B1	solute carrier organic anion transporter family, member 2B1
11752562_x_at	-2.47219	8.50576	-14.3502	0.000616395	0.132667	CDH13	cadherin 13, H-cadherin (heart)
11744276_a_at	3.91197	9.94068	14.3488	0.00061658	0.132667	CAPG	capping protein (actin filament), gelsolin-like
11717045_a_at	2.34064	8.16141	14.3453	0.000617044	0.132667	C2	complement component 2
11734214_a_at	-2.58949	8.19033	-14.3008	0.000622941	0.132667	MPP7	membrane protein, palmitoylated 7 (MAGUK p55 subfamily member 7)
11715496_a_at	3.0661	11.1973	14.2917	0.000624163	0.132667	CTSK	cathepsin K
11757438_x_at	-2.29628	12.2651	-14.0995	0.000650577	0.132667	DSTN	destrin (actin depolymerizing factor)
11723194_x_at	2.08513	11.984	14.0761	0.000653891	0.132667	HLA-DRB1 /// HLA-DRB3 /// HLA-DRB4 /// HLA-DRB5 /// LOC100507709 /// LOC100507714 /// LOC101060779	major histocompatibility complex, class II, DR beta 1 /// major histocompatibility complex, class II, DR beta 3 /// major histocompatibility complex, class II, DR beta 4 /// major histocompatibility complex, class II, DR beta 5 /// HLA class II histocompatibility antigen, DRB1-7 beta chain-like /// HLA class II histocompatibility antigen, DRB1-7 beta chain-like /// HLA class II histocompatibility…
11716666_a_at	-2.15996	9.69398	-14.062	0.000655902	0.132667	ID3	inhibitor of DNA binding 3, dominant negative helix-loop-helix protein
11745839_a_at	-2.10071	8.61242	-14.0583	0.000656425	0.132667	C9orf3 /// LOC100507319	chromosome 9 open reading frame 3 /// uncharacterized LOC100507319
11723784_a_at	-1.99046	8.60895	-14.0533	0.000657136	0.132667	LIMCH1	LIM and calponin homology domains 1
11754887_a_at	-2.01815	9.47048	-14.0067	0.000663845	0.132667	MSRB3	methionine sulfoxide reductase B3
11752610_a_at	2.01771	7.94942	14.002	0.000664536	0.132667	THEMIS2	thymocyte selection associated family member 2
11743265_a_at	-1.97061	8.66931	-13.975	0.00066847	0.132667	ENSA	endosulfine alpha
11747559_a_at	-2.15761	7.95469	-13.9663	0.000669747	0.132667	PDZRN3	PDZ domain containing ring finger 3
11733083_s_at	-2.40188	11.5447	-13.9451	0.000672868	0.132667	PALLD	palladin, cytoskeletal associated protein
11724805_a_at	2.2222	8.38618	13.925	0.00067584	0.132667	LAIR1	leukocyte-associated immunoglobulin-like receptor 1
11755522_a_at	2.37382	9.03943	13.9199	0.0006766	0.132667	LPXN	leupaxin
11734162_a_at	2.23814	7.36659	13.9193	0.000676688	0.132667	TFEC	transcription factor EC
11746639_a_at	1.98239	9.17468	13.8585	0.000685816	0.132667	RASSF2	Ras association (RalGDS/AF-6) domain family member 2
11742794_s_at	-2.08245	10.5307	-13.8563	0.000686147	0.132667	SBDS /// SBDSP1	Shwachman-Bodian-Diamond syndrome /// Shwachman-Bodian-Diamond syndrome pseudogene 1
11747737_x_at	-3.95158	10.7874	-13.841	0.000688465	0.132667	CNN1	calponin 1, basic, smooth muscle
11741168_a_at	-2.46671	9.46265	-13.8305	0.000690065	0.132667	MSRB3	methionine sulfoxide reductase B3
11717050_x_at	-2.50021	10.2754	-13.8248	0.000690941	0.132667	DES	desmin
11715562_x_at	2.10438	7.62387	13.8238	0.000691089	0.132667	SCD	stearoyl-CoA desaturase (delta-9-desaturase)
11719871_a_at	1.9376	8.4954	13.7733	0.00069888	0.132667	TMEM176B	transmembrane protein 176B
11749905_a_at	-4.19416	11.1312	-13.7663	0.00069996	0.132667	CYR61	cysteine-rich, angiogenic inducer, 61
11724954_s_at	1.94223	8.36385	13.7418	0.000703792	0.132667	MRC1	mannose receptor, C type 1
11722843_a_at	-2.09293	8.52402	-13.7337	0.00070505	0.132667	ENAH	enabled homolog (Drosophila)
11740871_a_at	2.21269	9.02097	13.7326	0.000705227	0.132667	MS4A7	membrane-spanning 4-domains, subfamily A, member 7
11743724_a_at	2.17619	10.0001	13.7275	0.000706036	0.132667	MFSD1	major facilitator superfamily domain containing 1
11747047_a_at	-2.39673	9.68152	-13.7027	0.000709943	0.132667	MAP3K7CL	MAP3K7 C-terminal like
11745989_a_at	2.08885	9.40952	13.6885	0.000712199	0.132667	HLA-DMA	major histocompatibility complex, class II, DM alpha
11729721_s_at	2.05175	8.73692	13.6875	0.000712356	0.132667	LILRA6 /// LILRB3	leukocyte immunoglobulin-like receptor, subfamily A (with TM domain), member 6 /// leukocyte immunoglobulin-like receptor, subfamily B (with TM and ITIM domains), member 3
11739054_a_at	2.27116	8.30458	13.6843	0.000712874	0.132667	PTPN6	protein tyrosine phosphatase, non-receptor type 6
11723205_a_at	2.21976	8.47104	13.6698	0.000715184	0.132667	PGD	phosphogluconate dehydrogenase
11728307_x_at	-2.43539	8.49761	-13.6261	0.000722216	0.132667	GULP1	GULP, engulfment adaptor PTB domain containing 1
11752095_a_at	2.00758	8.14291	13.6161	0.00072384	0.132667	PTPRC	protein tyrosine phosphatase, receptor type, C
11759373_a_at	-3.16671	11.3579	-13.6118	0.000724538	0.132667	CSRP1	cysteine and glycine-rich protein 1
11716559_x_at	-2.34167	9.73231	-13.6098	0.000724874	0.132667	TNS1	tensin 1
11727843_a_at	2.10302	8.41099	13.5971	0.000726935	0.132667	SLC11A1	solute carrier family 11 (proton-coupled divalent metal ion transporters), member 1
11718490_s_at	3.80971	10.1234	13.5927	0.000727662	0.132667	FABP5 /// FABP5P3 /// LOC101060453	fatty acid binding protein 5 (psoriasis-associated) /// fatty acid binding protein 5 pseudogene 3 /// fatty acid-binding protein, epidermal-like
11739232_x_at	1.92679	9.08109	13.5791	0.000729891	0.132667	RASSF2	Ras association (RalGDS/AF-6) domain family member 2
11735273_at	-1.96231	8.24947	-13.5769	0.000730258	0.132667	TBX18	T-box 18
11756980_s_at	1.90532	7.33989	13.5729	0.000730921	0.132667	HS3ST2	heparan sulfate (glucosamine) 3-O-sulfotransferase 2
11726532_a_at	1.94464	8.20975	13.5726	0.000730969	0.132667	CYTH4	cytohesin 4
11725444_at	2.18947	7.73182	13.5452	0.00073549	0.132667	CCR1	chemokine (C-C motif) receptor 1
11726421_a_at	1.97832	8.87551	13.5225	0.000739276	0.132667	APBB1IP	amyloid beta (A4) precursor protein-binding, family B, member 1 interacting protein
11733691_a_at	1.89993	7.21785	13.5135	0.000740782	0.132667	SIGLEC7	sialic acid binding Ig-like lectin 7
11758318_s_at	3.20223	12.2511	13.4945	0.000743973	0.132667	CSTB	cystatin B (stefin B)
11720339_at	-2.09641	8.18266	-13.486	0.000745401	0.132667	FIBIN	fin bud initiation factor homolog (zebrafish)
11736342_at	-2.41146	8.41657	-13.4764	0.000747031	0.132667	EGR3	early growth response 3
11749587_x_at	1.9108	9.12312	13.4703	0.000748074	0.132667	FCGR2A	Fc fragment of IgG, low affinity IIa, receptor (CD32)
11746023_a_at	2.20584	8.49003	13.4631	0.000749291	0.132667	PGD	phosphogluconate dehydrogenase
11759088_at	2.42294	8.79702	13.4593	0.000749942	0.132667	MARCH1	membrane-associated ring finger (C3HC4) 1, E3 ubiquitin protein ligase
11717048_a_at	-3.67176	9.61512	-13.4046	0.00075934	0.132667	DES	desmin
11725749_a_at	2.14468	7.12834	13.3813	0.000763379	0.132667	GAL	galanin/GMAP prepropeptide
11728320_a_at	3.39205	12.1019	13.3724	0.000764932	0.132667	CSTB	cystatin B (stefin B)
11718121_x_at	1.88868	8.99241	13.3682	0.000765666	0.132667	ATP6V1A	ATPase, H+ transporting, lysosomal 70kDa, V1 subunit A
11724836_at	2.51871	8.22345	13.3623	0.000766704	0.132667	NCEH1	neutral cholesterol ester hydrolase 1
11740782_a_at	1.88001	6.88316	13.3612	0.000766894	0.132667	RNF128	ring finger protein 128, E3 ubiquitin protein ligase
11719234_at	-3.20868	9.39854	-13.3582	0.000767419	0.132667	RASL12	RAS-like, family 12
11718620_a_at	-1.94964	8.73572	-13.3322	0.000772003	0.132667	CHRDL1	chordin-like 1
11719132_s_at	1.88927	8.80886	13.3138	0.00077528	0.132667	FAM49B	family with sequence similarity 49, member B
11750527_s_at	2.12309	10.1457	13.2812	0.000781108	0.132667	HLA-DQA1 /// HLA-DRA	major histocompatibility complex, class II, DQ alpha 1 /// major histocompatibility complex, class II, DR alpha
11741555_s_at	3.37074	11.3727	13.2764	0.000781966	0.132667	LIPA	lipase A, lysosomal acid, cholesterol esterase
11724771_x_at	1.86414	9.51208	13.2539	0.000786024	0.132667	FCGR2A	Fc fragment of IgG, low affinity IIa, receptor (CD32)
11717516_s_at	-3.97378	9.6144	-13.2173	0.000792706	0.132667	EFHD1	EF-hand domain family, member D1
11756401_x_at	1.88836	9.73612	13.209	0.000794217	0.132667	FAM49B	family with sequence similarity 49, member B
11727092_x_at	1.86399	6.85365	13.1939	0.000797005	0.132667	IL18	interleukin 18 (interferon-gamma-inducing factor)
11718120_at	1.89269	8.60089	13.1548	0.000804257	0.132667	ATP6V1A	ATPase, H+ transporting, lysosomal 70kDa, V1 subunit A
11733612_s_at	1.98381	8.41688	13.1497	0.000805222	0.132667	DOCK8	dedicator of cytokinesis 8
11733728_a_at	2.36876	10.9234	13.1436	0.000806353	0.132667	LGMN	legumain
11747328_a_at	-3.94377	10.8471	-13.1089	0.000812888	0.132667	FHL1	four and a half LIM domains 1
11757287_x_at	3.30491	12.1294	13.0944	0.000815639	0.132667	CSTB	cystatin B (stefin B)
11721454_a_at	1.84039	7.74249	13.0823	0.00081796	0.132667	SERPINA1	serpin peptidase inhibitor, clade A (alpha-1 antiproteinase, antitrypsin), member 1
11757013_x_at	-1.98113	10.2726	-13.0578	0.000822644	0.132667	CAV1	caveolin 1, caveolae protein, 22kDa
11754381_a_at	-2.45589	8.59104	-13.0543	0.000823325	0.132667	TMOD1	tropomodulin 1
11725685_a_at	1.83751	7.64755	13.0433	0.000825457	0.132667	PTPRO	protein tyrosine phosphatase, receptor type, O
11720852_s_at	-1.98435	8.52661	-13.025	0.000828992	0.132667	NFIA	nuclear factor I/A
11737147_a_at	1.92541	7.34247	12.99	0.000835836	0.132667	CLEC7A	C-type lectin domain family 7, member A
11721629_a_at	2.42045	9.20525	12.9893	0.000835976	0.132667	MAFB	v-maf musculoaponeurotic fibrosarcoma oncogene homolog B (avian)
11758194_s_at	2.70101	7.52656	12.9558	0.000842594	0.132667	DPP4	dipeptidyl-peptidase 4
11732021_x_at	-1.86365	8.69423	-12.9339	0.000846958	0.132667	SMTN	smoothelin
11717447_s_at	-2.24558	12.9011	-12.9063	0.000852489	0.132667	DSTN	destrin (actin depolymerizing factor)
11742819_at	2.02289	8.53232	12.9058	0.0008526	0.132667	PLAUR	plasminogen activator, urokinase receptor
11753671_x_at	-2.24497	12.3588	-12.856	0.000862728	0.132667	DSTN	destrin (actin depolymerizing factor)
11757469_s_at	1.80894	10.7785	12.8364	0.000866742	0.132667	TPP1	tripeptidyl peptidase I
11720717_a_at	-2.70833	8.93328	-12.8132	0.000871561	0.132667	FGF13	fibroblast growth factor 13
11731638_a_at	-1.8138	8.17056	-12.8044	0.000873381	0.132667	GAB1	GRB2-associated binding protein 1
11722915_at	-1.80557	7.75684	-12.7922	0.000875921	0.132667	BMPR1A	bone morphogenetic protein receptor, type IA
11731537_at	-4.74254	9.72121	-12.7843	0.000877571	0.132667	FHL5	four and a half LIM domains 5
11741567_x_at	2.39307	9.71274	12.7731	0.000879924	0.132667	SLCO2B1	solute carrier organic anion transporter family, member 2B1
11749782_x_at	2.29431	7.66216	12.7675	0.000881105	0.132667	BCAT1	branched chain amino-acid transaminase 1, cytosolic
11725641_at	1.84723	8.54056	12.7611	0.000882458	0.132667	EFHD2	EF-hand domain family, member D2
11753898_x_at	1.88761	10.3416	12.7545	0.000883861	0.132667	HLA-DQA1 /// LOC100509457	major histocompatibility complex, class II, DQ alpha 1 /// HLA class II histocompatibility antigen, DQ alpha 1 chain-like
11716161_s_at	-1.85645	8.91642	-12.7413	0.000886652	0.132667	LBH	limb bud and heart development
11715561_s_at	1.84867	7.74793	12.733	0.000888411	0.132667	SCD	stearoyl-CoA desaturase (delta-9-desaturase)
11717215_a_at	-1.85135	7.85532	-12.725	0.000890123	0.132667	ATP9A	ATPase, class II, type 9A
11723882_x_at	2.40171	8.81294	12.7181	0.000891604	0.132667	CECR1	cat eye syndrome chromosome region, candidate 1
11757455_x_at	2.05265	12.2507	12.7162	0.000892003	0.132667	GPX1	glutathione peroxidase 1
11721455_s_at	1.82288	8.41614	12.7115	0.000893004	0.132667	SERPINA1	serpin peptidase inhibitor, clade A (alpha-1 antiproteinase, antitrypsin), member 1
11754056_x_at	3.30995	12.1856	12.678	0.000900238	0.132667	CSTB	cystatin B (stefin B)
11722449_x_at	2.1702	9.25896	12.671	0.000901755	0.132667	TYMP	thymidine phosphorylase
11715846_at	-2.799	10.7058	-12.6422	0.000908027	0.132667	EFEMP1	EGF containing fibulin-like extracellular matrix protein 1
11719804_a_at	-1.79602	8.9424	-12.6343	0.000909769	0.132667	ASPN	asporin
11760878_x_at	1.96206	10.1428	12.627	0.000911366	0.132667	HLA-DPB1	major histocompatibility complex, class II, DP beta 1
11722531_a_at	-3.10565	9.46215	-12.6252	0.00091178	0.132667	CALD1	caldesmon 1
11757369_s_at	1.90358	9.06112	12.6164	0.000913704	0.132667	MAN2B1	mannosidase, alpha, class 2B, member 1
11753902_a_at	-1.94397	11.4476	-12.6126	0.000914557	0.132667	ACTN4	actinin, alpha 4
11750805_x_at	-1.77897	7.84389	-12.6041	0.000916439	0.132667	LIMCH1	LIM and calponin homology domains 1
11744374_x_at	2.05934	11.0604	12.6024	0.000916805	0.132667	HLA-DRB1 /// HLA-DRB3 /// HLA-DRB5 /// LOC100507709 /// LOC100507714	major histocompatibility complex, class II, DR beta 1 /// major histocompatibility complex, class II, DR beta 3 /// major histocompatibility complex, class II, DR beta 5 /// HLA class II histocompatibility antigen, DRB1-7 beta chain-like /// HLA class II histocompatibility antigen, DRB1-7 beta chain-like
11739564_s_at	-1.82893	10.4173	-12.5795	0.000921924	0.132667	ITPR1	inositol 1,4,5-trisphosphate receptor, type 1
11741153_a_at	2.4357	8.17223	12.568	0.000924489	0.132667	NCF2	neutrophil cytosolic factor 2
11718337_a_at	-3.89769	10.5917	-12.5599	0.000926317	0.132667	LMOD1	leiomodin 1 (smooth muscle)
11747671_x_at	-2.2097	9.94183	-12.5481	0.000928971	0.132667	CRIP2	cysteine-rich protein 2
11722583_a_at	-2.40784	10.1311	-12.5402	0.000930756	0.132667	IGFBP2	insulin-like growth factor binding protein 2, 36kDa
11718781_s_at	-1.79485	8.56543	-12.5382	0.000931203	0.132667	SSBP2	single-stranded DNA binding protein 2
11757972_s_at	-1.81799	9.77804	-12.5358	0.000931748	0.132667	MYLIP	myosin regulatory light chain interacting protein
11742971_s_at	1.77685	9.79907	12.5343	0.000932085	0.132667	COLEC12	collectin sub-family member 12
11739846_a_at	3.42489	8.61171	12.5208	0.000935157	0.132667	MSR1	macrophage scavenger receptor 1
11721347_a_at	2.07555	8.67021	12.5178	0.000935847	0.132667	MPEG1	macrophage expressed 1
11716160_at	-2.00145	8.72661	-12.5178	0.000935855	0.132667	LBH	limb bud and heart development
11739149_a_at	1.78004	8.35627	12.515	0.000936486	0.132667	SAMHD1	SAM domain and HD domain 1
11739401_a_at	1.84652	8.82056	12.5087	0.00093792	0.132667	CD74	CD74 molecule, major histocompatibility complex, class II invariant chain
11742821_s_at	-3.11538	9.69422	-12.5042	0.000938959	0.132667	OGN	osteoglycin
11734982_a_at	-1.76023	7.70487	-12.5007	0.000939767	0.132667	GPRASP1	G protein-coupled receptor associated sorting protein 1
11720541_at	-1.80848	8.55781	-12.4811	0.000944274	0.132667	LGALSL	lectin, galactoside-binding-like
11721456_x_at	1.77524	8.31889	12.4765	0.000945326	0.132667	SERPINA1	serpin peptidase inhibitor, clade A (alpha-1 antiproteinase, antitrypsin), member 1
11729664_s_at	-1.84514	8.89594	-12.4724	0.000946287	0.132667	STK38L	serine/threonine kinase 38 like
11726338_a_at	1.75595	7.97363	12.4701	0.0009468	0.132667	ALOX5	arachidonate 5-lipoxygenase
11720558_a_at	-2.63653	9.40744	-12.4615	0.000948797	0.132667	GEM	GTP binding protein overexpressed in skeletal muscle
11739053_a_at	1.80153	8.45365	12.4558	0.00095013	0.132667	SLCO2B1	solute carrier organic anion transporter family, member 2B1
11756970_a_at	4.1862	8.49668	12.4388	0.000954104	0.132667	CHIT1	chitinase 1 (chitotriosidase)
11718571_at	-1.76608	8.71002	-12.4181	0.000958947	0.132667	NT5DC3	5'-nucleotidase domain containing 3
11716554_a_at	2.26157	9.57131	12.4091	0.00096108	0.132667	HLA-DMA	major histocompatibility complex, class II, DM alpha
11716359_a_at	1.74212	8.61789	12.409	0.000961093	0.132667	FAM96A	family with sequence similarity 96, member A
11721557_a_at	-1.88454	8.33151	-12.3965	0.000964055	0.132667	ABCA8	ATP-binding cassette, sub-family A (ABC1), member 8
11715413_s_at	-1.75273	11.4624	-12.3863	0.000966483	0.132667	TSC22D1	TSC22 domain family, member 1
11729736_a_at	1.75152	6.49195	12.3491	0.000975399	0.132667	JAKMIP2	janus kinase and microtubule interacting protein 2
11727283_at	-2.15785	9.06279	-12.347	0.000975885	0.132667	ECM2	extracellular matrix protein 2, female organ and adipocyte specific
11759642_x_at	2.10183	11.8224	12.3339	0.000979053	0.132667	HLA-DRB1	major histocompatibility complex, class II, DR beta 1
11747736_s_at	-4.34772	10.1631	-12.3235	0.000981585	0.132667	CNN1	calponin 1, basic, smooth muscle
11719047_s_at	-1.74147	8.47841	-12.3077	0.000985429	0.132667	WEE1	WEE1 homolog (S. pombe)
11748016_a_at	-5.57945	10.6447	-12.3071	0.000985575	0.132667	ACTG2	actin, gamma 2, smooth muscle, enteric
11717067_a_at	1.83166	7.8327	12.2979	0.000987811	0.132667	GREM1	gremlin 1, DAN family BMP antagonist
11720855_a_at	-1.85578	8.72662	-12.2685	0.000995046	0.132667	NFIA	nuclear factor I/A
11734215_x_at	-2.63689	8.00748	-12.2637	0.000996244	0.132667	MPP7	membrane protein, palmitoylated 7 (MAGUK p55 subfamily member 7)
11723871_a_at	2.20494	8.24843	12.2597	0.00099724	0.132667	DOCK2	dedicator of cytokinesis 2
11743560_a_at	2.04271	7.94324	12.2587	0.000997481	0.132667	PTPRC	protein tyrosine phosphatase, receptor type, C
11715493_a_at	-4.34247	11.2136	-12.2509	0.000999428	0.132667	CYR61	cysteine-rich, angiogenic inducer, 61
11740133_a_at	-3.16076	9.56792	-12.2448	0.00100094	0.132667	CALD1	caldesmon 1
11716825_a_at	-1.92225	9.28233	-12.2344	0.00100353	0.132667	FMOD	fibromodulin
11720611_a_at	-1.73277	7.79183	-12.2336	0.00100372	0.132667	NAP1L5	nucleosome assembly protein 1-like 5
11753179_s_at	1.89642	8.13164	12.2316	0.00100422	0.132667	FAM134B	family with sequence similarity 134, member B
11756645_x_at	2.49019	9.7184	12.2206	0.00100701	0.132667	CXCL16	chemokine (C-X-C motif) ligand 16
11743011_a_at	2.13369	8.74707	12.2202	0.00100708	0.132667	GPR137B	G protein-coupled receptor 137B
11721099_at	2.837	9.37714	12.1928	0.00101401	0.132667	C3AR1	complement component 3a receptor 1
11728679_a_at	3.78305	9.70116	12.1895	0.00101486	0.132667	CD163	CD163 molecule
11742793_at	-1.7102	11.2392	-12.1733	0.00101896	0.132667	SBDS	Shwachman-Bodian-Diamond syndrome
11748659_a_at	-3.0669	11.8429	-12.159	0.00102263	0.132667	EFEMP1	EGF containing fibulin-like extracellular matrix protein 1
11764124_s_at	-4.70259	10.0066	-12.1589	0.00102264	0.132667	---	---
11724848_a_at	-1.84267	9.41985	-12.1509	0.00102471	0.132667	DIXDC1	DIX domain containing 1
11736073_a_at	-2.39213	8.9587	-12.1441	0.00102645	0.132667	ALDH1B1	aldehyde dehydrogenase 1 family, member B1
11755291_a_at	1.79401	7.33768	12.1368	0.00102832	0.132667	DENND2D	DENN/MADD domain containing 2D
11764110_s_at	-3.41225	9.06929	-12.1134	0.00103441	0.132667	ID4	inhibitor of DNA binding 4, dominant negative helix-loop-helix protein
11753220_a_at	-2.93507	9.94003	-12.0951	0.00103917	0.132667	KCNMB1	potassium large conductance calcium-activated channel, subfamily M, beta member 1
11739754_at	1.7857	8.21032	12.0874	0.00104119	0.132667	SLAMF8	SLAM family member 8
11720543_at	-1.69435	8.51999	-12.0638	0.00104741	0.132667	B3GALNT2	beta-1,3-N-acetylgalactosaminyltransferase 2
11756881_a_at	-2.41616	7.08102	-12.0515	0.00105068	0.132667	PCDH20	protocadherin 20
11733077_a_at	-1.69207	9.71577	-12.0501	0.00105104	0.132667	PPP1R12A	protein phosphatase 1, regulatory subunit 12A
11715551_s_at	-1.82337	9.79349	-12.0432	0.00105288	0.132667	GAS6	growth arrest-specific 6
11728764_a_at	1.73347	6.88313	12.0388	0.00105407	0.132667	PVRL4	poliovirus receptor-related 4
11724442_a_at	-1.86878	8.00655	-12.0271	0.00105718	0.132667	PTGIS	prostaglandin I2 (prostacyclin) synthase
11719923_at	2.01351	7.85687	11.9943	0.00106603	0.132667	GM2A	GM2 ganglioside activator
11757186_a_at	2.40224	8.93712	11.9879	0.00106775	0.132667	HK3	hexokinase 3 (white cell)
11740873_x_at	1.90673	8.19105	11.9757	0.00107106	0.132667	MS4A7	membrane-spanning 4-domains, subfamily A, member 7
11725521_x_at	1.68394	12.6117	11.9516	0.00107765	0.132667	GLUL	glutamate-ammonia ligase
11757327_x_at	1.86939	14.3957	11.9505	0.00107796	0.132667	FTL	ferritin, light polypeptide
11751117_x_at	-1.68027	10.3504	-11.9468	0.00107897	0.132667	ACTN1	actinin, alpha 1
11729580_s_at	-2.44278	9.34015	-11.9378	0.00108145	0.132667	CDH13	cadherin 13, H-cadherin (heart)
11733078_a_at	-1.69006	8.63363	-11.9359	0.00108198	0.132667	PPP1R12A	protein phosphatase 1, regulatory subunit 12A
11729349_at	2.184	6.88383	11.9316	0.00108318	0.132667	MMP8	matrix metallopeptidase 8 (neutrophil collagenase)
11760799_x_at	1.79474	9.39804	11.9283	0.00108408	0.132667	HLA-DPB1	major histocompatibility complex, class II, DP beta 1
11728388_at	-1.99179	8.55876	-11.9239	0.00108529	0.132667	TSPAN2	tetraspanin 2
11742751_a_at	-3.24285	9.22713	-11.9074	0.00108989	0.132667	ITIH3	inter-alpha-trypsin inhibitor heavy chain 3
11720989_a_at	1.92511	8.55092	11.8987	0.00109231	0.132667	SLC7A7	solute carrier family 7 (amino acid transporter light chain, y+L system), member 7
11719718_a_at	1.86563	8.01256	11.8833	0.00109664	0.132667	SYK	spleen tyrosine kinase
11727867_a_at	-1.88831	9.62701	-11.8809	0.0010973	0.132667	CLEC3B /// EXOSC7	C-type lectin domain family 3, member B /// exosome component 7
11721318_at	-3.22263	9.46379	-11.8607	0.00110301	0.132667	PARM1	prostate androgen-regulated mucin-like protein 1
11725413_x_at	1.69238	7.61569	11.8561	0.00110432	0.132667	TRIM14	tripartite motif containing 14
11732177_s_at	-4.17769	9.63654	-11.8185	0.00111504	0.132667	MYH11	myosin, heavy chain 11, smooth muscle
11746995_a_at	3.60147	8.11969	11.8057	0.00111873	0.132667	NPL	N-acetylneuraminate pyruvate lyase (dihydrodipicolinate synthase)
11725631_a_at	-1.99752	8.48664	-11.7834	0.0011252	0.132667	NR4A2	nuclear receptor subfamily 4, group A, member 2
11725531_a_at	1.7241	7.11172	11.7765	0.00112721	0.132667	DSC2	desmocollin 2
11744017_at	2.2768	8.81917	11.7714	0.00112869	0.132667	FERMT3	fermitin family member 3
11740872_a_at	1.76977	7.93099	11.7708	0.00112886	0.132667	MS4A7	membrane-spanning 4-domains, subfamily A, member 7
11754977_x_at	4.07206	11.9567	11.7325	0.00114011	0.132667	CTSB	cathepsin B
11758999_s_at	-1.64701	9.57557	-11.7316	0.00114037	0.132667	UBE2H	ubiquitin-conjugating enzyme E2H
11746492_s_at	-1.6826	9.05411	-11.7269	0.00114177	0.132667	SGCE	sarcoglycan, epsilon
11728305_s_at	-2.10326	7.35397	-11.6888	0.00115314	0.132667	GULP1	GULP, engulfment adaptor PTB domain containing 1
11734225_x_at	-1.8644	8.67492	-11.6823	0.00115508	0.132667	LIMCH1	LIM and calponin homology domains 1
11747329_x_at	-3.95666	10.9087	-11.6791	0.00115607	0.132667	FHL1	four and a half LIM domains 1
11757307_s_at	2.99904	10.8771	11.6709	0.00115853	0.132667	CTSD	cathepsin D
11755952_x_at	1.69468	8.8265	11.6568	0.0011628	0.132667	ARRB2	arrestin, beta 2
11753661_a_at	-1.63957	9.64586	-11.6502	0.00116479	0.132667	ID1	inhibitor of DNA binding 1, dominant negative helix-loop-helix protein
11723849_a_at	1.7998	8.1419	11.6452	0.00116633	0.132667	MS4A6A	membrane-spanning 4-domains, subfamily A, member 6A
11721762_a_at	1.70871	8.06119	11.6379	0.00116856	0.132667	PIK3R5	phosphoinositide-3-kinase, regulatory subunit 5
11717012_s_at	3.75387	9.76784	11.6346	0.00116957	0.132667	VAMP8	vesicle-associated membrane protein 8
11743559_a_at	2.36097	8.84234	11.6278	0.00117165	0.132667	PTPRC	protein tyrosine phosphatase, receptor type, C
11717066_at	1.91133	7.82635	11.6265	0.00117204	0.132667	GREM1	gremlin 1, DAN family BMP antagonist
11732675_at	-1.65508	7.90749	-11.6261	0.00117218	0.132667	RNF180	ring finger protein 180
11715919_a_at	1.6566	10.7188	11.6076	0.00117786	0.132667	SH3BGRL3	SH3 domain binding glutamic acid-rich protein like 3
11737096_a_at	1.67279	7.17971	11.6056	0.00117848	0.132667	DSC2	desmocollin 2
11742896_s_at	1.65641	10.1041	11.6055	0.00117851	0.132667	H2AFY	H2A histone family, member Y
11751097_x_at	2.12877	7.11922	11.5975	0.00118099	0.132667	SNX10	sorting nexin 10
11759666_x_at	1.68427	10.625	11.5843	0.0011851	0.132667	HLA-DPB1	major histocompatibility complex, class II, DP beta 1
11719394_a_at	-2.01457	8.68657	-11.5664	0.00119069	0.132667	FBXO32	F-box protein 32
11724460_a_at	-2.65983	10.2166	-11.5604	0.00119255	0.132667	MCAM	melanoma cell adhesion molecule
11721110_s_at	-1.82251	7.77456	-11.5467	0.00119687	0.132667	NAP1L3	nucleosome assembly protein 1-like 3
11726252_a_at	1.8528	7.34722	11.538	0.00119962	0.132667	SLC1A3	solute carrier family 1 (glial high affinity glutamate transporter), member 3
11755925_s_at	2.98796	10.9209	11.5193	0.00120555	0.132667	CTSD	cathepsin D
11717760_a_at	1.62277	8.99818	11.5162	0.00120653	0.132667	GMFG	glia maturation factor, gamma
11755279_x_at	1.67756	11.0344	11.5082	0.0012091	0.132667	HLA-DPB1	major histocompatibility complex, class II, DP beta 1
11718335_a_at	-3.17675	9.11179	-11.506	0.00120978	0.132667	LMOD1	leiomodin 1 (smooth muscle)
11751426_a_at	-1.85005	7.88828	-11.4971	0.00121266	0.132667	IL33	interleukin 33
11721758_at	-4.65681	10.7182	-11.497	0.00121267	0.132667	TMEM47	transmembrane protein 47
11737221_a_at	-1.92003	8.94693	-11.495	0.00121331	0.132667	FERMT2	fermitin family member 2
11729058_s_at	-2.33823	8.65285	-11.4937	0.00121374	0.132667	NR4A3	nuclear receptor subfamily 4, group A, member 3
11744484_s_at	1.61394	13.2022	11.4929	0.00121398	0.132667	HLA-DRA	major histocompatibility complex, class II, DR alpha
11721661_a_at	2.31326	8.34641	11.4849	0.00121658	0.132667	TBXAS1	thromboxane A synthase 1 (platelet)
11718787_at	-1.73853	8.21344	-11.484	0.00121685	0.132667	NRGN	neurogranin (protein kinase C substrate, RC3)
11748120_a_at	1.64902	8.17643	11.4813	0.00121774	0.132667	LCP2	lymphocyte cytosolic protein 2 (SH2 domain containing leukocyte protein of 76kDa)
11740213_a_at	-1.67518	9.43478	-11.4777	0.00121889	0.132667	TBL1X	transducin (beta)-like 1X-linked
11731620_a_at	1.7068	7.69917	11.477	0.00121913	0.132667	ARRB2	arrestin, beta 2
11742850_x_at	1.62023	12.5379	11.471	0.00122104	0.132667	HLA-DRA	major histocompatibility complex, class II, DR alpha
11724768_s_at	1.74351	7.95399	11.4637	0.00122343	0.132667	FCGR2A /// FCGR2C	Fc fragment of IgG, low affinity IIa, receptor (CD32) /// Fc fragment of IgG, low affinity IIc, receptor for (CD32) (gene/pseudogene)
11728055_at	-1.71337	7.79568	-11.459	0.00122495	0.132667	GHR	growth hormone receptor
11724178_a_at	-2.00162	8.59154	-11.4505	0.00122771	0.132667	DAAM2	dishevelled associated activator of morphogenesis 2
11754334_s_at	-3.29305	11.1679	-11.4474	0.00122874	0.132667	EGR1	early growth response 1
11723616_a_at	2.75565	10.1279	11.4426	0.00123031	0.132667	PLTP	phospholipid transfer protein
11739294_a_at	1.68379	8.49761	11.4167	0.0012388	0.132916	SLC29A3	solute carrier family 29 (nucleoside transporters), member 3
11734529_x_at	2.55494	8.07246	11.4066	0.00124213	0.132916	PILRA	paired immunoglobin-like type 2 receptor alpha
11716753_x_at	1.60289	10.7546	11.3995	0.0012445	0.132916	GNS	glucosamine (N-acetyl)-6-sulfatase
11739155_s_at	-1.77059	10.7943	-11.395	0.00124598	0.132916	FAM129A	family with sequence similarity 129, member A
11722558_x_at	2.15618	9.38572	11.3901	0.00124762	0.132916	MPP1	membrane protein, palmitoylated 1, 55kDa
11732265_at	1.61021	6.74929	11.3845	0.00124949	0.132916	LILRB1	leukocyte immunoglobulin-like receptor, subfamily B (with TM and ITIM domains), member 1
11715861_a_at	-1.62253	10.1035	-11.3787	0.00125142	0.132916	ACTN4	actinin, alpha 4
11755734_x_at	-1.60819	9.42173	-11.3639	0.00125639	0.133159	CCDC107	coiled-coil domain containing 107
11731800_at	-2.02077	8.02983	-11.3424	0.00126363	0.133529	C3orf70	chromosome 3 open reading frame 70
11733074_s_at	-1.88101	9.84724	-11.3287	0.00126829	0.133529	PPP1R12A	protein phosphatase 1, regulatory subunit 12A
11719367_a_at	1.61546	9.46944	11.3125	0.00127381	0.133529	PLEKHO2	pleckstrin homology domain containing, family O member 2
11727141_s_at	2.02517	9.21678	11.3074	0.00127557	0.133529	EPB41L3	erythrocyte membrane protein band 4.1-like 3
11717860_a_at	-3.71665	10.67	-11.2986	0.00127861	0.133529	EGR1	early growth response 1
11739334_a_at	1.62107	7.35927	11.2869	0.00128262	0.133529	PTPRC	protein tyrosine phosphatase, receptor type, C
11755391_x_at	1.59094	10.6472	11.2621	0.00129122	0.133529	H2AFY	H2A histone family, member Y
11718955_a_at	-2.86961	10.2919	-11.2513	0.00129501	0.133529	FBLIM1	filamin binding LIM protein 1
11720566_at	3.01905	9.66218	11.2458	0.00129693	0.133529	BCAT1	branched chain amino-acid transaminase 1, cytosolic
11733611_a_at	1.67592	7.51724	11.2309	0.00130217	0.133529	DOCK8	dedicator of cytokinesis 8
11757848_s_at	2.99354	10.8072	11.2306	0.00130226	0.133529	CTSD	cathepsin D
11742027_a_at	-1.61332	8.03255	-11.2295	0.00130266	0.133529	ANGPT2	angiopoietin 2
11730096_a_at	3.06987	8.25332	11.2024	0.00131227	0.133529	BCL2A1	BCL2-related protein A1
11743830_a_at	-1.90647	9.77295	-11.1976	0.00131398	0.133529	PAM	peptidylglycine alpha-amidating monooxygenase
11716719_s_at	1.60821	9.25393	11.1913	0.00131623	0.133529	GLA	galactosidase, alpha
11731460_at	1.92494	7.97257	11.1855	0.00131831	0.133529	CPM	carboxypeptidase M
11748339_a_at	2.27854	8.12539	11.183	0.00131919	0.133529	LAIR1	leukocyte-associated immunoglobulin-like receptor 1
11748340_x_at	2.10374	8.15763	11.166	0.0013253	0.133529	LAIR1	leukocyte-associated immunoglobulin-like receptor 1
11723385_s_at	1.61047	7.05505	11.1651	0.00132563	0.133529	LOC100507472 /// PCSK6	uncharacterized LOC100507472 /// proprotein convertase subtilisin/kexin type 6
11725632_at	-2.5329	7.99346	-11.1604	0.00132733	0.133529	NR4A2	nuclear receptor subfamily 4, group A, member 2
11725443_at	-1.56657	7.36246	-11.1525	0.00133019	0.133529	TCEAL7	transcription elongation factor A (SII)-like 7
11756633_a_at	-1.68961	8.03312	-11.1432	0.00133358	0.133529	LIMCH1	LIM and calponin homology domains 1
11742859_a_at	2.48165	8.13902	11.1343	0.00133678	0.133529	PLEK	pleckstrin
11752510_x_at	1.71079	13.1042	11.1328	0.00133735	0.133529	PSAP	prosaposin
11753057_a_at	-2.31343	8.8386	-11.1023	0.00134855	0.133529	HSPB7	heat shock 27kDa protein family, member 7 (cardiovascular)
11721946_a_at	-2.79516	8.76567	-11.0972	0.00135042	0.133529	MRVI1	murine retrovirus integration site 1 homolog
11729424_s_at	1.5606	7.7265	11.0962	0.00135079	0.133529	CCRL2	chemokine (C-C motif) receptor-like 2
11716742_a_at	-2.23052	8.77047	-11.0942	0.00135155	0.133529	TJP2	tight junction protein 2
11758081_s_at	-1.5556	9.09602	-11.0816	0.0013562	0.133529	ENSA	endosulfine alpha
11751116_a_at	-1.89448	10.6478	-11.0742	0.00135894	0.133529	ACTN1	actinin, alpha 1
11731464_at	1.66109	8.10306	11.0594	0.00136448	0.133529	CPM	carboxypeptidase M
11722879_a_at	-2.15983	8.10191	-11.0544	0.00136636	0.133529	PPP2R2B	protein phosphatase 2, regulatory subunit B, beta
11754953_a_at	-2.43791	10.032	-11.0533	0.00136678	0.133529	C1orf198	chromosome 1 open reading frame 198
11750175_s_at	-2.55908	8.8112	-11.0452	0.00136981	0.133529	SVIL /// SVILP1	supervillin /// supervillin pseudogene 1
11722991_a_at	-2.40612	8.75963	-11.0377	0.00137266	0.133529	DMD	dystrophin
11741184_a_at	1.6016	7.56258	11.0284	0.00137617	0.133529	AMPD3	adenosine monophosphate deaminase 3
11727162_x_at	-1.93521	9.53251	-11.0262	0.00137702	0.133529	NFIX	nuclear factor I/X (CCAAT-binding transcription factor)
11758394_s_at	-2.10226	8.84996	-11.0224	0.00137844	0.133529	PARM1	prostate androgen-regulated mucin-like protein 1
11754461_s_at	2.83097	9.00862	11.018	0.00138012	0.133529	UCP2	uncoupling protein 2 (mitochondrial, proton carrier)
11720538_at	1.59501	7.52022	10.992	0.00139007	0.133529	FLVCR2	feline leukemia virus subgroup C cellular receptor family, member 2
11757933_s_at	-1.64431	11.0863	-10.991	0.00139043	0.133529	BTG2	BTG family, member 2
11718904_s_at	-3.28987	10.8294	-10.9817	0.00139404	0.133529	FILIP1L	filamin A interacting protein 1-like
11763776_a_at	1.96197	8.70176	10.9762	0.00139614	0.133529	THEMIS2	thymocyte selection associated family member 2
11739813_a_at	-1.54049	9.87271	-10.9722	0.0013977	0.133529	FZD1	frizzled family receptor 1
11719263_x_at	-2.00042	8.45815	-10.9706	0.00139831	0.133529	SMTN	smoothelin
11754941_x_at	-1.66051	7.69833	-10.9694	0.00139879	0.133529	KRT18	keratin 18
11715776_a_at	-3.79804	9.8551	-10.9668	0.00139977	0.133529	HSPB8	heat shock 22kDa protein 8
11730090_a_at	1.54398	9.75759	10.965	0.00140048	0.133529	TNFSF12 /// TNFSF12-TNFSF13 /// TNFSF13	tumor necrosis factor (ligand) superfamily, member 12 /// TNFSF12-TNFSF13 readthrough /// tumor necrosis factor (ligand) superfamily, member 13
11721945_a_at	-3.10486	9.17754	-10.9561	0.00140394	0.133529	MRVI1	murine retrovirus integration site 1 homolog
11735352_x_at	2.41035	8.44167	10.9548	0.00140446	0.133529	SLC37A2	solute carrier family 37 (glycerol-3-phosphate transporter), member 2
11749118_a_at	-2.17634	7.97772	-10.9349	0.00141221	0.133529	SORBS1	sorbin and SH3 domain containing 1
11725006_a_at	-1.65609	7.86479	-10.9224	0.00141713	0.133529	ARHGEF25	Rho guanine nucleotide exchange factor (GEF) 25
11748517_a_at	1.63184	8.28548	10.9198	0.00141815	0.133529	ACP2	acid phosphatase 2, lysosomal
11743644_a_at	-1.59132	8.22926	-10.8929	0.0014288	0.133529	MXRA7	matrix-remodelling associated 7
11756766_x_at	1.83492	10.5669	10.8844	0.00143222	0.133529	CD74	CD74 molecule, major histocompatibility complex, class II invariant chain
11717993_at	-2.14889	9.28037	-10.877	0.00143514	0.133529	CBX7	chromobox homolog 7
11727565_a_at	1.664	8.38218	10.8747	0.0014361	0.133529	TNFSF13B	tumor necrosis factor (ligand) superfamily, member 13b
11722458_a_at	1.55089	7.86656	10.8738	0.00143643	0.133529	TMEM206	transmembrane protein 206
11733084_a_at	-2.55077	10.8559	-10.8644	0.0014402	0.133529	PALLD	palladin, cytoskeletal associated protein
11729000_x_at	2.58873	8.4005	10.8606	0.00144174	0.133529	CD84	CD84 molecule
11732111_a_at	1.82093	8.63618	10.8595	0.00144218	0.133529	TNFRSF21	tumor necrosis factor receptor superfamily, member 21
11726079_x_at	-1.78608	7.42096	-10.8566	0.00144335	0.133529	GALNT15	UDP-N-acetyl-alpha-D-galactosamine:polypeptide N-acetylgalactosaminyltransferase 15
11724877_a_at	-1.52402	7.21306	-10.8446	0.00144822	0.133529	AEBP2	AE binding protein 2
11721236_a_at	1.6148	8.0878	10.8433	0.00144874	0.133529	LHFPL2	lipoma HMGIC fusion partner-like 2
11716558_at	-2.31576	9.63978	-10.8424	0.00144912	0.133529	TNS1	tensin 1
11733324_x_at	1.63328	7.46649	10.8374	0.00145112	0.133529	DOPEY2	dopey family member 2
11733355_x_at	2.4853	8.58547	10.8283	0.00145482	0.133529	C5AR1	complement component 5a receptor 1
11755280_x_at	1.87291	14.3239	10.8261	0.00145574	0.133529	FTL	ferritin, light polypeptide
11717827_a_at	1.68202	10.2151	10.8083	0.00146302	0.133529	DBI	diazepam binding inhibitor (GABA receptor modulator, acyl-CoA binding protein)
11749255_x_at	1.72632	8.87971	10.8028	0.00146527	0.133529	ACP2	acid phosphatase 2, lysosomal
11756800_a_at	1.66766	7.54256	10.793	0.00146932	0.133529	CELSR1	cadherin, EGF LAG seven-pass G-type receptor 1
11756591_a_at	-1.58038	9.13631	-10.7912	0.00147005	0.133529	MBNL1	muscleblind-like splicing regulator 1
11731553_a_at	-2.26455	8.67046	-10.7847	0.00147278	0.133529	SYNPO2	synaptopodin 2
11720998_a_at	1.62328	7.37271	10.7769	0.00147598	0.133529	BIN2	bridging integrator 2
11733946_at	1.75235	10.0302	10.7739	0.00147723	0.133529	RAP2B	RAP2B, member of RAS oncogene family
11721710_a_at	-1.95303	7.05828	-10.7714	0.00147827	0.133529	LOC100996628 /// SHROOM3	uncharacterized LOC100996628 /// shroom family member 3
11746961_a_at	2.31713	8.44823	10.7652	0.00148088	0.133529	HLA-DMB	major histocompatibility complex, class II, DM beta
11740080_at	1.99232	7.49648	10.7637	0.00148148	0.133529	CXorf21	chromosome X open reading frame 21
11732670_a_at	-1.51442	9.7937	-10.7531	0.00148591	0.133529	CCDC107	coiled-coil domain containing 107
11729995_a_at	-1.78726	7.5497	-10.7446	0.00148949	0.133529	GDF10	growth differentiation factor 10
11746894_x_at	1.9643	8.90698	10.7358	0.00149322	0.133529	MPP1	membrane protein, palmitoylated 1, 55kDa
11747774_a_at	2.20124	7.47563	10.7228	0.00149871	0.133529	SLC11A1	solute carrier family 11 (proton-coupled divalent metal ion transporters), member 1
11724046_a_at	1.53575	8.03386	10.7218	0.00149911	0.133529	BID	BH3 interacting domain death agonist
11751943_a_at	-1.5057	7.34356	-10.7195	0.00150011	0.133529	LRCH2	leucine-rich repeats and calponin homology (CH) domain containing 2
11745377_x_at	-1.91575	9.61076	-10.7115	0.00150352	0.133529	PTRF	polymerase I and transcript release factor
11733584_a_at	3.54787	7.77307	10.7032	0.00150706	0.133529	TM4SF19 /// TM4SF19-TCTEX1D2	transmembrane 4 L six family member 19 /// TM4SF19-TCTEX1D2 readthrough
11732672_x_at	-1.7089	9.39089	-10.702	0.00150757	0.133529	CCDC107	coiled-coil domain containing 107
11724875_a_at	4.84094	8.97285	10.6988	0.00150895	0.133529	CD36	CD36 molecule (thrombospondin receptor)
11758489_s_at	-1.86806	8.49484	-10.6935	0.00151119	0.133529	LOC100996628 /// SHROOM3	uncharacterized LOC100996628 /// shroom family member 3
11760186_at	-3.04867	8.56358	-10.6837	0.00151542	0.133529	ACTA2	actin, alpha 2, smooth muscle, aorta
11744848_x_at	-1.61793	7.25615	-10.6662	0.00152294	0.133529	PRR16	proline rich 16
11726255_x_at	1.8157	11.1758	10.6645	0.0015237	0.133529	CD74	CD74 molecule, major histocompatibility complex, class II invariant chain
11736229_a_at	-3.05623	10.0679	-10.6534	0.00152853	0.133529	CRIM1	cysteine rich transmembrane BMP regulator 1 (chordin-like)
11733248_a_at	-1.49966	10.7309	-10.6492	0.00153035	0.133529	DBNDD2 /// SYS1 /// SYS1-DBNDD2	dysbindin (dystrobrevin binding protein 1) domain containing 2 /// SYS1 Golgi-localized integral membrane protein homolog (S. cerevisiae) /// SYS1-DBNDD2 readthrough (NMD candidate)
11739847_x_at	3.52715	9.00991	10.6336	0.00153718	0.133529	MSR1	macrophage scavenger receptor 1
11755214_a_at	-2.22937	9.05278	-10.6313	0.00153819	0.133529	TMTC1	transmembrane and tetratricopeptide repeat containing 1
11723644_a_at	-4.64798	10.0711	-10.6293	0.00153904	0.133529	PLN	phospholamban
11757787_x_at	1.96265	14.3077	10.629	0.00153918	0.133529	FTL	ferritin, light polypeptide
11754989_a_at	2.02158	8.35476	10.6225	0.00154204	0.133529	DMXL2	Dmx-like 2
11738617_s_at	1.48992	7.03043	10.6135	0.00154603	0.133529	MYO7A	myosin VIIA
11720612_x_at	-1.61667	7.96541	-10.6092	0.00154791	0.133529	NAP1L5	nucleosome assembly protein 1-like 5
11726797_x_at	-2.95173	9.10507	-10.6083	0.0015483	0.133529	NEXN	nexilin (F actin binding protein)
11763314_s_at	1.65961	7.92853	10.5997	0.0015521	0.133529	ARL4C	ADP-ribosylation factor-like 4C
11754911_x_at	-3.26874	9.00291	-10.5991	0.00155238	0.133529	NEXN	nexilin (F actin binding protein)
11719308_a_at	1.78265	8.02172	10.5985	0.00155266	0.133529	RASSF4	Ras association (RalGDS/AF-6) domain family member 4
11715615_at	-1.60213	9.22556	-10.5972	0.00155324	0.133529	BTG2	BTG family, member 2
11755932_a_at	1.7947	8.86271	10.5862	0.00155813	0.133529	HCLS1	hematopoietic cell-specific Lyn substrate 1
11742911_at	1.97461	7.60679	10.5853	0.00155854	0.133529	IGSF6	immunoglobulin superfamily, member 6
11752561_a_at	-2.33641	8.83429	-10.5781	0.00156174	0.133529	CDH13	cadherin 13, H-cadherin (heart)
11739277_at	1.66047	8.49238	10.5768	0.00156233	0.133529	SDC3	syndecan 3
11719823_at	-1.50109	9.42259	-10.5753	0.00156299	0.133529	ZAK	sterile alpha motif and leucine zipper containing kinase AZK
11721700_a_at	-2.53405	8.4426	-10.5463	0.00157605	0.133529	RERG	RAS-like, estrogen-regulated, growth inhibitor
11715423_s_at	1.49401	11.0983	10.5444	0.00157691	0.133529	BCAP31	B-cell receptor-associated protein 31
11756547_a_at	-3.23591	12.293	-10.5424	0.00157781	0.133529	CLU	clusterin
11754474_a_at	3.37523	8.55087	10.5417	0.00157815	0.133529	PLEK	pleckstrin
11756780_a_at	1.80421	8.01003	10.5324	0.00158239	0.133529	MS4A7	membrane-spanning 4-domains, subfamily A, member 7
11745509_a_at	1.88283	7.10073	10.5318	0.00158263	0.133529	IQGAP2	IQ motif containing GTPase activating protein 2
11723106_a_at	1.55621	7.90731	10.5284	0.00158418	0.133529	NCF4	neutrophil cytosolic factor 4, 40kDa
11726496_at	-1.80339	7.46271	-10.5256	0.00158546	0.133529	RYR2	ryanodine receptor 2 (cardiac)
11751801_a_at	-1.50365	9.64984	-10.524	0.0015862	0.133529	CCDC107	coiled-coil domain containing 107
11749510_a_at	1.76427	9.15716	10.5237	0.00158633	0.133529	SAMHD1	SAM domain and HD domain 1
11718936_s_at	1.8033	8.95004	10.51	0.00159263	0.133686	MMD	monocyte to macrophage differentiation-associated
11740188_at	1.70653	6.61124	10.5006	0.00159694	0.133686	ARL11	ADP-ribosylation factor-like 11
11739606_x_at	1.4757	9.5819	10.4968	0.00159868	0.133686	CCDC88A	coiled-coil domain containing 88A
11725702_a_at	3.13968	9.00334	10.4707	0.00161083	0.133686	AQP9	aquaporin 9
11726559_s_at	3.72814	10.7194	10.4675	0.0016123	0.133686	LCP1	lymphocyte cytosolic protein 1 (L-plastin)
11724013_a_at	1.73955	8.09446	10.4675	0.00161231	0.133686	SOAT1	sterol O-acyltransferase 1
11723785_s_at	-2.75057	9.74437	-10.4659	0.00161304	0.133686	LIMCH1	LIM and calponin homology domains 1
11740358_a_at	1.4852	6.8739	10.4646	0.00161365	0.133686	LILRB5	leukocyte immunoglobulin-like receptor, subfamily B (with TM and ITIM domains), member 5
11726122_at	1.63807	8.42481	10.4641	0.00161387	0.133686	MYO1F	myosin IF
11735319_a_at	-1.80771	8.43008	-10.4504	0.00162031	0.133686	RBMS3	RNA binding motif, single stranded interacting protein 3
11749016_a_at	1.73229	7.50078	10.4485	0.00162119	0.133686	AMPD3	adenosine monophosphate deaminase 3
11719778_s_at	-3.37621	9.20527	-10.4435	0.00162356	0.133686	FOXC1	forkhead box C1
11723335_s_at	1.48927	7.86029	10.4336	0.0016282	0.133686	GMIP	GEM interacting protein
11758111_s_at	-2.96141	9.13715	-10.4278	0.00163095	0.133686	FOXC1	forkhead box C1
11717355_a_at	-1.58193	8.57992	-10.4245	0.00163254	0.133686	FEZ1	fasciculation and elongation protein zeta 1 (zygin I)
11736259_a_at	-1.48377	8.82692	-10.4202	0.00163456	0.133686	SSPN	sarcospan
11746658_a_at	1.46284	7.3209	10.4202	0.00163458	0.133686	CD86	CD86 molecule
11726034_a_at	2.0707	7.98129	10.4016	0.00164347	0.133686	PTPN6	protein tyrosine phosphatase, non-receptor type 6
11730942_s_at	1.50849	7.3861	10.3967	0.00164581	0.133686	OSCAR	osteoclast associated, immunoglobulin-like receptor
11758000_s_at	2.20543	8.50932	10.3821	0.00165284	0.133686	CXADR	coxsackie virus and adenovirus receptor
11727161_a_at	-2.43282	9.46416	-10.3803	0.00165368	0.133686	NFIX	nuclear factor I/X (CCAAT-binding transcription factor)
11737486_s_at	-1.63256	8.92184	-10.3769	0.0016553	0.133686	SRF	serum response factor (c-fos serum response element-binding transcription factor)
11757871_s_at	-2.40509	9.26748	-10.3768	0.00165536	0.133686	PBX1	pre-B-cell leukemia homeobox 1
11724554_s_at	-1.6263	9.33823	-10.3445	0.0016711	0.133686	PCGF5	polycomb group ring finger 5
11724723_a_at	-1.69449	8.18017	-10.3174	0.00168439	0.133686	HSPA2	heat shock 70kDa protein 2
11730383_a_at	-1.67121	10.0402	-10.3077	0.00168921	0.133686	SNX18	sorting nexin 18
11722225_a_at	1.89883	8.76699	10.3033	0.0016914	0.133686	ADAM8	ADAM metallopeptidase domain 8
11743986_at	-1.6035	8.93068	-10.3009	0.00169262	0.133686	AKAP1	A kinase (PRKA) anchor protein 1
11758438_s_at	4.51324	8.71923	10.2974	0.00169435	0.133686	CD36	CD36 molecule (thrombospondin receptor)
11753549_a_at	1.51366	9.1189	10.2968	0.00169462	0.133686	CMTM3	CKLF-like MARVEL transmembrane domain containing 3
11746721_a_at	2.73294	8.79395	10.2895	0.00169826	0.133686	TREM1	triggering receptor expressed on myeloid cells 1
11746008_x_at	-3.23775	9.10626	-10.2858	0.00170011	0.133686	NEXN	nexilin (F actin binding protein)
11728421_a_at	2.85253	7.6562	10.2852	0.00170041	0.133686	PLA2G7	phospholipase A2, group VII (platelet-activating factor acetylhydrolase, plasma)
11754279_a_at	-1.5549	8.00763	-10.2846	0.00170075	0.133686	MYEF2	myelin expression factor 2
11733616_at	1.44369	8.16076	10.2662	0.00170999	0.133686	HNMT	histamine N-methyltransferase
11754122_x_at	1.54298	9.9204	10.2658	0.00171019	0.133686	DBI	diazepam binding inhibitor (GABA receptor modulator, acyl-CoA binding protein)
11736247_x_at	-2.89928	9.62163	-10.2584	0.00171393	0.133686	AMIGO2	adhesion molecule with Ig-like domain 2
11716309_a_at	-1.44154	9.29311	-10.2579	0.00171419	0.133686	CYBRD1	cytochrome b reductase 1
200078_PM_s_at	1.44021	10.4474	10.2578	0.00171423	0.133686	ATP6V0B	ATPase, H+ transporting, lysosomal 21kDa, V0 subunit b
11719480_a_at	2.28458	8.37392	10.2483	0.00171901	0.133686	CSTA	cystatin A (stefin A)
11719736_s_at	1.44452	8.00674	10.2419	0.00172228	0.133686	FAM134B	family with sequence similarity 134, member B
11731461_x_at	2.1635	7.82191	10.2411	0.00172269	0.133686	CPM	carboxypeptidase M
11722270_at	1.87343	7.81685	10.2362	0.00172519	0.133686	SASH3	SAM and SH3 domain containing 3
11756011_a_at	2.00388	7.99033	10.2362	0.0017252	0.133686	PTPRJ	protein tyrosine phosphatase, receptor type, J
11752509_s_at	1.6688	13.6221	10.2343	0.00172616	0.133686	PSAP	prosaposin
11731722_a_at	1.48518	8.45975	10.2326	0.00172704	0.133686	ALDH3B1	aldehyde dehydrogenase 3 family, member B1
11734305_a_at	1.43682	8.24642	10.2312	0.00172776	0.133686	LACTB	lactamase, beta
11721068_a_at	-1.65247	8.20645	-10.2297	0.00172852	0.133686	FHOD3	formin homology 2 domain containing 3
11752745_x_at	2.37896	11.273	10.2258	0.00173051	0.133686	LGMN	legumain
11720315_x_at	1.4373	10.5779	10.2216	0.00173264	0.133686	ATP6V0B	ATPase, H+ transporting, lysosomal 21kDa, V0 subunit b
11750804_a_at	-2.19049	8.47433	-10.2119	0.00173763	0.133686	LIMCH1	LIM and calponin homology domains 1
11749921_a_at	-1.66079	8.85445	-10.2073	0.00174001	0.133686	SDC4	syndecan 4
11758335_s_at	1.46027	9.28377	10.1934	0.00174721	0.133686	FDX1	ferredoxin 1
11715207_at	1.6831	7.88918	10.1913	0.00174829	0.133686	WDFY4	WDFY family member 4
11724955_s_at	1.6693	7.92409	10.1765	0.00175601	0.133686	MRC1	mannose receptor, C type 1
11754442_x_at	-3.95376	10.0599	-10.1744	0.00175713	0.133686	ELN	elastin
11732456_a_at	1.93392	7.32607	10.174	0.00175729	0.133686	MARCH1	membrane-associated ring finger (C3HC4) 1, E3 ubiquitin protein ligase
11724080_x_at	-1.94572	8.47922	-10.165	0.00176204	0.133686	COL21A1	collagen, type XXI, alpha 1
11721218_a_at	-3.06027	9.49804	-10.1637	0.00176269	0.133686	MSRB3	methionine sulfoxide reductase B3
11729874_at	1.46764	7.4166	10.1534	0.00176813	0.133686	SIGLEC9	sialic acid binding Ig-like lectin 9
11757812_s_at	-2.68315	9.70056	-10.1481	0.00177093	0.133686	INPP5A	inositol polyphosphate-5-phosphatase, 40kDa
11754360_a_at	1.4246	7.14142	10.146	0.00177203	0.133686	RRM2	ribonucleotide reductase M2
11726802_a_at	-1.49879	8.33067	-10.1397	0.00177534	0.133686	EBF1	early B-cell factor 1
11715422_a_at	1.55473	11.336	10.1388	0.00177583	0.133686	BCAP31	B-cell receptor-associated protein 31
11733698_s_at	1.44297	10.8509	10.1362	0.00177722	0.133686	SGK1	serum/glucocorticoid regulated kinase 1
11739080_s_at	-1.68109	8.77431	-10.13	0.00178053	0.133686	DNAJB4	DnaJ (Hsp40) homolog, subfamily B, member 4
11764021_x_at	-1.43025	9.75126	-10.1221	0.00178472	0.133686	CAMTA1	calmodulin binding transcription activator 1
11720379_s_at	1.627	8.72967	10.1172	0.00178735	0.133686	GALNS	galactosamine (N-acetyl)-6-sulfate sulfatase
11732415_s_at	1.96468	7.83328	10.1161	0.00178793	0.133686	TIAM1	T-cell lymphoma invasion and metastasis 1
11756897_x_at	-2.03861	9.1174	-10.1156	0.00178818	0.133686	TJP2	tight junction protein 2
11716291_s_at	-1.46329	10.093	-10.114	0.00178905	0.133686	HNRNPA0	heterogeneous nuclear ribonucleoprotein A0
11748516_a_at	-1.42535	7.36778	-10.1128	0.00178972	0.133686	NAP1L5	nucleosome assembly protein 1-like 5
11720637_x_at	1.46137	7.25488	10.1117	0.0017903	0.133686	CXADR	coxsackie virus and adenovirus receptor
11732481_a_at	2.33656	8.06972	10.1087	0.00179191	0.133686	ITGAM	integrin, alpha M (complement component 3 receptor 3 subunit)
11718419_at	3.57392	10.0896	10.1057	0.00179352	0.133686	FCER1G	Fc fragment of IgE, high affinity I, receptor for; gamma polypeptide
11724769_x_at	2.04059	9.26724	10.1027	0.00179511	0.133686	FCGR2A	Fc fragment of IgG, low affinity IIa, receptor (CD32)
11720302_a_at	2.10891	8.72282	10.1007	0.00179616	0.133686	SLA	Src-like-adaptor
11758009_s_at	1.87065	7.58147	10.0874	0.00180335	0.134007	AMPD3	adenosine monophosphate deaminase 3
11751276_x_at	-1.46844	8.9744	-10.0827	0.00180589	0.134007	CALCOCO2	calcium binding and coiled-coil domain 2
11754925_a_at	2.5915	8.19015	10.0663	0.00181482	0.134468	SYK	spleen tyrosine kinase
11720850_a_at	-1.46254	8.4177	-10.0509	0.00182325	0.13483	RAB23	RAB23, member RAS oncogene family
11731227_a_at	2.76315	7.72178	10.0474	0.00182516	0.13483	MATK	megakaryocyte-associated tyrosine kinase
11716744_x_at	-2.24301	9.14136	-10.0423	0.001828	0.134839	TJP2	tight junction protein 2
11741396_s_at	1.40852	7.56546	10.0175	0.0018417	0.1353	GGT1 /// GGT2 /// GGT3P /// GGTLC1 /// GGTLC2 /// LOC101060682	gamma-glutamyltransferase 1 /// gamma-glutamyltransferase 2 /// gamma-glutamyltransferase 3 pseudogene /// gamma-glutamyltransferase light chain 1 /// gamma-glutamyltransferase light chain 2 /// gamma-glutamyltranspeptidase 2-like
11750531_a_at	1.79274	8.56746	10.0093	0.00184626	0.1353	PYCARD	PYD and CARD domain containing
11720853_a_at	-1.41448	7.47469	-9.99227	0.00185579	0.1353	NFIA	nuclear factor I/A
11727970_a_at	-2.41131	7.52955	-9.99151	0.00185622	0.1353	SLC14A1	solute carrier family 14 (urea transporter), member 1 (Kidd blood group)
11758230_s_at	-2.61519	9.50606	-9.99109	0.00185645	0.1353	NFIA	nuclear factor I/A
11718084_a_at	1.42962	8.31243	9.98987	0.00185714	0.1353	LYN	v-yes-1 Yamaguchi sarcoma viral related oncogene homolog
11739453_a_at	1.40783	8.41025	9.98531	0.00185971	0.1353	ME2	malic enzyme 2, NAD(+)-dependent, mitochondrial
11715424_x_at	1.40197	11.2943	9.98474	0.00186002	0.1353	BCAP31	B-cell receptor-associated protein 31
11741175_a_at	-2.00203	8.97588	-9.98347	0.00186074	0.1353	KCNMB1	potassium large conductance calcium-activated channel, subfamily M, beta member 1
11753454_a_at	-1.40224	7.65339	-9.97263	0.00186686	0.1353	PRKG1	protein kinase, cGMP-dependent, type I
11730374_a_at	2.20795	8.50791	9.97073	0.00186794	0.1353	FYB	FYN binding protein
11725916_a_at	-1.45396	7.5698	-9.96625	0.00187048	0.1353	BVES	blood vessel epicardial substance
11719805_a_at	-1.81378	9.06677	-9.96537	0.00187098	0.1353	ASPN	asporin
11732349_at	2.21164	7.85527	9.96088	0.00187353	0.1353	LILRA6	leukocyte immunoglobulin-like receptor, subfamily A (with TM domain), member 6
11745504_a_at	2.13021	8.69529	9.95785	0.00187525	0.1353	MPP1	membrane protein, palmitoylated 1, 55kDa
11721169_a_at	2.50353	8.68302	9.94787	0.00188094	0.135513	PYCARD	PYD and CARD domain containing
11720313_a_at	1.49432	10.5095	9.93462	0.00188854	0.135624	ATP6V0B	ATPase, H+ transporting, lysosomal 21kDa, V0 subunit b
11756370_x_at	-1.39543	10.8071	-9.93215	0.00188996	0.135624	CRIP2	cysteine-rich protein 2
11752118_x_at	-1.40711	8.59332	-9.91578	0.00189941	0.135624	TBXA2R	thromboxane A2 receptor
11746893_a_at	2.11282	9.09857	9.91444	0.00190019	0.135624	MPP1	membrane protein, palmitoylated 1, 55kDa
11728306_s_at	-2.162	8.89598	-9.90543	0.00190541	0.135624	GULP1	GULP, engulfment adaptor PTB domain containing 1
11755830_a_at	1.40217	7.92364	9.90055	0.00190825	0.135624	MYO1G	myosin IG
11732514_s_at	1.39039	7.85724	9.89324	0.00191252	0.135624	LYN	v-yes-1 Yamaguchi sarcoma viral related oncogene homolog
11726291_a_at	-1.42753	8.71919	-9.89069	0.00191401	0.135624	LRRC17	leucine rich repeat containing 17
11747474_a_at	-1.54016	8.71039	-9.89067	0.00191402	0.135624	NR4A2	nuclear receptor subfamily 4, group A, member 2
11743564_x_at	-1.56487	8.66828	-9.88045	0.00192001	0.135624	MAP7D3	MAP7 domain containing 3
11739845_a_at	3.40399	8.84326	9.88006	0.00192024	0.135624	MSR1	macrophage scavenger receptor 1
11719412_at	-1.54886	7.3286	-9.8795	0.00192057	0.135624	PBX1	pre-B-cell leukemia homeobox 1
11732335_at	1.39113	8.02795	9.85994	0.0019321	0.135624	SLC31A1	solute carrier family 31 (copper transporters), member 1
11758593_s_at	-1.78834	9.61706	-9.85823	0.00193312	0.135624	H3F3A /// H3F3B /// MIR4738	H3 histone, family 3A /// H3 histone, family 3B (H3.3B) /// microRNA 4738
11718007_a_at	-1.83046	8.25613	-9.85584	0.00193453	0.135624	MYLIP	myosin regulatory light chain interacting protein
11736260_a_at	-1.67609	8.88844	-9.85535	0.00193483	0.135624	SSPN	sarcospan
11759302_at	-1.52842	9.1499	-9.85333	0.00193603	0.135624	ROCK2	Rho-associated, coiled-coil containing protein kinase 2
11718824_at	-1.40552	8.58719	-9.85196	0.00193684	0.135624	IGIP	IgA-inducing protein homolog (Bos taurus)
11725927_a_at	-1.8319	10.4024	-9.84991	0.00193806	0.135624	CLIC4	chloride intracellular channel 4
11739667_at	1.52463	7.19219	9.84945	0.00193833	0.135624	GALNT6	UDP-N-acetyl-alpha-D-galactosamine:polypeptide N-acetylgalactosaminyltransferase 6 (GalNAc-T6)
11716222_a_at	3.41016	11.8017	9.84202	0.00194276	0.135624	RNASE1	ribonuclease, RNase A family, 1 (pancreatic)
11750654_s_at	-1.38267	9.30621	-9.84199	0.00194277	0.135624	ITPR1	inositol 1,4,5-trisphosphate receptor, type 1
11743350_a_at	2.81768	8.4355	9.81957	0.0019562	0.136217	C15orf48	chromosome 15 open reading frame 48
11755523_a_at	1.85106	7.57957	9.81864	0.00195676	0.136217	RBM47	RNA binding motif protein 47
11739069_s_at	1.59323	13.3616	9.80355	0.00196588	0.136445	PSAP	prosaposin
11755564_x_at	2.46984	9.27386	9.78085	0.00197969	0.136445	CCL3L1 /// CCL3L3	chemokine (C-C motif) ligand 3-like 1 /// chemokine (C-C motif) ligand 3-like 3
11723585_a_at	2.36924	7.851	9.78075	0.00197975	0.136445	SMPDL3A	sphingomyelin phosphodiesterase, acid-like 3A
11722802_at	-1.98192	8.57274	-9.77536	0.00198305	0.136445	GNAI1	guanine nucleotide binding protein (G protein), alpha inhibiting activity polypeptide 1
11720300_a_at	1.80064	8.46107	9.77234	0.0019849	0.136445	SLA	Src-like-adaptor
11720994_x_at	3.34025	9.32954	9.77086	0.00198581	0.136445	CCL3 /// LOC101060267	chemokine (C-C motif) ligand 3 /// c-C motif chemokine 3-like
11754008_x_at	-1.81133	10.1166	-9.75846	0.00199344	0.136445	ID3	inhibitor of DNA binding 3, dominant negative helix-loop-helix protein
11730943_x_at	1.5109	7.76589	9.75593	0.00199501	0.136445	OSCAR	osteoclast associated, immunoglobulin-like receptor
11757728_s_at	1.45167	14.6338	9.75135	0.00199784	0.136445	FTL	ferritin, light polypeptide
11727998_a_at	-1.60665	6.95671	-9.74723	0.00200039	0.136445	MYEF2	myelin expression factor 2
11732084_a_at	1.77405	6.73818	9.7461	0.00200109	0.136445	TFEC	transcription factor EC
11719554_at	3.51206	9.7174	9.74498	0.00200179	0.136445	CTSS	cathepsin S
11735045_at	2.29118	7.43989	9.74442	0.00200213	0.136445	ATP6V0D2	ATPase, H+ transporting, lysosomal 38kDa, V0 subunit d2
11744715_a_at	1.80122	8.45175	9.74048	0.00200458	0.136445	SLC38A6	solute carrier family 38, member 6
11719414_a_at	-1.86871	9.3087	-9.73758	0.00200638	0.136445	PBX1	pre-B-cell leukemia homeobox 1
11743253_x_at	-3.22829	9.85354	-9.73233	0.00200965	0.136445	CALD1	caldesmon 1
11724997_a_at	1.81627	7.70583	9.72499	0.00201423	0.136445	CD86	CD86 molecule
11733841_a_at	1.59697	7.88524	9.72365	0.00201508	0.136445	EVI2A	ecotropic viral integration site 2A
11717441_a_at	-1.41635	8.55492	-9.72304	0.00201545	0.136445	EPS8	epidermal growth factor receptor pathway substrate 8
11737095_a_at	-2.13893	8.39625	-9.72057	0.002017	0.136445	CFL2	cofilin 2 (muscle)
11715440_a_at	-3.22358	11.4187	-9.71909	0.00201793	0.136445	CTGF	connective tissue growth factor
11716131_s_at	-1.38446	8.17371	-9.71314	0.00202167	0.136511	FSTL3	follistatin-like 3 (secreted glycoprotein)
11746972_a_at	1.52073	7.42105	9.70406	0.00202739	0.136511	MARCH1	membrane-associated ring finger (C3HC4) 1, E3 ubiquitin protein ligase
11716373_a_at	-1.87278	9.02661	-9.69142	0.00203538	0.136511	PTK2	protein tyrosine kinase 2
11724759_s_at	-1.36052	11.0159	-9.69134	0.00203543	0.136511	CALM1 /// CALM2 /// CALM3	calmodulin 1 (phosphorylase kinase, delta) /// calmodulin 2 (phosphorylase kinase, delta) /// calmodulin 3 (phosphorylase kinase, delta)
11755567_x_at	-1.37463	8.50961	-9.68674	0.00203835	0.136511	DMPK	dystrophia myotonica-protein kinase
11715478_a_at	1.66431	7.54872	9.67898	0.00204329	0.136511	TFRC	transferrin receptor (p90, CD71)
11716871_at	1.52061	9.13889	9.67686	0.00204463	0.136511	GAA	glucosidase, alpha; acid
11760710_a_at	1.4037	8.07951	9.67584	0.00204529	0.136511	MS4A6A	membrane-spanning 4-domains, subfamily A, member 6A
11758201_s_at	-1.38488	9.95211	-9.65992	0.00205548	0.136511	IMPAD1	inositol monophosphatase domain containing 1
11733979_at	1.86442	7.46215	9.65553	0.00205831	0.136511	CD28	CD28 molecule
11757742_x_at	1.47296	8.23421	9.65501	0.00205863	0.136511	PLEKHB2	pleckstrin homology domain containing, family B (evectins) member 2
11721728_a_at	2.07525	8.16927	9.65379	0.00205943	0.136511	ARHGAP30	Rho GTPase activating protein 30
11739553_a_at	1.53807	7.59018	9.65034	0.00206165	0.136511	GAS7	growth arrest-specific 7
11749164_a_at	1.39203	7.87221	9.64862	0.00206276	0.136511	TMEM206	transmembrane protein 206
11763606_a_at	1.92734	7.7415	9.64728	0.00206362	0.136511	VAV1	vav 1 guanine nucleotide exchange factor
11723033_at	-3.43935	10.1115	-9.64269	0.00206659	0.136511	NOV	nephroblastoma overexpressed
11742028_a_at	-1.76352	8.1635	-9.63856	0.00206926	0.136511	ANGPT2	angiopoietin 2
11716195_a_at	-1.37191	9.76764	-9.63327	0.00207269	0.136511	ID1	inhibitor of DNA binding 1, dominant negative helix-loop-helix protein
11726538_x_at	-2.28302	8.60861	-9.62517	0.00207796	0.136511	KANK2	KN motif and ankyrin repeat domains 2
11748859_a_at	1.35115	6.6527	9.62497	0.00207809	0.136511	TFEC	transcription factor EC
11743984_a_at	-1.35251	8.26595	-9.6221	0.00207996	0.136511	AKAP1	A kinase (PRKA) anchor protein 1
11756174_s_at	3.64403	9.95838	9.61985	0.00208144	0.136511	SCD	stearoyl-CoA desaturase (delta-9-desaturase)
11756867_a_at	1.35166	8.00407	9.61454	0.0020849	0.136511	TNFSF13B	tumor necrosis factor (ligand) superfamily, member 13b
11758182_x_at	1.79295	14.2907	9.60796	0.00208922	0.136511	FTL	ferritin, light polypeptide
11751275_a_at	-1.41585	8.93857	-9.60155	0.00209343	0.136511	CALCOCO2	calcium binding and coiled-coil domain 2
11726800_at	-2.04161	8.83953	-9.60062	0.00209404	0.136511	EBF1	early B-cell factor 1
11723228_s_at	-1.54073	8.23405	-9.60015	0.00209435	0.136511	SGCB	sarcoglycan, beta (43kDa dystrophin-associated glycoprotein)
11715806_a_at	-1.3842	10.7057	-9.59279	0.0020992	0.136511	SEPW1	selenoprotein W, 1
11733162_a_at	1.3456	7.84499	9.5852	0.00210422	0.136511	PSTPIP1	proline-serine-threonine phosphatase interacting protein 1
11748126_a_at	1.58879	9.82739	9.58327	0.0021055	0.136511	TIMP2	TIMP metallopeptidase inhibitor 2
11746965_a_at	2.02487	8.63847	9.58251	0.00210601	0.136511	ANPEP	alanyl (membrane) aminopeptidase
11749223_a_at	-1.6886	9.17698	-9.58074	0.00210718	0.136511	PTRF	polymerase I and transcript release factor
11724913_s_at	-1.41809	10.191	-9.57211	0.00211291	0.136554	ILK	integrin-linked kinase
11740194_a_at	1.44746	10.4091	9.57144	0.00211336	0.136554	ATP6V0B	ATPase, H+ transporting, lysosomal 21kDa, V0 subunit b
11728669_a_at	-1.34598	9.02317	-9.56731	0.00211611	0.136554	UBE2H	ubiquitin-conjugating enzyme E2H
11763522_a_at	-1.99541	7.41382	-9.55449	0.00212469	0.136929	RYR2	ryanodine receptor 2 (cardiac)
11728603_a_at	1.35507	7.04741	9.54959	0.00212799	0.136963	CLDN23	claudin 23
11748602_a_at	-2.25053	7.70436	-9.54483	0.00213119	0.136991	BAG2	BCL2-associated athanogene 2
11745624_s_at	-1.81085	7.07206	-9.5363	0.00213694	0.137042	INADL	InaD-like (Drosophila)
11754440_s_at	-1.96487	10.2379	-9.5329	0.00213924	0.137042	GAS6	growth arrest-specific 6
11758377_s_at	1.88004	7.79373	9.52369	0.00214549	0.137042	TLR1	toll-like receptor 1
11756106_a_at	-1.49151	7.78226	-9.52045	0.00214769	0.137042	SETBP1	SET binding protein 1
11721181_a_at	-1.38537	8.01629	-9.51951	0.00214834	0.137042	VLDLR	very low density lipoprotein receptor
11739055_x_at	1.84237	8.4589	9.51913	0.00214859	0.137042	PTPN6	protein tyrosine phosphatase, non-receptor type 6
11730623_at	-1.34159	7.87351	-9.49949	0.00216202	0.1371	DSEL	dermatan sulfate epimerase-like
11727943_a_at	2.13005	7.81332	9.48834	0.00216969	0.1371	FPR3	formyl peptide receptor 3
11759907_at	-1.33498	9.04161	-9.48695	0.00217065	0.1371	ITGBL1	integrin, beta-like 1 (with EGF-like repeat domains)
11726337_a_at	2.1046	8.03578	9.48626	0.00217113	0.1371	ALOX5	arachidonate 5-lipoxygenase
11726948_at	1.55203	7.39182	9.48582	0.00217143	0.1371	TLR8	toll-like receptor 8
11727969_a_at	-2.02642	8.10871	-9.48206	0.00217403	0.1371	SLC14A1	solute carrier family 14 (urea transporter), member 1 (Kidd blood group)
11743685_a_at	-2.05006	9.54274	-9.4792	0.002176	0.1371	RABGAP1	RAB GTPase activating protein 1
11717091_s_at	-1.34256	9.72117	-9.47687	0.00217762	0.1371	CDKN1B	cyclin-dependent kinase inhibitor 1B (p27, Kip1)
11758340_x_at	1.55678	9.21019	9.47325	0.00218013	0.1371	HLA-DQA1 /// LOC100509457	major histocompatibility complex, class II, DQ alpha 1 /// HLA class II histocompatibility antigen, DQ alpha 1 chain-like
11739000_a_at	-1.36595	11.5531	-9.46995	0.00218242	0.1371	SLC38A2	solute carrier family 38, member 2
11739484_a_at	1.44753	7.44308	9.45733	0.00219122	0.1371	CCDC88A	coiled-coil domain containing 88A
11752325_a_at	-1.52764	7.83039	-9.45194	0.00219499	0.1371	NTRK3	neurotrophic tyrosine kinase, receptor, type 3
11738435_x_at	1.71401	10.5403	9.44776	0.00219791	0.1371	CD74	CD74 molecule, major histocompatibility complex, class II invariant chain
11728423_a_at	2.60856	8.00146	9.44649	0.00219881	0.1371	PILRA	paired immunoglobin-like type 2 receptor alpha
11728245_a_at	-1.70925	8.07062	-9.44587	0.00219924	0.1371	ANGPT2	angiopoietin 2
11717212_a_at	-1.55284	8.74002	-9.43703	0.00220546	0.1371	NEO1	neogenin 1
11722527_s_at	-1.49959	8.79781	-9.43399	0.0022076	0.1371	PTPN21	protein tyrosine phosphatase, non-receptor type 21
11736709_a_at	-1.81498	8.34368	-9.42839	0.00221156	0.1371	LIMCH1	LIM and calponin homology domains 1
11726486_a_at	-1.85869	8.76522	-9.42354	0.00221499	0.1371	CPED1	cadherin-like and PC-esterase domain containing 1
11717337_a_at	4.42274	9.68502	9.42016	0.00221739	0.1371	ITGB2	integrin, beta 2 (complement component 3 receptor 3 and 4 subunit)
11757269_s_at	1.43858	14.618	9.4109	0.00222397	0.1371	FTL	ferritin, light polypeptide
11757326_s_at	1.42812	14.6222	9.41031	0.00222439	0.1371	FTL	ferritin, light polypeptide
11731554_a_at	-5.25917	10.79	-9.40172	0.00223053	0.1371	SYNPO2	synaptopodin 2
11722242_at	-1.47014	8.30477	-9.39982	0.00223189	0.1371	TSPAN12	tetraspanin 12
11757404_x_at	-1.73159	10.7939	-9.39655	0.00223423	0.1371	ID3	inhibitor of DNA binding 3, dominant negative helix-loop-helix protein
11732501_a_at	-2.45717	8.54561	-9.39297	0.00223679	0.1371	TMOD1	tropomodulin 1
11745114_a_at	1.5076	7.315	9.39185	0.0022376	0.1371	EMR2	egf-like module containing, mucin-like, hormone receptor-like 2
11743561_a_at	2.34017	8.46466	9.39147	0.00223787	0.1371	PTPRC	protein tyrosine phosphatase, receptor type, C
11726869_a_at	1.60902	8.00652	9.39033	0.00223869	0.1371	MFSD12	major facilitator superfamily domain containing 12
11719825_a_at	-1.52381	8.09007	-9.38783	0.00224049	0.1371	ZAK	sterile alpha motif and leucine zipper containing kinase AZK
11754478_x_at	1.41124	10.1781	9.38482	0.00224266	0.1371	ATP6V0B	ATPase, H+ transporting, lysosomal 21kDa, V0 subunit b
11755646_a_at	1.70522	7.93044	9.38429	0.00224303	0.1371	SIGLEC1	sialic acid binding Ig-like lectin 1, sialoadhesin
11747454_a_at	-1.5109	9.97177	-9.38403	0.00224322	0.1371	ACTN4	actinin, alpha 4
11757905_x_at	-1.34074	8.32194	-9.37915	0.00224674	0.1371	KRT18	keratin 18
11744401_a_at	-1.62046	10.0225	-9.37898	0.00224686	0.1371	CAMTA1	calmodulin binding transcription activator 1
11756590_a_at	1.68639	6.96766	9.37573	0.00224921	0.1371	KMO	kynurenine 3-monooxygenase (kynurenine 3-hydroxylase)
11741144_x_at	-1.34273	12.0627	-9.36566	0.00225651	0.137251	CD151	CD151 molecule (Raph blood group)
11724650_a_at	-1.31964	7.81524	-9.36465	0.00225724	0.137251	MEIS2	Meis homeobox 2
11749191_a_at	-1.47951	8.18236	-9.35575	0.00226372	0.137403	ZAK	sterile alpha motif and leucine zipper containing kinase AZK
11722159_a_at	1.3337	8.8042	9.35359	0.0022653	0.137403	SLC7A8	solute carrier family 7 (amino acid transporter light chain, L system), member 8
11744152_a_at	-2.33989	9.88774	-9.34841	0.00226908	0.13743	FBLN1	fibulin 1
11715965_at	3.21567	8.37227	9.3398	0.00227539	0.13743	ST14	suppression of tumorigenicity 14 (colon carcinoma)
11749335_x_at	-1.7926	9.09753	-9.32924	0.00228316	0.13743	LIMS2	LIM and senescent cell antigen-like domains 2
11730815_x_at	3.1364	8.14508	9.32626	0.00228536	0.13743	LILRB4	leukocyte immunoglobulin-like receptor, subfamily B (with TM and ITIM domains), member 4
11740294_a_at	-2.00919	8.42584	-9.32123	0.00228908	0.13743	PRKG1	protein kinase, cGMP-dependent, type I
11757635_a_at	3.93519	10.8565	9.32075	0.00228943	0.13743	TYROBP	TYRO protein tyrosine kinase binding protein
11757988_s_at	-1.56161	7.74527	-9.319	0.00229073	0.13743	PRUNE2	prune homolog 2 (Drosophila)
11717345_a_at	-2.77398	9.48711	-9.31789	0.00229155	0.13743	FOSB	FBJ murine osteosarcoma viral oncogene homolog B
11715701_s_at	-2.93013	9.70964	-9.31568	0.00229319	0.13743	PFN2	profilin 2
11737750_s_at	1.39715	10.9966	9.31525	0.0022935	0.13743	SGK1	serum/glucocorticoid regulated kinase 1
11723686_s_at	-1.32818	9.60119	-9.31022	0.00229724	0.137487	FAM46A	family with sequence similarity 46, member A
11719667_s_at	1.37837	9.88338	9.30213	0.00230327	0.137681	STMN1	stathmin 1
11736574_a_at	1.44255	7.64829	9.2907	0.00231181	0.137721	FAM20A	family with sequence similarity 20, member A
11745421_a_at	1.41073	7.56154	9.2901	0.00231227	0.137721	BID	BH3 interacting domain death agonist
11732218_x_at	1.6141	8.07156	9.29007	0.00231228	0.137721	BID	BH3 interacting domain death agonist
11757845_s_at	-1.66328	9.2511	-9.27924	0.00232042	0.137865	ENDOD1	endonuclease domain containing 1
11719120_a_at	2.67395	7.74977	9.27856	0.00232094	0.137865	KYNU	kynureninase
11732444_a_at	-3.302	8.43362	-9.27069	0.00232687	0.137865	RBPMS	RNA binding protein with multiple splicing
11716918_a_at	1.30939	10.0316	9.27033	0.00232715	0.137865	NAGK	N-acetylglucosamine kinase
11756922_a_at	-1.37845	8.8849	-9.26839	0.00232862	0.137865	VASN	vasorin
11742746_a_at	2.66581	10.2312	9.2613	0.00233399	0.138018	LOC100509484 /// PLIN2	uncharacterized LOC100509484 /// perilipin 2
11720230_at	-2.30443	10.4702	-9.25367	0.00233979	0.138124	TES	testis derived transcript (3 LIM domains)
11751133_a_at	1.58733	9.43655	9.24938	0.00234306	0.138124	ATP6V1B2	ATPase, H+ transporting, lysosomal 56/58kDa, V1 subunit B2
11721630_at	2.71732	9.79624	9.24461	0.0023467	0.138124	MAFB	v-maf musculoaponeurotic fibrosarcoma oncogene homolog B (avian)
11724770_s_at	1.31623	8.78765	9.24428	0.00234696	0.138124	FCGR2A /// FCGR2C	Fc fragment of IgG, low affinity IIa, receptor (CD32) /// Fc fragment of IgG, low affinity IIc, receptor for (CD32) (gene/pseudogene)
11757849_s_at	-1.32292	7.9993	-9.21912	0.00236629	0.138954	PNMA2	paraneoplastic Ma antigen 2
11750778_a_at	2.79712	7.98324	9.21863	0.00236667	0.138954	MSR1	macrophage scavenger receptor 1
11746962_x_at	2.35873	8.41837	9.21229	0.00237158	0.138959	HLA-DMB	major histocompatibility complex, class II, DM beta
11720914_x_at	1.36229	8.31586	9.20827	0.0023747	0.138959	ACP2	acid phosphatase 2, lysosomal
11743829_a_at	-1.50351	10.2236	-9.20765	0.00237518	0.138959	PAM	peptidylglycine alpha-amidating monooxygenase
11727997_a_at	-1.60945	8.39015	-9.2034	0.00237849	0.138989	MYEF2	myelin expression factor 2
11721540_a_at	1.2915	6.90277	9.19609	0.00238419	0.139157	MAPK13	mitogen-activated protein kinase 13
11730961_a_at	-1.30322	7.86963	-9.19136	0.00238788	0.139209	TPM1	tropomyosin 1 (alpha)
11724876_x_at	-1.28904	8.64255	-9.18198	0.00239523	0.139473	AEBP2	AE binding protein 2
11751919_x_at	-1.45972	8.81826	-9.1687	0.00240569	0.139625	DIXDC1	DIX domain containing 1
11716949_s_at	-1.28769	10.0327	-9.16854	0.00240581	0.139625	TM9SF3	transmembrane 9 superfamily member 3
11722533_x_at	-3.34733	9.72575	-9.16454	0.00240898	0.139625	CALD1	caldesmon 1
11756073_x_at	1.80729	10.6613	9.16435	0.00240913	0.139625	HLA-DPB1	major histocompatibility complex, class II, DP beta 1
11719154_a_at	1.56843	7.92681	9.14492	0.00242457	0.140131	DRAM1	DNA-damage regulated autophagy modulator 1
11715931_s_at	1.53628	10.773	9.13997	0.00242852	0.140131	SGK1	serum/glucocorticoid regulated kinase 1
11731221_at	-1.3727	7.06168	-9.1384	0.00242978	0.140131	MICU3	mitochondrial calcium uptake family, member 3
11721712_at	-1.44313	7.7364	-9.13779	0.00243026	0.140131	LOC100996628 /// SHROOM3	uncharacterized LOC100996628 /// shroom family member 3
11758671_s_at	1.3818	7.90676	9.13031	0.00243627	0.140131	IKZF1	IKAROS family zinc finger 1 (Ikaros)
11756054_x_at	-1.54682	12.2241	-9.12662	0.00243923	0.140131	HSPB1	heat shock 27kDa protein 1
11756871_x_at	1.48807	6.99661	9.12495	0.00244057	0.140131	SNX10	sorting nexin 10
11720217_a_at	1.29574	8.54451	9.1248	0.00244069	0.140131	TMEM176A	transmembrane protein 176A
11730498_s_at	-1.49854	10.714	-9.12152	0.00244334	0.140131	MXI1	MAX interactor 1, dimerization protein
11720082_at	-1.28372	9.38625	-9.11678	0.00244716	0.140144	CBX6	chromobox homolog 6
11749674_a_at	1.53921	7.34277	9.1116	0.00245135	0.140144	KIAA1598	KIAA1598
11716196_x_at	-1.51913	10.2037	-9.11058	0.00245218	0.140144	ID1	inhibitor of DNA binding 1, dominant negative helix-loop-helix protein
11759343_x_at	1.33705	7.1483	9.1072	0.00245492	0.140144	FMN1	formin 1
11718077_s_at	1.45215	8.5495	9.10374	0.00245772	0.140144	MAPKAPK3	mitogen-activated protein kinase-activated protein kinase 3
11733978_a_at	1.32343	7.0996	9.0915	0.00246769	0.140551	CD28	CD28 molecule
11721230_a_at	-1.29534	7.1684	-9.08712	0.00247127	0.140593	BEND7	BEN domain containing 7
11739525_at	-1.95438	7.3674	-9.08321	0.00247447	0.140613	LPP	LIM domain containing preferred translocation partner in lipoma
11720539_at	1.36395	7.03516	9.0699	0.00248541	0.140766	FLVCR2	feline leukemia virus subgroup C cellular receptor family, member 2
11728944_a_at	2.06098	9.39772	9.06113	0.00249265	0.140766	LST1	leukocyte specific transcript 1
11746186_x_at	-1.8238	9.19135	-9.05935	0.00249413	0.140766	LTBP4	latent transforming growth factor beta binding protein 4
11717742_a_at	-1.50274	8.20256	-9.05829	0.00249501	0.140766	GPRC5C	G protein-coupled receptor, family C, group 5, member C
11754259_x_at	-1.3561	9.03926	-9.0572	0.00249591	0.140766	FDFT1	farnesyl-diphosphate farnesyltransferase 1
11733799_a_at	2.34156	8.72536	9.05682	0.00249623	0.140766	SLC31A2	solute carrier family 31 (copper transporters), member 2
11740375_a_at	1.45706	8.88803	9.05133	0.00250078	0.140766	RGS10	regulator of G-protein signaling 10
11756799_s_at	-1.27532	10.6005	-9.05028	0.00250165	0.140766	TOR1AIP1	torsin A interacting protein 1
11728405_s_at	1.53686	7.72438	9.04387	0.002507	0.140766	LRRC33	leucine rich repeat containing 33
11715369_s_at	-1.29647	12.1306	-9.04147	0.002509	0.140766	NDUFA4	NADH dehydrogenase (ubiquinone) 1 alpha subcomplex, 4, 9kDa
11722862_x_at	-1.2788	7.31823	-9.03814	0.00251178	0.140766	TRIM2	tripartite motif containing 2
11727505_at	-1.27541	9.51122	-9.03247	0.00251652	0.140766	RAB21	RAB21, member RAS oncogene family
11728265_a_at	1.57968	7.0289	9.03163	0.00251722	0.140766	LILRB2	leukocyte immunoglobulin-like receptor, subfamily B (with TM and ITIM domains), member 2
11717884_a_at	-1.64468	7.73596	-9.02815	0.00252014	0.140766	ZHX3	zinc fingers and homeoboxes 3
11724683_a_at	2.82142	8.97007	9.02761	0.0025206	0.140766	CD300A	CD300a molecule
11717581_s_at	4.62188	9.68808	9.02515	0.00252267	0.140766	CD52	CD52 molecule
11725597_a_at	1.98954	7.00392	9.01619	0.00253022	0.140807	SULT1C2	sulfotransferase family, cytosolic, 1C, member 2
11717909_at	-1.62703	10.0345	-9.01314	0.00253279	0.140807	IGFBP6	insulin-like growth factor binding protein 6
11743680_x_at	-1.27787	7.45812	-9.00865	0.00253659	0.140807	PTCH1	patched 1
11721002_s_at	-1.5307	9.08184	-9.0054	0.00253934	0.140807	HEXIM1	hexamethylene bis-acetamide inducible 1
11757981_s_at	-1.30379	8.01124	-9.00488	0.00253978	0.140807	WASF3	WAS protein family, member 3
11756026_x_at	1.47825	10.4495	9.00407	0.00254047	0.140807	DBI	diazepam binding inhibitor (GABA receptor modulator, acyl-CoA binding protein)
11721031_a_at	-1.93633	8.43579	-8.98981	0.0025526	0.141276	SH3BGR	SH3 domain binding glutamic acid-rich protein
11739567_s_at	-1.29416	9.6622	-8.98742	0.00255465	0.141276	FKBP5	FK506 binding protein 5
11723163_s_at	-1.43427	7.61477	-8.98009	0.00256093	0.141286	NR3C2	nuclear receptor subfamily 3, group C, member 2
11755895_a_at	-1.26923	8.58775	-8.97804	0.00256268	0.141286	FAM129A	family with sequence similarity 129, member A
11718539_a_at	-2.73899	8.98332	-8.97721	0.0025634	0.141286	NRN1	neuritin 1
11722756_at	1.54715	7.86154	8.97389	0.00256625	0.141286	TMEM37	transmembrane protein 37
11752744_a_at	2.43384	10.5734	8.9652	0.00257373	0.141287	LGMN	legumain
11745560_a_at	1.5749	7.62667	8.96326	0.00257541	0.141287	DOCK8	dedicator of cytokinesis 8
11757928_s_at	-1.40137	7.31584	-8.96139	0.00257702	0.141287	TMEM178A	transmembrane protein 178A
11734226_a_at	-1.58042	8.00459	-8.96064	0.00257767	0.141287	LIMCH1	LIM and calponin homology domains 1
11742933_a_at	-1.55066	8.88105	-8.94903	0.00258773	0.141534	PSIP1	PC4 and SFRS1 interacting protein 1
11735867_a_at	-2.09126	7.9845	-8.94217	0.00259371	0.141534	C5orf46	chromosome 5 open reading frame 46
11746162_a_at	1.73226	8.84194	8.94201	0.00259384	0.141534	FAM49B	family with sequence similarity 49, member B
11758225_s_at	2.59979	7.96186	8.93938	0.00259614	0.141534	IQGAP2	IQ motif containing GTPase activating protein 2
11732445_a_at	-3.30318	9.06592	-8.93465	0.00260027	0.141534	RBPMS	RNA binding protein with multiple splicing
11716708_a_at	-1.25659	7.96552	-8.93308	0.00260165	0.141534	DDR1 /// MIR4640	discoidin domain receptor tyrosine kinase 1 /// microRNA 4640
11742820_s_at	-2.69831	8.9024	-8.93244	0.00260221	0.141534	OGN	osteoglycin
11720579_a_at	-3.57687	9.86173	-8.92648	0.00260743	0.141601	PDE5A	phosphodiesterase 5A, cGMP-specific
11721061_a_at	1.81346	7.09779	8.92363	0.00260994	0.141601	IQGAP2	IQ motif containing GTPase activating protein 2
11756363_a_at	1.70044	8.43562	8.91794	0.00261494	0.141601	NCKAP1L	NCK-associated protein 1-like
11716377_s_at	2.53055	11.1025	8.91556	0.00261705	0.141601	GRN	granulin
11720079_at	-1.82186	7.83473	-8.91477	0.00261774	0.141601	NTRK2	neurotrophic tyrosine kinase, receptor, type 2
11758070_s_at	-2.32197	9.08304	-8.90491	0.00262646	0.141918	PBX1	pre-B-cell leukemia homeobox 1
11724304_a_at	-1.33347	8.63006	-8.89483	0.00263542	0.142246	TEF	thyrotrophic embryonic factor
11716842_a_at	3.25304	8.94613	8.88902	0.0026406	0.142371	CD53	CD53 molecule
11726870_at	-2.06676	8.27685	-8.88492	0.00264426	0.142413	SETBP1	SET binding protein 1
11718058_a_at	1.59132	7.80773	8.8797	0.00264893	0.14251	TYMS	thymidylate synthetase
11724237_a_at	1.25224	7.72732	8.86085	0.0026659	0.142941	LAT2	linker for activation of T cells family, member 2
11734829_a_at	-1.50983	8.18126	-8.85321	0.00267281	0.142941	PRG4	proteoglycan 4
11717220_at	-2.3892	9.52293	-8.8514	0.00267446	0.142941	NFIB	nuclear factor I/B
11749293_x_at	2.26023	9.22657	8.84694	0.00267851	0.142941	MS4A6A	membrane-spanning 4-domains, subfamily A, member 6A
11743661_a_at	-1.49538	8.70404	-8.84471	0.00268054	0.142941	MBNL1	muscleblind-like splicing regulator 1
11731541_at	-1.29604	8.27031	-8.83986	0.00268496	0.142941	SESTD1	SEC14 and spectrin domains 1
11719147_at	-1.24077	8.29435	-8.83592	0.00268855	0.142941	FAM117A	family with sequence similarity 117, member A
11749726_x_at	-2.75508	10.3677	-8.8335	0.00269077	0.142941	NR4A1	nuclear receptor subfamily 4, group A, member 1
11715555_a_at	-1.55805	11.1286	-8.83181	0.00269232	0.142941	CYB5R3	cytochrome b5 reductase 3
11757633_x_at	1.24232	14.2009	8.82288	0.00270051	0.142941	FTH1	ferritin, heavy polypeptide 1
11716130_a_at	-1.27693	6.86985	-8.8202	0.00270297	0.142941	FSTL3	follistatin-like 3 (secreted glycoprotein)
11719499_at	-2.5177	8.97786	-8.81835	0.00270467	0.142941	MAOB	monoamine oxidase B
11739450_x_at	-1.33218	10.3844	-8.81339	0.00270925	0.142941	ROCK1	Rho-associated, coiled-coil containing protein kinase 1
11743732_a_at	-1.29835	9.3168	-8.81203	0.0027105	0.142941	RCAN1	regulator of calcineurin 1
11723156_a_at	2.59359	9.36498	8.80821	0.00271404	0.142941	LSP1	lymphocyte-specific protein 1
11758189_s_at	-1.24677	11.8607	-8.80788	0.00271434	0.142941	ITGB1	integrin, beta 1 (fibronectin receptor, beta polypeptide, antigen CD29 includes MDF2, MSK12)
11756924_s_at	1.52961	10.1866	8.80666	0.00271547	0.142941	ATP6V1A	ATPase, H+ transporting, lysosomal 70kDa, V1 subunit A
11740278_s_at	-1.96342	11.6707	-8.80421	0.00271774	0.142941	PAM	peptidylglycine alpha-amidating monooxygenase
11716534_s_at	1.28543	10.2916	8.80268	0.00271916	0.142941	PPT1	palmitoyl-protein thioesterase 1
11744077_at	1.43966	11.3185	8.80243	0.00271939	0.142941	ARPC1B	actin related protein 2/3 complex, subunit 1B, 41kDa
11728873_s_at	-1.25384	7.39451	-8.80225	0.00271956	0.142941	RBM24	RNA binding motif protein 24
11719045_a_at	-1.57919	8.79945	-8.80052	0.00272117	0.142941	PER3	period circadian clock 3
11726727_a_at	1.44505	7.91973	8.79813	0.00272339	0.142941	NABP1	nucleic acid binding protein 1
11727254_a_at	1.60741	8.8025	8.79449	0.00272677	0.142941	TMEM51	transmembrane protein 51
11721188_a_at	-1.80431	8.09584	-8.79141	0.00272964	0.142941	ARHGEF9	Cdc42 guanine nucleotide exchange factor (GEF) 9
11724559_at	1.3805	8.21295	8.78809	0.00273274	0.142941	GNA15	guanine nucleotide binding protein (G protein), alpha 15 (Gq class)
11725007_at	-2.6207	9.08612	-8.78576	0.00273492	0.142941	DACT3	dishevelled-binding antagonist of beta-catenin 3
11734808_s_at	-1.47329	9.2914	-8.76046	0.0027587	0.143613	DTNA	dystrobrevin, alpha
11732736_at	-1.39751	7.8378	-8.75744	0.00276156	0.143613	CHSY3	chondroitin sulfate synthase 3
11737388_s_at	-1.40721	8.17385	-8.75597	0.00276295	0.143613	MTMR11	myotubularin related protein 11
11715941_s_at	-1.89476	9.55197	-8.75587	0.00276304	0.143613	AQP1	aquaporin 1 (Colton blood group)
11741191_a_at	1.39143	10.7952	8.74729	0.00277118	0.143613	BCAP31	B-cell receptor-associated protein 31
11728266_a_at	1.80026	7.80969	8.74472	0.00277363	0.143613	LILRB2	leukocyte immunoglobulin-like receptor, subfamily B (with TM and ITIM domains), member 2
11717922_a_at	-1.63356	7.53266	-8.74336	0.00277493	0.143613	YAP1	Yes-associated protein 1
11722853_a_at	-1.43782	8.9644	-8.73921	0.00277888	0.143613	HABP4	hyaluronan binding protein 4
11747675_a_at	-1.26502	8.21401	-8.73826	0.00277979	0.143613	SUN1	Sad1 and UNC84 domain containing 1
11746287_x_at	2.34856	11.0095	8.73809	0.00277995	0.143613	LGMN	legumain
11741519_s_at	3.00084	10.5658	8.7375	0.00278052	0.143613	CD14	CD14 molecule
11729847_a_at	1.52266	7.56199	8.73531	0.00278261	0.143613	CCL7	chemokine (C-C motif) ligand 7
11755818_a_at	-2.32768	9.38684	-8.73001	0.00278768	0.143628	FYCO1	FYVE and coiled-coil domain containing 1
11727445_a_at	1.48943	6.53799	8.72362	0.00279382	0.143628	TMEM255A	transmembrane protein 255A
11755417_a_at	-1.72608	8.13334	-8.72187	0.0027955	0.143628	KIAA0922	KIAA0922
11739526_a_at	-3.00522	10.5108	-8.72058	0.00279674	0.143628	LPP	LIM domain containing preferred translocation partner in lipoma
11749589_x_at	3.83677	9.87339	8.71767	0.00279954	0.143628	CTSS	cathepsin S
11759566_a_at	2.40723	7.53589	8.71688	0.00280031	0.143628	NPL	N-acetylneuraminate pyruvate lyase (dihydrodipicolinate synthase)
11753564_x_at	-3.45207	9.70675	-8.71059	0.00280637	0.14379	PPP1R14A	protein phosphatase 1, regulatory (inhibitor) subunit 14A
11727685_at	-1.59395	8.27512	-8.68592	0.00283036	0.144869	NTRK3	neurotrophic tyrosine kinase, receptor, type 3
11758233_s_at	1.30003	6.96523	8.67631	0.00283978	0.145195	VNN1	vanin 1
11754980_a_at	-1.33361	8.18546	-8.67154	0.00284446	0.145195	SMARCD3	SWI/SNF related, matrix associated, actin dependent regulator of chromatin, subfamily d, member 3
11728241_at	1.22034	9.14487	8.66517	0.00285074	0.145195	RRAGD	Ras-related GTP binding D
11716481_x_at	1.26908	7.99616	8.66389	0.00285201	0.145195	SPINT1	serine peptidase inhibitor, Kunitz type 1
11722803_s_at	-1.21931	7.74771	-8.66228	0.0028536	0.145195	GNAI1	guanine nucleotide binding protein (G protein), alpha inhibiting activity polypeptide 1
11759141_at	-1.70112	9.07534	-8.65888	0.00285696	0.145195	HIP1	huntingtin interacting protein 1
11745245_a_at	-1.30086	9.23453	-8.65859	0.00285725	0.145195	ITGBL1	integrin, beta-like 1 (with EGF-like repeat domains)
11718180_s_at	-2.40275	8.86182	-8.65463	0.00286117	0.145245	FERMT2	fermitin family member 2
11715829_at	-2.65445	10.866	-8.64589	0.00286986	0.145537	PLS3	plastin 3
11737299_at	1.88427	8.52281	8.62962	0.00288612	0.145899	RAB42	RAB42, member RAS oncogene family
11758284_s_at	-1.53147	8.55366	-8.62885	0.00288689	0.145899	KCTD9	potassium channel tetramerisation domain containing 9
11747250_a_at	-1.37349	8.167	-8.62325	0.00289251	0.145899	GRK5	G protein-coupled receptor kinase 5
11716015_a_at	1.62066	9.39262	8.62319	0.00289257	0.145899	CMTM3	CKLF-like MARVEL transmembrane domain containing 3
11733695_a_at	1.26364	7.0113	8.6183	0.0028975	0.145899	UBE2C	ubiquitin-conjugating enzyme E2C
11720653_a_at	-1.27136	8.81145	-8.61632	0.0028995	0.145899	BBX	bobby sox homolog (Drosophila)
11715467_s_at	1.43817	11.2739	8.61401	0.00290183	0.145899	ARHGDIB	Rho GDP dissociation inhibitor (GDI) beta
11718984_a_at	-1.32437	8.70785	-8.61334	0.0029025	0.145899	KLHL21	kelch-like family member 21
11726558_a_at	-1.20953	10.6717	-8.61231	0.00290355	0.145899	PPP2CB	protein phosphatase 2, catalytic subunit, beta isozyme
11734675_at	-2.00929	8.39284	-8.60859	0.00290731	0.14594	ITIH5	inter-alpha-trypsin inhibitor heavy chain family, member 5
11728507_at	1.77625	9.28133	8.60346	0.00291251	0.146053	LY96	lymphocyte antigen 96
11722929_a_at	-1.30295	7.95314	-8.59875	0.00291729	0.146075	CNKSR3	CNKSR family member 3
11723516_a_at	-1.79899	8.29967	-8.59723	0.00291885	0.146075	CAB39L	calcium binding protein 39-like
11753527_a_at	-1.35531	7.84519	-8.59244	0.00292373	0.146088	RAB23	RAB23, member RAS oncogene family
11721052_at	-1.35192	7.6669	-8.59119	0.002925	0.146088	KLHL42	kelch-like family member 42
11721111_a_at	1.24031	8.47905	8.5829	0.00293349	0.146276	ACOT13	acyl-CoA thioesterase 13
11733825_s_at	-2.25576	10.6335	-8.5799	0.00293656	0.146276	C1orf198	chromosome 1 open reading frame 198
11758737_s_at	-1.47465	8.6827	-8.57641	0.00294014	0.146276	PGRMC2	progesterone receptor membrane component 2
11751342_a_at	-1.21773	9.98705	-8.57402	0.0029426	0.146276	NDRG1	N-myc downstream regulated 1
11763492_a_at	-2.26644	8.29615	-8.57142	0.00294528	0.146276	NRN1	neuritin 1
11753599_x_at	-3.90984	10.5932	-8.56911	0.00294766	0.146276	FHL1	four and a half LIM domains 1
11754427_a_at	-1.28319	8.76202	-8.56659	0.00295026	0.146276	CCSER2	coiled-coil serine-rich protein 2
11715584_a_at	-2.25723	11.0388	-8.55811	0.00295903	0.146276	CAV1	caveolin 1, caveolae protein, 22kDa
11745715_a_at	-2.25723	11.0388	-8.55811	0.00295903	0.146276	CAV1	caveolin 1, caveolae protein, 22kDa
11715524_a_at	1.47621	9.81449	8.55761	0.00295955	0.146276	COTL1	coactosin-like 1 (Dictyostelium)
11730032_at	-1.4391	7.18361	-8.55595	0.00296127	0.146276	MKX	mohawk homeobox
11747793_a_at	-1.8262	8.85124	-8.54884	0.00296865	0.146494	PTK2	protein tyrosine kinase 2
11715865_a_at	1.63217	10.3886	8.5396	0.00297829	0.146823	ATP6V1F	ATPase, H+ transporting, lysosomal 14kDa, V1 subunit F
11735111_a_at	-1.62924	8.2678	-8.53678	0.00298125	0.146823	PTGER3	prostaglandin E receptor 3 (subtype EP3)
11722223_a_at	-1.39085	7.44521	-8.51936	0.00299955	0.147422	NPR1	natriuretic peptide receptor A/guanylate cyclase A (atrionatriuretic peptide receptor A)
11715986_s_at	-1.27262	10.0045	-8.51524	0.0030039	0.147422	YPEL5	yippee-like 5 (Drosophila)
11732217_a_at	1.31647	8.12966	8.51289	0.00300639	0.147422	BID	BH3 interacting domain death agonist
11717143_at	-1.22091	8.15621	-8.51262	0.00300668	0.147422	LANCL1	LanC lantibiotic synthetase component C-like 1 (bacterial)
11717102_a_at	-1.90768	7.36853	-8.50705	0.00301258	0.147422	SLC38A1	solute carrier family 38, member 1
11715710_s_at	1.46071	9.25888	8.50547	0.00301425	0.147422	CTSC	cathepsin C
11716743_s_at	-1.99595	8.59919	-8.50546	0.00301427	0.147422	TJP2	tight junction protein 2
11716128_at	1.23052	9.78983	8.49937	0.00302074	0.147593	IGF2R	insulin-like growth factor 2 receptor
11717452_x_at	-1.29083	10.3278	-8.49163	0.003029	0.147739	NEK7	NIMA-related kinase 7
11736526_a_at	1.27614	7.31138	8.49097	0.0030297	0.147739	CARD9	caspase recruitment domain family, member 9
11758252_s_at	1.42473	8.96783	8.48611	0.0030349	0.147773	HSD3B7	hydroxy-delta-5-steroid dehydrogenase, 3 beta- and steroid delta-isomerase 7
11727740_a_at	1.20178	6.96139	8.48474	0.00303638	0.147773	CD300LF	CD300 molecule-like family member f
11733768_x_at	1.19249	7.11778	8.47048	0.00305171	0.148272	LILRA2	leukocyte immunoglobulin-like receptor, subfamily A (with TM domain), member 2
11739539_a_at	-1.20229	8.7053	-8.46876	0.00305357	0.148272	PIK3R1	phosphoinositide-3-kinase, regulatory subunit 1 (alpha)
11724979_a_at	1.56509	7.27571	8.46576	0.00305681	0.148272	DPEP2	dipeptidase 2
11750685_a_at	1.18804	7.01709	8.46225	0.00306061	0.148272	GALNT6	UDP-N-acetyl-alpha-D-galactosamine:polypeptide N-acetylgalactosaminyltransferase 6 (GalNAc-T6)
11724068_at	-1.19165	7.58318	-8.4607	0.00306228	0.148272	PELI2	pellino E3 ubiquitin protein ligase family member 2
11715857_a_at	-2.1231	9.23465	-8.45653	0.00306681	0.148272	NCKAP1	NCK-associated protein 1
11715620_a_at	-3.86649	10.9645	-8.45156	0.00307222	0.148272	CRYAB	crystallin, alpha B
11719198_s_at	-1.87731	10.7317	-8.45021	0.00307369	0.148272	CCND2	cyclin D2
11719247_at	1.64342	8.24846	8.44779	0.00307633	0.148272	AIM1	absent in melanoma 1
11754640_a_at	-1.2372	7.45374	-8.44756	0.00307657	0.148272	EPHX2	epoxide hydrolase 2, cytoplasmic
11728503_at	1.23383	7.50554	8.44177	0.0030829	0.148432	CD300C	CD300c molecule
11719113_a_at	-1.19516	9.86698	-8.42683	0.0030993	0.149077	PJA2	praja ring finger 2, E3 ubiquitin protein ligase
11754171_a_at	1.75751	7.80233	8.42182	0.00310482	0.149197	TMEM37	transmembrane protein 37
11745841_a_at	1.64425	8.25298	8.41729	0.00310983	0.149291	CNDP2	CNDP dipeptidase 2 (metallopeptidase M20 family)
11746124_x_at	-2.10273	8.52766	-8.41223	0.00311544	0.149291	MAP3K7CL	MAP3K7 C-terminal like
11718927_a_at	-2.21925	10.6926	-8.40968	0.00311827	0.149291	ARID5B	AT rich interactive domain 5B (MRF1-like)
11743434_a_at	1.3026	7.77392	8.40709	0.00312114	0.149291	CHST11	carbohydrate (chondroitin 4) sulfotransferase 11
11744282_at	2.82075	9.04658	8.40637	0.00312194	0.149291	PLBD1	phospholipase B domain containing 1
11760107_a_at	-1.7882	8.47179	-8.40175	0.00312709	0.149291	PHF10	PHD finger protein 10
11716615_s_at	-1.19358	10.6023	-8.40033	0.00312867	0.149291	REEP5	receptor accessory protein 5
11744049_at	-3.09779	8.98609	-8.39833	0.0031309	0.149291	MAP1B	microtubule-associated protein 1B
11721247_a_at	-1.4131	9.23182	-8.395	0.00313461	0.149324	MRGPRF	MAS-related GPR, member F
11725131_x_at	-1.61617	10.0245	-8.39159	0.00313843	0.14936	TCEAL3	transcription elongation factor A (SII)-like 3
11724005_s_at	2.16768	8.10612	8.38894	0.00314141	0.14936	FYB	FYN binding protein
11716162_at	-2.12479	9.27278	-8.38459	0.00314628	0.149363	LBH	limb bud and heart development
11759342_at	1.19247	6.75139	8.38104	0.00315028	0.149363	FMN1	formin 1
11725016_at	-1.74516	7.78356	-8.38051	0.00315087	0.149363	MAP9	microtubule-associated protein 9
11727499_s_at	-1.17744	7.99004	-8.37815	0.00315353	0.149363	ZRANB1	zinc finger, RAN-binding domain containing 1
11749774_x_at	-2	8.5382	-8.37152	0.00316101	0.149574	MAP3K7CL	MAP3K7 C-terminal like
11721957_at	-1.19232	9.6531	-8.35908	0.00317511	0.149894	YPEL2	yippee-like 2 (Drosophila)
11723918_s_at	-1.28447	11.2254	-8.35722	0.00317723	0.149894	CCNI	cyclin I
11750359_x_at	2.2195	8.40012	8.35113	0.00318416	0.149894	CD68 /// SNORA67	CD68 molecule /// small nucleolar RNA, H/ACA box 67
11747262_s_at	-1.20614	6.99536	-8.34663	0.00318931	0.149894	RRAS2	related RAS viral (r-ras) oncogene homolog 2
11751157_a_at	-1.3094	8.36551	-8.34323	0.00319319	0.149894	SMTN	smoothelin
11719536_at	-2.23725	9.71222	-8.34297	0.0031935	0.149894	CPXM2	carboxypeptidase X (M14 family), member 2
11741047_a_at	1.57535	7.81002	8.34186	0.00319477	0.149894	VAV1	vav 1 guanine nucleotide exchange factor
11717015_a_at	1.29385	7.55278	8.34142	0.00319526	0.149894	CLDN7	claudin 7
11722526_at	-1.67117	7.64252	-8.33859	0.00319851	0.149894	PTPN21	protein tyrosine phosphatase, non-receptor type 21
11729364_at	-1.73415	7.29594	-8.33625	0.0032012	0.149894	PRKAA2	protein kinase, AMP-activated, alpha 2 catalytic subunit
11754657_a_at	-1.61622	8.32776	-8.33462	0.00320308	0.149894	JPH2	junctophilin 2
11724414_a_at	-1.45155	7.15054	-8.32634	0.00321261	0.149894	ZNF711	zinc finger protein 711
11734690_a_at	1.18941	8.24316	8.32619	0.00321279	0.149894	CYTIP	cytohesin 1 interacting protein
11716718_at	1.22518	7.65648	8.32588	0.00321315	0.149894	GLA	galactosidase, alpha
11728893_at	-1.17967	7.84525	-8.32222	0.00321738	0.149894	TPPP	tubulin polymerization promoting protein
11739746_s_at	-2.19523	9.58347	-8.31887	0.00322126	0.149894	SVIL	supervillin
11746911_s_at	-1.40557	9.41983	-8.31789	0.00322239	0.149894	CALCOCO2	calcium binding and coiled-coil domain 2
11730382_a_at	-1.49508	8.46042	-8.31195	0.00322929	0.149894	SNX18	sorting nexin 18
11717451_at	-1.24945	10.1524	-8.31168	0.0032296	0.149894	NEK7	NIMA-related kinase 7
11716041_a_at	-1.22481	10.4675	-8.30989	0.00323168	0.149894	PPP2CB	protein phosphatase 2, catalytic subunit, beta isozyme
11728424_x_at	2.51656	8.07329	8.30685	0.00323522	0.149894	PILRA	paired immunoglobin-like type 2 receptor alpha
11716828_a_at	2.10996	11.9363	8.30675	0.00323533	0.149894	NPC2	Niemann-Pick disease, type C2
11758821_x_at	1.24633	8.52857	8.30288	0.00323985	0.149894	HLA-DQB1 /// HLA-DRB1 /// LOC100507709 /// LOC100507714 /// LOC101060835	major histocompatibility complex, class II, DQ beta 1 /// major histocompatibility complex, class II, DR beta 1 /// HLA class II histocompatibility antigen, DRB1-7 beta chain-like /// HLA class II histocompatibility antigen, DRB1-7 beta chain-like /// HLA class II histocompatibility antigen, DQ beta 1 chain-like
11718577_s_at	-3.09473	10.447	-8.30237	0.00324045	0.149894	NET1	neuroepithelial cell transforming 1
11749498_a_at	-1.29198	8.94313	-8.29239	0.00325213	0.149986	NFIB	nuclear factor I/B
11722087_a_at	-1.29704	8.10864	-8.28991	0.00325503	0.149986	NR1D2	nuclear receptor subfamily 1, group D, member 2
11753321_a_at	1.41972	8.39605	8.28897	0.00325614	0.149986	TNFSF12 /// TNFSF12-TNFSF13 /// TNFSF13	tumor necrosis factor (ligand) superfamily, member 12 /// TNFSF12-TNFSF13 readthrough /// tumor necrosis factor (ligand) superfamily, member 13
11755141_a_at	1.43412	7.41475	8.28816	0.00325709	0.149986	CACNA2D4	calcium channel, voltage-dependent, alpha 2/delta subunit 4
11744481_s_at	1.79181	8.73975	8.28032	0.00326632	0.149986	OPN3	opsin 3
11756367_x_at	-2.69949	9.18805	-8.27917	0.00326769	0.149986	SLC25A4	solute carrier family 25 (mitochondrial carrier; adenine nucleotide translocator), member 4
11741793_a_at	1.21581	8.32406	8.27878	0.00326815	0.149986	FUOM	fucose mutarotase
11722088_s_at	-1.79575	8.33173	-8.2777	0.00326941	0.149986	NR1D2	nuclear receptor subfamily 1, group D, member 2
11739159_at	-1.17108	9.37521	-8.27744	0.00326972	0.149986	FAM8A1	family with sequence similarity 8, member A1
11744914_s_at	-1.23964	10.5162	-8.27388	0.00327393	0.150038	EID1	EP300 interacting inhibitor of differentiation 1
11748758_a_at	2.57578	8.1453	8.26567	0.00328367	0.150038	SLC2A5	solute carrier family 2 (facilitated glucose/fructose transporter), member 5
11757346_s_at	1.41045	14.5955	8.26468	0.00328485	0.150038	FTL	ferritin, light polypeptide
11725259_s_at	-1.3022	8.96493	-8.26415	0.00328547	0.150038	PPM1B	protein phosphatase, Mg2+/Mn2+ dependent, 1B
11722861_s_at	-1.4313	7.67198	-8.2637	0.00328602	0.150038	TRIM2	tripartite motif containing 2
11717971_s_at	-1.31532	8.97565	-8.25904	0.00329156	0.150153	FAM20B	family with sequence similarity 20, member B
11726977_s_at	-1.42107	11.7159	-8.25517	0.00329617	0.150225	EIF4A2 /// MIR1248 /// SNORA4 /// SNORA63 /// SNORA81 /// SNORD2	eukaryotic translation initiation factor 4A2 /// microRNA 1248 /// small nucleolar RNA, H/ACA box 4 /// small nucleolar RNA, H/ACA box 63 /// small nucleolar RNA, H/ACA box 81 /// small nucleolar RNA, C/D box 2
11764052_s_at	-1.4593	7.91299	-8.25041	0.00330186	0.150296	MARC2	mitochondrial amidoxime reducing component 2
11715119_s_at	-1.36359	7.57377	-8.24878	0.00330381	0.150296	C2CD4B	C2 calcium-dependent domain containing 4B
11743645_s_at	-2.40451	9.04059	-8.24438	0.00330909	0.150311	MXRA7	matrix-remodelling associated 7
11745322_x_at	-1.25834	8.87063	-8.23934	0.00331515	0.150311	FDFT1	farnesyl-diphosphate farnesyltransferase 1
11751707_a_at	-1.26357	7.30606	-8.23917	0.00331535	0.150311	TASP1	taspase, threonine aspartase, 1
11725133_s_at	-1.15637	9.53849	-8.23752	0.00331734	0.150311	GCOM1 /// POLR2M	GRINL1A complex locus 1 /// polymerase (RNA) II (DNA directed) polypeptide M
11732433_s_at	1.32206	7.98723	8.2345	0.00332097	0.150311	GK	glycerol kinase
11726614_at	-1.25938	8.75633	-8.23067	0.0033256	0.150311	CDH2	cadherin 2, type 1, N-cadherin (neuronal)
11735189_s_at	1.48555	11.0345	8.22932	0.00332723	0.150311	H2AFY	H2A histone family, member Y
11739280_a_at	2.48394	8.91478	8.22832	0.00332844	0.150311	CXCL16	chemokine (C-X-C motif) ligand 16
11742697_a_at	-1.7499	8.94154	-8.22444	0.00333313	0.15037	ITM2A	integral membrane protein 2A
11741520_x_at	3.00722	10.0198	8.22223	0.00333581	0.15037	CD14	CD14 molecule
11728945_x_at	1.47138	8.96732	8.21531	0.00334423	0.150502	LST1	leukocyte specific transcript 1
11715462_x_at	3.73405	11.7117	8.21482	0.00334481	0.150502	LYZ	lysozyme
11731569_at	-2.50166	8.14189	-8.2112	0.00334923	0.150563	PAWR	PRKC, apoptosis, WT1, regulator
11748110_a_at	2.42874	10.5597	8.20643	0.00335506	0.150589	LGMN	legumain
11723287_at	3.57431	10.895	8.20376	0.00335831	0.150589	TYROBP	TYRO protein tyrosine kinase binding protein
11719134_s_at	1.15122	8.46395	8.20088	0.00336184	0.150589	COMMD9	COMM domain containing 9
11754973_x_at	-1.69675	7.62663	-8.20078	0.00336197	0.150589	MANSC1	MANSC domain containing 1
11745726_x_at	2.51958	10.2562	8.19193	0.00337283	0.150896	GRN	granulin
11724014_a_at	1.71183	8.93282	8.18635	0.00337971	0.150896	SOAT1	sterol O-acyltransferase 1
11719531_a_at	2.03523	9.46665	8.18602	0.00338011	0.150896	MMP19	matrix metallopeptidase 19
11717144_s_at	-1.22707	9.50843	-8.18528	0.00338103	0.150896	LANCL1	LanC lantibiotic synthetase component C-like 1 (bacterial)
11718013_at	-1.17383	8.41811	-8.18106	0.00338625	0.150971	IRS2	insulin receptor substrate 2
11721751_s_at	-1.63127	7.92855	-8.17739	0.00339079	0.150971	FZD7	frizzled family receptor 7
11739452_a_at	1.54696	9.37435	8.17358	0.00339551	0.150971	ME2	malic enzyme 2, NAD(+)-dependent, mitochondrial
11735385_s_at	-1.88915	8.57538	-8.17327	0.0033959	0.150971	DACT1	dishevelled-binding antagonist of beta-catenin 1
11716533_a_at	1.26155	10.2523	8.17161	0.00339796	0.150971	PPT1	palmitoyl-protein thioesterase 1
11748399_s_at	-1.23715	8.02585	-8.15728	0.00341582	0.151402	VCL	vinculin
11733373_at	-1.63924	8.52529	-8.15655	0.00341674	0.151402	JAK2	Janus kinase 2
11723803_a_at	3.78138	8.68357	8.15648	0.00341682	0.151402	TREM2	triggering receptor expressed on myeloid cells 2
11722605_at	-1.16252	8.33736	-8.14838	0.00342699	0.151716	CDC37L1	cell division cycle 37-like 1
11750957_s_at	-1.17118	7.34947	-8.14382	0.00343273	0.151764	NOX4	NADPH oxidase 4
11733646_x_at	1.18043	6.93017	8.14125	0.00343596	0.151764	KYNU	kynureninase
11752940_a_at	-2.95003	10.6121	-8.13861	0.00343929	0.151764	EGR1	early growth response 1
11720747_a_at	1.39986	8.48225	8.13774	0.00344038	0.151764	ADCY7	adenylate cyclase 7
11759288_at	-1.14656	9.96177	-8.13382	0.00344534	0.151764	TMX4	thioredoxin-related transmembrane protein 4
11758913_at	-1.14228	8.28941	-8.13293	0.00344647	0.151764	PCSK5	proprotein convertase subtilisin/kexin type 5
11717168_a_at	-2.05374	8.52417	-8.1295	0.00345082	0.151821	PER1	period circadian clock 1
11716073_a_at	1.62458	9.50787	8.12539	0.00345603	0.151915	ATP6V1B2	ATPase, H+ transporting, lysosomal 56/58kDa, V1 subunit B2
11720515_s_at	-1.17204	7.28545	-8.12178	0.00346062	0.151982	LURAP1L	leucine rich adaptor protein 1-like
11724001_a_at	-1.14756	7.55624	-8.11925	0.00346385	0.151988	LNP1	leukemia NUP98 fusion partner 1
11719737_a_at	1.37727	7.46242	8.11665	0.00346716	0.151999	FAM134B	family with sequence similarity 134, member B
11719194_a_at	1.70543	8.07444	8.10569	0.00348117	0.152478	DFNA5	deafness, autosomal dominant 5
11729662_x_at	1.14852	9.02005	8.10165	0.00348636	0.152571	GLB1	galactosidase, beta 1
11753001_a_at	1.21072	7.40733	8.09462	0.00349542	0.152832	PPARG	peroxisome proliferator-activated receptor gamma
11741193_a_at	1.66544	8.32297	8.0859	0.00350668	0.153084	ACP2	acid phosphatase 2, lysosomal
11734721_a_at	-1.7659	7.76468	-8.08074	0.00351337	0.153084	EDIL3	EGF-like repeats and discoidin I-like domains 3
11733461_at	-3.41217	9.20382	-8.07833	0.0035165	0.153084	SUSD5	sushi domain containing 5
11739385_x_at	-1.38975	9.20608	-8.0782	0.00351667	0.153084	ROCK2	Rho-associated, coiled-coil containing protein kinase 2
11749584_a_at	-1.24669	8.95689	-8.07723	0.00351794	0.153084	UBA2	ubiquitin-like modifier activating enzyme 2
11732709_x_at	-1.44863	8.52789	-8.07292	0.00352354	0.153084	SGCA	sarcoglycan, alpha (50kDa dystrophin-associated glycoprotein)
11727876_at	1.61453	8.30978	8.07227	0.00352439	0.153084	CYBB	cytochrome b-245, beta polypeptide
11739189_at	-1.1458	7.57772	-8.07109	0.00352592	0.153084	AKT3	v-akt murine thymoma viral oncogene homolog 3 (protein kinase B, gamma)
11729226_x_at	1.31727	8.16831	8.06325	0.00353617	0.153394	ITGAL	integrin, alpha L (antigen CD11A (p180), lymphocyte function-associated antigen 1; alpha polypeptide)
11756726_a_at	-1.13748	8.9273	-8.05924	0.00354143	0.153488	SOD3	superoxide dismutase 3, extracellular
11752290_s_at	-1.15002	8.47228	-8.04446	0.00356088	0.154196	ROR1	receptor tyrosine kinase-like orphan receptor 1
11751356_s_at	1.13649	10.156	8.04128	0.00356509	0.154243	SDCBP	syndecan binding protein (syntenin)
11755009_s_at	-1.14953	12.0867	-8.03815	0.00356924	0.154288	VCAN	versican
11732925_s_at	-1.64719	7.73352	-8.02794	0.0035828	0.154523	PEAR1	platelet endothelial aggregation receptor 1
11747389_a_at	-1.12929	10.3288	-8.02769	0.00358313	0.154523	SRSF5	serine/arginine-rich splicing factor 5
11752545_a_at	-1.90201	8.95704	-8.02701	0.00358403	0.154523	PDLIM5	PDZ and LIM domain 5
11724143_s_at	-1.13953	8.79567	-8.02302	0.00358936	0.154574	RAB11FIP2	RAB11 family interacting protein 2 (class I)
11758219_x_at	1.85433	6.85224	8.01984	0.00359361	0.154574	RRM2	ribonucleotide reductase M2
11758520_s_at	-1.63241	8.55079	-8.01882	0.00359497	0.154574	GUCY1A3	guanylate cyclase 1, soluble, alpha 3
11738858_x_at	1.19487	7.05813	8.01499	0.0036001	0.154574	CSF2RA	colony stimulating factor 2 receptor, alpha, low-affinity (granulocyte-macrophage)
11731639_a_at	-1.12565	7.74588	-8.01443	0.00360086	0.154574	GAB1	GRB2-associated binding protein 1
11721952_at	-2.68191	8.50819	-8.00839	0.00360896	0.154788	MRAP2	melanocortin 2 receptor accessory protein 2
11754949_s_at	-2.60497	10.2257	-8.00515	0.00361333	0.154841	HSPB7	heat shock 27kDa protein family, member 7 (cardiovascular)
11744337_a_at	1.9735	11.3745	7.99819	0.00362272	0.154994	GLUL	glutamate-ammonia ligase
11727999_a_at	-1.15563	7.90643	-7.99712	0.00362416	0.154994	MYEF2	myelin expression factor 2
11758137_s_at	-1.50236	9.03917	-7.99417	0.00362815	0.154994	SPOPL	speckle-type POZ protein-like
11719732_at	1.17221	7.24035	7.99324	0.00362941	0.154994	C12orf5	chromosome 12 open reading frame 5
11717874_a_at	1.38364	8.03869	7.98604	0.00363918	0.155199	IRF8	interferon regulatory factor 8
11758260_x_at	1.13565	13.0972	7.97963	0.0036479	0.155199	B2M	beta-2-microglobulin
11729350_a_at	1.4783	6.91746	7.97829	0.00364973	0.155199	MMP8	matrix metallopeptidase 8 (neutrophil collagenase)
11717858_a_at	1.81073	7.56271	7.97809	0.00365001	0.155199	CD37	CD37 molecule
11720615_a_at	-1.14574	9.29688	-7.97787	0.00365031	0.155199	TUBG2	tubulin, gamma 2
11744369_s_at	-1.26747	9.28879	-7.97443	0.00365501	0.155199	EPB41L4A-AS1	EPB41L4A antisense RNA 1
11727045_at	1.36784	6.9641	7.97358	0.00365617	0.155199	CNIH3	cornichon homolog 3 (Drosophila)
11736718_a_at	-1.56727	8.89206	-7.96659	0.00366575	0.155452	NCALD	neurocalcin delta
11721202_at	1.86509	8.81888	7.96248	0.0036714	0.155452	RNASE6	ribonuclease, RNase A family, k6
11726796_a_at	-2.6788	8.12948	-7.96002	0.00367478	0.155452	NEXN	nexilin (F actin binding protein)
11719780_at	1.31022	7.64508	7.95667	0.0036794	0.155452	TNFAIP8L2	tumor necrosis factor, alpha-induced protein 8-like 2
11718554_a_at	1.1204	9.00934	7.95512	0.00368154	0.155452	MCOLN1	mucolipin 1
11718428_x_at	-1.23194	9.66368	-7.95264	0.00368496	0.155452	SOD3	superoxide dismutase 3, extracellular
11754772_s_at	-2.26445	9.71666	-7.94959	0.00368918	0.155452	NR4A1	nuclear receptor subfamily 4, group A, member 1
11748747_a_at	1.18397	7.35606	7.94801	0.00369137	0.155452	ARHGAP25	Rho GTPase activating protein 25
11717982_a_at	-1.15581	10.0778	-7.94713	0.00369259	0.155452	FBXL3	F-box and leucine-rich repeat protein 3
11753764_s_at	1.59882	7.6452	7.94644	0.00369354	0.155452	TNFRSF21	tumor necrosis factor receptor superfamily, member 21
11726820_a_at	1.11995	8.34907	7.93637	0.00370753	0.155602	ARHGAP9	Rho GTPase activating protein 9
11756527_a_at	1.15573	6.78393	7.93541	0.00370887	0.155602	SNX10	sorting nexin 10
11753679_x_at	-1.18069	7.97592	-7.9279	0.00371936	0.155602	SNCG	synuclein, gamma (breast cancer-specific protein 1)
11726539_a_at	-1.11965	10.2995	-7.925	0.00372341	0.155602	OSBPL9	oxysterol binding protein-like 9
11715202_s_at	-1.46252	9.82602	-7.9245	0.00372411	0.155602	TCEAL1	transcription elongation factor A (SII)-like 1
11750001_x_at	1.16134	6.93695	7.92204	0.00372757	0.155602	CLEC7A	C-type lectin domain family 7, member A
11750141_a_at	-1.29142	7.87685	-7.92194	0.00372771	0.155602	CTPS1	CTP synthase 1
11732432_a_at	1.264	7.41413	7.92168	0.00372806	0.155602	GK	glycerol kinase
11751178_a_at	1.74779	8.28332	7.91858	0.00373242	0.155602	ATP6V1A	ATPase, H+ transporting, lysosomal 70kDa, V1 subunit A
11741363_a_at	-1.20039	8.12862	-7.91813	0.00373306	0.155602	RAB23	RAB23, member RAS oncogene family
11721643_at	-1.1115	9.02501	-7.91739	0.00373409	0.155602	ARL1	ADP-ribosylation factor-like 1
11727153_s_at	-1.15023	7.72518	-7.91688	0.00373481	0.155602	LRRC1	leucine rich repeat containing 1
11719953_s_at	1.14529	8.84776	7.91451	0.00373814	0.155609	FKBP15	FK506 binding protein 15, 133kDa
11731668_x_at	-1.17308	8.51076	-7.91033	0.00374404	0.155724	SGCA	sarcoglycan, alpha (50kDa dystrophin-associated glycoprotein)
11716392_s_at	-1.76236	9.67566	-7.90707	0.00374864	0.155744	ADH5	alcohol dehydrogenase 5 (class III), chi polypeptide
11749827_a_at	1.34787	7.60301	7.90553	0.00375082	0.155744	CYBB	cytochrome b-245, beta polypeptide
11728805_a_at	1.31258	7.7073	7.90261	0.00375495	0.155785	CADM1	cell adhesion molecule 1
11717854_a_at	-1.74262	9.4273	-7.89963	0.00375918	0.155801	ZSCAN18	zinc finger and SCAN domain containing 18
11722555_s_at	-1.12864	9.36807	-7.89643	0.00376372	0.155801	HADH	hydroxyacyl-CoA dehydrogenase
11717555_at	-1.23602	10.1229	-7.89568	0.00376479	0.155801	SETD7	SET domain containing (lysine methyltransferase) 7
11745543_x_at	-1.13272	7.53266	-7.89051	0.00377214	0.155826	AJUBA	ajuba LIM protein
11728062_a_at	1.10767	8.32522	7.89015	0.00377266	0.155826	SH3BP1	SH3-domain binding protein 1
11732785_a_at	-1.40398	9.71769	-7.88862	0.00377484	0.155826	C16orf45	chromosome 16 open reading frame 45
11731190_at	-1.11058	6.89618	-7.88275	0.00378322	0.155884	KIAA2022	KIAA2022
11759497_at	1.15124	8.64041	7.88018	0.0037869	0.155884	CHST11	carbohydrate (chondroitin 4) sulfotransferase 11
11752879_x_at	-1.46903	7.73035	-7.87909	0.00378845	0.155884	SMTN	smoothelin
11716993_a_at	2.00436	9.01875	7.87774	0.0037904	0.155884	CSF1R	colony stimulating factor 1 receptor
11758231_x_at	1.4821	11.2496	7.87245	0.00379799	0.155884	HLA-DPA1	major histocompatibility complex, class II, DP alpha 1
11751571_x_at	-1.10543	8.0266	-7.87217	0.00379839	0.155884	SGCA	sarcoglycan, alpha (50kDa dystrophin-associated glycoprotein)
11744969_a_at	1.60034	7.74831	7.86944	0.00380232	0.155884	PAPLN	papilin, proteoglycan-like sulfated glycoprotein
11757490_s_at	-1.57982	10.4588	-7.86764	0.00380491	0.155884	TSPYL1	TSPY-like 1
11735767_at	1.22784	7.29417	7.86457	0.00380933	0.155884	C16orf54	chromosome 16 open reading frame 54
11734064_a_at	1.39395	7.37338	7.86151	0.00381376	0.155884	AMPD3	adenosine monophosphate deaminase 3
11728278_at	-1.10979	8.1304	-7.85989	0.0038161	0.155884	PLA2G12A	phospholipase A2, group XIIA
11719951_a_at	1.14171	7.88931	7.85801	0.00381883	0.155884	FKBP15	FK506 binding protein 15, 133kDa
11763785_x_at	1.26805	8.5229	7.85701	0.00382027	0.155884	KCNN4	potassium intermediate/small conductance calcium-activated channel, subfamily N, member 4
11720000_at	-1.10964	9.27677	-7.85696	0.00382034	0.155884	SYNJ2BP	synaptojanin 2 binding protein
11757784_s_at	-1.14066	11.0135	-7.85053	0.00382968	0.156137	RPL22	ribosomal protein L22
11726357_a_at	-1.11133	9.36454	-7.8483	0.00383291	0.15614	KMT2E	lysine (K)-specific methyltransferase 2E
11749780_a_at	1.43116	7.36556	7.83885	0.0038467	0.156474	BCAT1	branched chain amino-acid transaminase 1, cytosolic
11718461_at	1.5467	8.26556	7.83834	0.00384744	0.156474	SLC39A11	solute carrier family 39 (metal ion transporter), member 11
11722170_a_at	1.15302	8.13988	7.83006	0.00385958	0.156659	CORO7	coronin 7
11732596_a_at	1.22514	7.31241	7.82851	0.00386185	0.156659	SIGLEC15	sialic acid binding Ig-like lectin 15
11721317_at	-1.57899	8.27191	-7.82739	0.00386351	0.156659	PARM1	prostate androgen-regulated mucin-like protein 1
11750720_s_at	1.14348	7.30475	7.82433	0.00386801	0.156659	GK	glycerol kinase
11720708_a_at	1.26832	7.46671	7.82252	0.00387066	0.156659	PPARG	peroxisome proliferator-activated receptor gamma
11715866_x_at	1.64113	10.3157	7.82035	0.00387386	0.156659	ATP6V1F	ATPase, H+ transporting, lysosomal 14kDa, V1 subunit F
11716997_x_at	1.12612	9.61876	7.82017	0.00387414	0.156659	TSPAN4	tetraspanin 4
11763787_a_at	1.17992	6.84176	7.81375	0.00388362	0.156705	ITGAX	integrin, alpha X (complement component 3 receptor 4 subunit)
11725937_a_at	1.26426	12.4216	7.81344	0.00388408	0.156705	LGALS3	lectin, galactoside-binding, soluble, 3
11719981_a_at	-3.62589	9.67667	-7.81249	0.00388549	0.156705	RBPMS	RNA binding protein with multiple splicing
11751751_a_at	-1.18092	9.45317	-7.81084	0.00388794	0.156705	HNRNPH3	heterogeneous nuclear ribonucleoprotein H3 (2H9)
11719985_a_at	1.11116	8.31244	7.80122	0.00390224	0.157053	BLOC1S2	biogenesis of lysosomal organelles complex-1, subunit 2
11748676_a_at	1.39045	7.57949	7.79862	0.00390611	0.157053	MAPK13	mitogen-activated protein kinase 13
11733075_a_at	-1.42724	9.09093	-7.79667	0.00390901	0.157053	PPP1R12A	protein phosphatase 1, regulatory subunit 12A
11718706_s_at	-1.61035	8.46841	-7.79643	0.00390937	0.157053	IGF1R	insulin-like growth factor 1 receptor
11730814_a_at	2.9578	8.20363	7.79438	0.00391244	0.157053	LILRB4	leukocyte immunoglobulin-like receptor, subfamily B (with TM and ITIM domains), member 4
11719191_s_at	-1.25303	9.41608	-7.79074	0.00391788	0.157144	FBXO9	F-box protein 9
11763648_x_at	1.12349	7.22274	7.78739	0.0039229	0.157218	APOC1	apolipoprotein C-I
11752717_x_at	-1.24368	11.2532	-7.77764	0.00393756	0.157615	CCNI	cyclin I
11752716_s_at	-1.22851	11.4459	-7.77608	0.00393992	0.157615	CCNI	cyclin I
11721380_x_at	1.32425	8.37157	7.77256	0.00394524	0.157615	GNPTAB	N-acetylglucosamine-1-phosphate transferase, alpha and beta subunits
11725582_at	-1.28613	7.72599	-7.77234	0.00394556	0.157615	IL17B	interleukin 17B
11730338_a_at	-2.06929	8.62744	-7.7591	0.00396563	0.158289	SMAD6	SMAD family member 6
11742710_a_at	2.05232	11.4629	7.7507	0.00397845	0.158673	SRGN	serglycin
11719193_a_at	-1.09134	8.66914	-7.74208	0.00399164	0.159043	CBY1	chibby homolog 1 (Drosophila)
11740526_x_at	1.11254	9.62795	7.74044	0.00399415	0.159043	TSPAN4	tetraspanin 4
11734842_at	-1.08564	8.88585	-7.73367	0.00400456	0.159223	MPHOSPH8	M-phase phosphoprotein 8
11749367_a_at	1.0998	10.2982	7.73332	0.0040051	0.159223	FXYD5	FXYD domain containing ion transport regulator 5
11718196_x_at	1.172	9.58957	7.72919	0.00401149	0.159244	ATP6V0D1	ATPase, H+ transporting, lysosomal 38kDa, V0 subunit d1
11747408_x_at	-1.20626	9.92471	-7.72807	0.00401321	0.159244	FBLIM1	filamin binding LIM protein 1
11743113_x_at	1.29987	11.5201	7.72575	0.0040168	0.159244	S100A10	S100 calcium binding protein A10
11744641_a_at	-1.21349	9.52488	-7.72465	0.00401851	0.159244	CLDND1	claudin domain containing 1
11732181_x_at	1.99863	7.95127	7.71594	0.00403202	0.159375	PTAFR	platelet-activating factor receptor
11728497_s_at	-2.80348	9.28204	-7.71327	0.00403616	0.159375	SVIL	supervillin
11716641_x_at	1.1054	9.06936	7.71076	0.00404008	0.159375	PSMB10	proteasome (prosome, macropain) subunit, beta type, 10
11724103_x_at	1.13072	8.00237	7.71065	0.00404025	0.159375	C8orf44-SGK3 /// SGK3	C8orf44-SGK3 readthrough /// serum/glucocorticoid regulated kinase family, member 3
11734763_at	-1.12912	8.22073	-7.70313	0.004052	0.159375	HIP1	huntingtin interacting protein 1
11749131_a_at	-1.10016	9.32237	-7.70182	0.00405405	0.159375	DDX24	DEAD (Asp-Glu-Ala-Asp) box polypeptide 24
11755122_a_at	-2.34459	10.5526	-7.6988	0.00405878	0.159375	PALLD	palladin, cytoskeletal associated protein
11716042_x_at	-1.14176	10.7735	-7.69839	0.00405942	0.159375	PPP2CB	protein phosphatase 2, catalytic subunit, beta isozyme
11744333_x_at	-1.15057	11.5144	-7.69599	0.00406319	0.159375	CD151	CD151 molecule (Raph blood group)
11754429_a_at	-1.24028	8.09175	-7.68912	0.004074	0.159375	LAMA2	laminin, alpha 2
11717531_x_at	-1.2212	8.75384	-7.68593	0.00407903	0.159375	UBA2	ubiquitin-like modifier activating enzyme 2
11758578_s_at	-1.32134	7.75169	-7.68578	0.00407927	0.159375	AEBP2	AE binding protein 2
11716659_a_at	-1.21887	9.83133	-7.68567	0.00407945	0.159375	HNRNPH3	heterogeneous nuclear ribonucleoprotein H3 (2H9)
11717039_a_at	-1.73993	10.1487	-7.68338	0.00408306	0.159375	GADD45A	growth arrest and DNA-damage-inducible, alpha
11724865_at	-1.3362	6.84773	-7.68301	0.00408364	0.159375	OSR1	odd-skipped related 1 (Drosophila)
11749844_x_at	1.09743	7.28553	7.68258	0.00408432	0.159375	CSF2RA	colony stimulating factor 2 receptor, alpha, low-affinity (granulocyte-macrophage)
11719784_x_at	-1.07955	10.0091	-7.68036	0.00408784	0.159375	RPS23	ribosomal protein S23
11718926_a_at	-1.57941	10.0524	-7.67392	0.00409805	0.159375	ARID5B	AT rich interactive domain 5B (MRF1-like)
11744567_a_at	1.09549	6.63116	7.67007	0.00410416	0.159375	CD72	CD72 molecule
11733877_s_at	-1.645	7.82062	-7.6664	0.00411002	0.159375	LMO7	LIM domain 7
11740476_a_at	-1.12462	7.87361	-7.66587	0.00411086	0.159375	NOX4	NADPH oxidase 4
11747608_a_at	1.13362	6.80503	7.66452	0.00411302	0.159375	P2RX7	purinergic receptor P2X, ligand-gated ion channel, 7
11757697_s_at	1.78002	9.63748	7.6638	0.00411416	0.159375	FAM96A	family with sequence similarity 96, member A
11738121_a_at	-1.26977	7.64488	-7.66279	0.00411578	0.159375	SNX18	sorting nexin 18
11750611_a_at	-1.15872	7.56177	-7.65631	0.00412615	0.159375	ERBB2	v-erb-b2 erythroblastic leukemia viral oncogene homolog 2, neuro/glioblastoma derived oncogene homolog (avian)
11749125_a_at	-1.08613	7.65782	-7.65462	0.00412885	0.159375	FZD6	frizzled family receptor 6
11715447_at	1.07776	10.9863	7.65147	0.00413391	0.159375	TALDO1	transaldolase 1
11757865_a_at	-1.36676	10.3586	-7.65092	0.00413479	0.159375	GADD45B	growth arrest and DNA-damage-inducible, beta
11743320_x_at	-1.44045	9.04501	-7.65042	0.00413559	0.159375	DST	dystonin
11742818_a_at	2.14608	8.79438	7.64421	0.00414559	0.159375	PLAUR	plasminogen activator, urokinase receptor
11749573_a_at	1.69192	7.91833	7.64396	0.00414599	0.159375	ARRB2	arrestin, beta 2
11734833_s_at	-1.0997	8.30314	-7.64351	0.00414671	0.159375	TAF9B	TAF9B RNA polymerase II, TATA box binding protein (TBP)-associated factor, 31kDa
11756236_a_at	-2.40273	9.61581	-7.64245	0.00414843	0.159375	FBLN1	fibulin 1
11743723_a_at	1.38639	8.09339	7.64117	0.0041505	0.159375	GALC	galactosylceramidase
11718290_a_at	1.07319	10.2428	7.63367	0.00416263	0.159375	FXYD5	FXYD domain containing ion transport regulator 5
11752499_a_at	-2.08495	9.85658	-7.63022	0.00416824	0.159375	CALD1	caldesmon 1
11716406_x_at	1.30761	8.8323	7.62984	0.00416885	0.159375	LGALS9	lectin, galactoside-binding, soluble, 9
11727924_at	-1.41356	9.70669	-7.62555	0.00417582	0.159375	PURA	purine-rich element binding protein A
11719262_a_at	-2.5021	9.58013	-7.6254	0.00417606	0.159375	SMTN	smoothelin
11740691_x_at	2.01397	9.01125	7.62516	0.00417645	0.159375	AIF1	allograft inflammatory factor 1
11749896_a_at	-1.45161	8.69861	-7.62039	0.00418423	0.159375	FMOD	fibromodulin
11728926_at	1.34059	7.176	7.62032	0.00418434	0.159375	NFAM1	NFAT activating protein with ITAM motif 1
11757783_s_at	-1.07978	11.4179	-7.61952	0.00418565	0.159375	VCAN	versican
11727067_a_at	-1.86397	8.47217	-7.61854	0.00418724	0.159375	SLIT3	slit homolog 3 (Drosophila)
11723639_s_at	-1.06998	9.22089	-7.61848	0.00418735	0.159375	C11orf58	chromosome 11 open reading frame 58
11757341_s_at	-1.39697	8.42798	-7.61839	0.00418749	0.159375	OPTN	optineurin
11720521_at	-1.53592	8.7036	-7.61794	0.00418824	0.159375	ARHGEF17	Rho guanine nucleotide exchange factor (GEF) 17
11717530_a_at	-1.27176	8.74113	-7.61365	0.00419524	0.159375	UBA2	ubiquitin-like modifier activating enzyme 2
11733477_at	1.10711	7.05246	7.61294	0.00419641	0.159375	SUCNR1	succinate receptor 1
11758772_x_at	1.53373	11.1779	7.61188	0.00419815	0.159375	HLA-DPB1	major histocompatibility complex, class II, DP beta 1
11722908_a_at	-1.4052	7.37573	-7.61104	0.00419953	0.159375	KLHL13	kelch-like family member 13
11749847_a_at	2.34259	7.38759	7.60913	0.00420266	0.159375	MSR1	macrophage scavenger receptor 1
11729526_a_at	1.89423	7.57845	7.60906	0.00420277	0.159375	SLC37A2	solute carrier family 37 (glycerol-3-phosphate transporter), member 2
11725965_a_at	-2.60835	9.38842	-7.60763	0.00420513	0.159375	CAV2	caveolin 2
11729334_a_at	-2.60835	9.38842	-7.60763	0.00420513	0.159375	CAV2	caveolin 2
11720331_at	-2.76285	10.7091	-7.60727	0.00420572	0.159375	SELM	selenoprotein M
11754516_a_at	1.13386	8.1556	7.60652	0.00420695	0.159375	CD109	CD109 molecule
11736045_a_at	-2.42217	8.29488	-7.60308	0.00421261	0.159375	MYH10	myosin, heavy chain 10, non-muscle
11717883_x_at	-1.08922	7.86503	-7.60268	0.00421326	0.159375	ZHX3	zinc fingers and homeoboxes 3
11732266_x_at	1.40697	6.79336	7.5985	0.00422015	0.159375	LILRB1	leukocyte immunoglobulin-like receptor, subfamily B (with TM and ITIM domains), member 1
11728530_a_at	1.29367	7.67485	7.59575	0.00422469	0.159375	BLNK	B-cell linker
11733360_x_at	-2.50637	7.79649	-7.5945	0.00422677	0.159375	SLC14A1	solute carrier family 14 (urea transporter), member 1 (Kidd blood group)
11742272_s_at	1.06975	7.38236	7.59196	0.00423097	0.159375	TM6SF1	transmembrane 6 superfamily member 1
11732993_a_at	-1.62058	7.83045	-7.59166	0.00423146	0.159375	RGS4	regulator of G-protein signaling 4
11717599_s_at	-1.89403	8.88946	-7.58901	0.00423586	0.159375	SLC20A2	solute carrier family 20 (phosphate transporter), member 2
11744449_a_at	1.16228	8.81449	7.58835	0.00423696	0.159375	ARHGAP4	Rho GTPase activating protein 4
11755717_a_at	1.48306	8.17262	7.58715	0.00423895	0.159375	DOK2	docking protein 2, 56kDa
11757106_s_at	-2.66389	8.58942	-7.58606	0.00424076	0.159375	SVIL	supervillin
11718334_a_at	1.06737	8.92956	7.581	0.00424918	0.159382	GRB2	growth factor receptor-bound protein 2
11721001_at	-1.15383	8.76633	-7.58063	0.00424979	0.159382	HEXIM1	hexamethylene bis-acetamide inducible 1
11741594_a_at	1.80632	9.41226	7.58013	0.00425063	0.159382	LST1	leukocyte specific transcript 1
11721204_a_at	-1.47988	7.15623	-7.57488	0.00425937	0.159566	ANK3	ankyrin 3, node of Ranvier (ankyrin G)
11752842_a_at	-1.14247	9.2211	-7.57241	0.00426351	0.159566	FSTL1	follistatin-like 1
11756063_x_at	-1.06323	10.28	-7.57042	0.00426683	0.159566	SRSF5	serine/arginine-rich splicing factor 5
11757575_x_at	1.12183	7.59709	7.56947	0.00426843	0.159566	HSD17B14	hydroxysteroid (17-beta) dehydrogenase 14
11758889_a_at	-1.06242	9.31504	-7.56628	0.00427377	0.159645	FAM46A	family with sequence similarity 46, member A
11732671_s_at	-1.91931	9.7194	-7.5613	0.00428215	0.159838	CCDC107	coiled-coil domain containing 107
11716394_x_at	-1.20048	10.5366	-7.55641	0.00429038	0.159985	ADH5	alcohol dehydrogenase 5 (class III), chi polypeptide
11719677_a_at	-1.1013	8.18821	-7.55513	0.00429254	0.159985	MED21	mediator complex subunit 21
11729130_at	-1.09686	8.93946	-7.55265	0.00429673	0.160006	ANAPC16	anaphase promoting complex subunit 16
11755810_s_at	-1.11443	8.42576	-7.55095	0.00429959	0.160006	TAPT1	transmembrane anterior posterior transformation 1
11716996_a_at	1.25829	9.7349	7.53821	0.00432122	0.160515	TSPAN4	tetraspanin 4
11762641_x_at	1.51598	6.8293	7.53547	0.00432588	0.160515	HLA-DQB1	major histocompatibility complex, class II, DQ beta 1
11744450_x_at	1.05922	8.65581	7.53374	0.00432884	0.160515	ARHGAP4	Rho GTPase activating protein 4
11751613_x_at	1.1603	9.88672	7.53357	0.00432913	0.160515	C20orf24	chromosome 20 open reading frame 24
11730176_x_at	-1.06088	9.63034	-7.53183	0.0043321	0.160515	C4orf3	chromosome 4 open reading frame 3
11721387_at	1.66382	8.67987	7.53146	0.00433272	0.160515	LACTB	lactamase, beta
11722758_at	-1.43644	8.1827	-7.52298	0.00434725	0.160749	NPR3	natriuretic peptide receptor C/guanylate cyclase C (atrionatriuretic peptide receptor C)
11727143_x_at	1.71783	7.87338	7.51926	0.00435364	0.160749	EPB41L3	erythrocyte membrane protein band 4.1-like 3
11757336_s_at	-2.5306	9.76279	-7.518	0.00435581	0.160749	LIMCH1	LIM and calponin homology domains 1
11725899_a_at	1.05616	7.36943	7.51649	0.00435841	0.160749	LRRC8D	leucine rich repeat containing 8 family, member D
11732180_a_at	1.96767	7.94447	7.5162	0.00435891	0.160749	PTAFR	platelet-activating factor receptor
11718520_at	-1.0587	7.81007	-7.51603	0.00435919	0.160749	KCMF1	potassium channel modulatory factor 1
11745965_a_at	-1.06233	8.00316	-7.51214	0.0043659	0.160749	IDH3A	isocitrate dehydrogenase 3 (NAD+) alpha
11734819_s_at	-1.28905	8.22262	-7.50961	0.00437027	0.160749	APBB2	amyloid beta (A4) precursor protein-binding, family B, member 2
11718578_a_at	-1.25332	8.76523	-7.50948	0.00437049	0.160749	GSTM3	glutathione S-transferase mu 3 (brain)
11722480_a_at	2.18703	8.78515	7.50707	0.00437465	0.160749	FGR	Gardner-Rasheed feline sarcoma viral (v-fgr) oncogene homolog
11740068_at	-1.0609	7.70887	-7.50701	0.00437476	0.160749	CCDC8	coiled-coil domain containing 8
11753519_a_at	1.08338	7.50197	7.50432	0.00437942	0.160801	GSAP	gamma-secretase activating protein
11724654_a_at	-1.05326	8.189	-7.49545	0.00439482	0.161174	ZBTB47	zinc finger and BTB domain containing 47
11729906_x_at	-1.24886	7.52761	-7.49472	0.00439609	0.161174	LRCH2	leucine-rich repeats and calponin homology (CH) domain containing 2
11727893_at	-2.66447	9.7683	-7.48938	0.0044054	0.161357	PRELP	proline/arginine-rich end leucine-rich repeat protein
11728267_s_at	1.77919	7.453	7.48811	0.00440762	0.161357	LILRB1 /// LILRB2	leukocyte immunoglobulin-like receptor, subfamily B (with TM and ITIM domains), member 1 /// leukocyte immunoglobulin-like receptor, subfamily B (with TM and ITIM domains), member 2
11756155_a_at	-1.71511	8.04048	-7.48286	0.0044168	0.16138	NHS	Nance-Horan syndrome (congenital cataracts and dental anomalies)
11723214_a_at	-1.58927	9.21122	-7.48133	0.00441948	0.16138	MEF2C	myocyte enhancer factor 2C
11731340_at	1.07561	7.34679	7.48016	0.00442154	0.16138	NOD2	nucleotide-binding oligomerization domain containing 2
11756509_a_at	-1.05544	7.70361	-7.47927	0.0044231	0.16138	BAMBI	BMP and activin membrane-bound inhibitor homolog (Xenopus laevis)
11743112_at	1.28913	11.34	7.47728	0.00442659	0.16138	S100A10	S100 calcium binding protein A10
11742107_a_at	1.22563	10.3545	7.47659	0.00442781	0.16138	PPT1	palmitoyl-protein thioesterase 1
11757476_x_at	1.06827	7.24324	7.47459	0.00443132	0.161389	TNNT1	troponin T type 1 (skeletal, slow)
11729661_a_at	1.07903	9.1927	7.47036	0.00443878	0.161441	GLB1	galactosidase, beta 1
11749055_a_at	-1.34333	8.15833	-7.47009	0.00443925	0.161441	MRVI1	murine retrovirus integration site 1 homolog
11725040_at	-1.08777	7.41869	-7.46816	0.00444266	0.161446	FGF2	fibroblast growth factor 2 (basic)
11724399_a_at	1.31061	7.96601	7.46571	0.00444697	0.161484	DDX60L	DEAD (Asp-Glu-Ala-Asp) box polypeptide 60-like
11715305_s_at	-1.18175	8.3126	-7.45535	0.00446535	0.161974	HOXA10	homeobox A10
11728811_at	-1.0986	7.46488	-7.44728	0.00447971	0.161974	OTUD7B	OTU domain containing 7B
11758483_s_at	1.23744	9.3235	7.44652	0.00448107	0.161974	ARRDC4	arrestin domain containing 4
11730733_x_at	1.11764	9.38049	7.44457	0.00448455	0.161974	DNASE2	deoxyribonuclease II, lysosomal
11742912_a_at	-1.37422	7.58703	-7.44277	0.00448777	0.161974	GAREM	GRB2 associated, regulator of MAPK1
11763423_x_at	1.14423	9.47684	7.4411	0.00449075	0.161974	ATP6V0D1	ATPase, H+ transporting, lysosomal 38kDa, V0 subunit d1
11751225_s_at	1.07244	7.05477	7.44106	0.00449082	0.161974	CSF2RA	colony stimulating factor 2 receptor, alpha, low-affinity (granulocyte-macrophage)
11715948_at	1.06269	9.66674	7.44082	0.00449126	0.161974	KCTD12	potassium channel tetramerisation domain containing 12
11717128_a_at	1.11005	7.76754	7.43927	0.00449404	0.161974	CLN6	ceroid-lipofuscinosis, neuronal 6, late infantile, variant
11718095_s_at	-1.4966	9.21309	-7.4391	0.00449434	0.161974	RNF38	ring finger protein 38
11716393_x_at	-1.76657	9.57098	-7.43792	0.00449646	0.161974	ADH5	alcohol dehydrogenase 5 (class III), chi polypeptide
11757766_s_at	-3.84505	10.3314	-7.4337	0.00450403	0.162018	MAP1B	microtubule-associated protein 1B
11746856_a_at	-3.48722	9.80758	-7.43075	0.00450934	0.162018	SERPINE1	serpin peptidase inhibitor, clade E (nexin, plasminogen activator inhibitor type 1), member 1
11741262_x_at	-3.08418	9.36589	-7.43025	0.00451023	0.162018	SORBS2	sorbin and SH3 domain containing 2
11730372_a_at	1.28191	7.03672	7.42869	0.00451306	0.162018	FYB	FYN binding protein
11725041_at	-1.05635	7.47366	-7.42646	0.00451706	0.162018	FGF2	fibroblast growth factor 2 (basic)
11748164_a_at	-1.19426	10.6535	-7.42633	0.00451731	0.162018	VCAN	versican
11755044_x_at	1.55774	8.26286	7.4188	0.00453093	0.162346	GSAP	gamma-secretase activating protein
11759761_x_at	-1.26274	11.2047	-7.41491	0.00453796	0.162346	---	---
11756045_s_at	-2.06567	9.12173	-7.41319	0.00454109	0.162346	AQP1	aquaporin 1 (Colton blood group)
11732446_x_at	-2.00819	9.44909	-7.41165	0.00454389	0.162346	RBPMS	RNA binding protein with multiple splicing
11721578_at	-1.42174	8.9024	-7.40918	0.00454838	0.162346	WTIP	Wilms tumor 1 interacting protein
11742698_at	1.06716	7.3867	7.40613	0.00455393	0.162346	SCG5	secretogranin V (7B2 protein)
11759290_at	-1.36652	8.9827	-7.4054	0.00455526	0.162346	AKT3	v-akt murine thymoma viral oncogene homolog 3 (protein kinase B, gamma)
11749122_a_at	-1.2554	7.90895	-7.40373	0.00455832	0.162346	MAP7D3	MAP7 domain containing 3
11719186_a_at	-1.18674	8.03898	-7.40332	0.00455907	0.162346	N4BP2L2	NEDD4 binding protein 2-like 2
11763274_a_at	-1.05284	7.81328	-7.40321	0.00455928	0.162346	SIPA1L1	signal-induced proliferation-associated 1 like 1
11738247_a_at	1.07198	7.54404	7.40064	0.00456396	0.162396	TNNT1	troponin T type 1 (skeletal, slow)
11747837_a_at	-1.16698	8.42812	-7.3972	0.00457027	0.162484	ZFAND1	zinc finger, AN1-type domain 1
11720721_s_at	-1.09108	7.33377	-7.39572	0.00457298	0.162484	RRAS2	related RAS viral (r-ras) oncogene homolog 2
11750417_a_at	-1.66435	8.74661	-7.39363	0.00457681	0.162503	PRG4	proteoglycan 4
11721297_at	1.45333	8.53741	7.39133	0.00458104	0.162537	ABRACL	ABRA C-terminal like
11743694_at	-1.11365	9.24978	-7.38949	0.00458441	0.16254	H2AFV	H2A histone family, member V
11742207_a_at	-1.46754	10.8923	-7.38216	0.00459792	0.162887	VCAN	versican
11748750_a_at	3.36671	11.2261	7.37941	0.004603	0.162887	GPNMB	glycoprotein (transmembrane) nmb
11739475_s_at	-1.46819	9.2436	-7.37812	0.00460538	0.162887	NAB1	NGFI-A binding protein 1 (EGR1 binding protein 1)
11724343_at	1.10085	7.67835	7.37705	0.00460737	0.162887	ITGA4	integrin, alpha 4 (antigen CD49D, alpha 4 subunit of VLA-4 receptor)
11745932_x_at	1.08182	13.0797	7.3707	0.00461915	0.163132	TMSB10	thymosin beta 10
11749132_a_at	1.37818	7.84594	7.36875	0.00462276	0.163132	SLCO2B1	solute carrier organic anion transporter family, member 2B1
11717580_a_at	4.71145	8.76453	7.36772	0.00462468	0.163132	CD52	CD52 molecule
11734701_a_at	-3.09329	10.2235	-7.36622	0.00462748	0.163132	DKK3	dickkopf WNT signaling pathway inhibitor 3
11716035_at	1.24658	9.53046	7.36028	0.00463855	0.163364	BST2	bone marrow stromal cell antigen 2
11730467_at	-1.03882	7.28804	-7.3559	0.00464674	0.163364	NTN1	netrin 1
11716302_s_at	1.75206	9.78743	7.35349	0.00465125	0.163364	ACSL1	acyl-CoA synthetase long-chain family member 1
11718983_x_at	2.15752	9.15382	7.35013	0.00465756	0.163364	CCL4 /// CCL4L1 /// CCL4L2 /// LOC101060278	chemokine (C-C motif) ligand 4 /// chemokine (C-C motif) ligand 4-like 1 /// chemokine (C-C motif) ligand 4-like 2 /// c-C motif chemokine 4-like
11743611_a_at	-1.53231	10.3147	-7.34761	0.0046623	0.163364	ZMYND11	zinc finger, MYND-type containing 11
11735112_at	-1.86565	7.28319	-7.34595	0.00466542	0.163364	PTGER3	prostaglandin E receptor 3 (subtype EP3)
11728228_at	2.46107	7.8478	7.34556	0.00466616	0.163364	HAVCR2	hepatitis A virus cellular receptor 2
11756537_a_at	-1.90024	8.84828	-7.34435	0.00466843	0.163364	ECM2	extracellular matrix protein 2, female organ and adipocyte specific
11721109_a_at	-1.54163	7.8359	-7.34405	0.004669	0.163364	NAP1L3	nucleosome assembly protein 1-like 3
11728647_at	-1.24018	9.24636	-7.34362	0.00466981	0.163364	NUCKS1	nuclear casein kinase and cyclin-dependent kinase substrate 1
11728674_a_at	-1.31065	11.0424	-7.34333	0.00467036	0.163364	MRFAP1	Morf4 family associated protein 1
11719761_at	1.22123	8.72534	7.34089	0.00467496	0.163409	ARRDC4	arrestin domain containing 4
11743776_a_at	-1.19738	9.04415	-7.32718	0.00470091	0.164192	GLT8D2	glycosyltransferase 8 domain containing 2
11721665_a_at	-1.27794	8.68663	-7.32402	0.00470694	0.164192	PLA2G16	phospholipase A2, group XVI
11737620_a_at	-1.80144	7.61336	-7.32382	0.00470731	0.164192	PRR16	proline rich 16
11757431_s_at	1.36726	10.0117	7.32151	0.00471172	0.1642	BLOC1S2	biogenesis of lysosomal organelles complex-1, subunit 2
11754367_x_at	-1.03577	8.81909	-7.32022	0.00471418	0.1642	LIMS2	LIM and senescent cell antigen-like domains 2
11741367_a_at	1.10737	9.75746	7.31738	0.0047196	0.164248	SDCBP	syndecan binding protein (syntenin)
11721622_a_at	-1.32425	8.80494	-7.31602	0.0047222	0.164248	KATNAL1	katanin p60 subunit A-like 1
11733065_a_at	-1.02729	8.24413	-7.30302	0.00474713	0.164747	NFYB	nuclear transcription factor Y, beta
11716846_a_at	2.51142	9.69427	7.30297	0.00474724	0.164747	MS4A6A	membrane-spanning 4-domains, subfamily A, member 6A
11726474_a_at	-1.03065	9.14495	-7.30237	0.00474838	0.164747	HES4	hairy and enhancer of split 4 (Drosophila)
11748489_s_at	-1.1576	9.11363	-7.30161	0.00474985	0.164747	MAGED2	melanoma antigen family D, 2
11734578_a_at	-3.65357	10.4031	-7.29591	0.00476085	0.164771	CFH	complement factor H
11742927_a_at	-1.21808	7.91058	-7.29382	0.00476489	0.164771	GSTA4	glutathione S-transferase alpha 4
11762940_x_at	1.05584	10.8293	7.29378	0.00476496	0.164771	HLA-C	major histocompatibility complex, class I, C
11726537_a_at	-1.45675	8.00025	-7.28888	0.00477445	0.164771	KANK2	KN motif and ankyrin repeat domains 2
11726254_s_at	1.78821	10.9396	7.28731	0.00477751	0.164771	CD74	CD74 molecule, major histocompatibility complex, class II invariant chain
11742879_a_at	-1.05139	8.04079	-7.28674	0.00477862	0.164771	CRYZL1	crystallin, zeta (quinone reductase)-like 1
11746020_a_at	-1.1599	8.07909	-7.28641	0.00477925	0.164771	THUMPD2	THUMP domain containing 2
11725863_a_at	-1.02407	8.93111	-7.28548	0.00478106	0.164771	FAM13B	family with sequence similarity 13, member B
11759440_at	-1.03701	9.31786	-7.28529	0.00478143	0.164771	GLS	glutaminase
11717871_s_at	-3.04919	10.3946	-7.28406	0.00478383	0.164771	KANK2	KN motif and ankyrin repeat domains 2
11731536_a_at	-3.35032	9.225	-7.28133	0.00478913	0.164838	FHL5	four and a half LIM domains 5
11751063_a_at	-1.03695	7.75913	-7.27257	0.00480623	0.165275	RAB40B	RAB40B, member RAS oncogene family
11734893_s_at	-2.12703	9.23698	-7.27068	0.00480993	0.165275	SOBP	sine oculis binding protein homolog (Drosophila)
11763808_x_at	1.22898	9.64593	7.26552	0.00482005	0.165275	ATP6V0D1	ATPase, H+ transporting, lysosomal 38kDa, V0 subunit d1
11752915_a_at	-1.04069	6.90151	-7.26547	0.00482016	0.165275	RYR2	ryanodine receptor 2 (cardiac)
11718988_s_at	-1.0226	9.90078	-7.26491	0.00482126	0.165275	RNASE4	ribonuclease, RNase A family, 4
11756988_x_at	1.04115	9.23203	7.26353	0.00482396	0.165275	TWF2	twinfilin actin-binding protein 2
11724004_a_at	1.79764	7.77636	7.2629	0.00482521	0.165275	FYB	FYN binding protein
11743679_a_at	-1.03934	7.57571	-7.25761	0.00483562	0.165275	PTCH1	patched 1
11723669_s_at	1.2885	9.62032	7.25709	0.00483665	0.165275	SEMA3C	sema domain, immunoglobulin domain (Ig), short basic domain, secreted, (semaphorin) 3C
11749485_x_at	-1.10839	8.94611	-7.2557	0.00483938	0.165275	SEC23A	Sec23 homolog A (S. cerevisiae)
11715949_s_at	1.01965	10.8106	7.25498	0.00484081	0.165275	KCTD12	potassium channel tetramerisation domain containing 12
11731195_at	-1.52082	6.97278	-7.25437	0.00484201	0.165275	SEMA3D	sema domain, immunoglobulin domain (Ig), short basic domain, secreted, (semaphorin) 3D
11715657_a_at	1.01824	9.18578	7.25276	0.00484521	0.165275	GLB1	galactosidase, beta 1
11739094_a_at	1.53077	8.98917	7.25102	0.00484864	0.165278	CXCR4	chemokine (C-X-C motif) receptor 4
11729666_at	-1.94145	9.86756	-7.24927	0.00485212	0.165282	STK38L	serine/threonine kinase 38 like
11725130_s_at	-1.70458	9.88925	-7.24733	0.00485595	0.165299	TCEAL3 /// TCEAL6	transcription elongation factor A (SII)-like 3 /// transcription elongation factor A (SII)-like 6
11738068_a_at	1.17199	6.70911	7.24362	0.00486331	0.165436	SLC28A3	solute carrier family 28 (sodium-coupled nucleoside transporter), member 3
11723016_a_at	1.1488	9.15205	7.23762	0.00487526	0.16565	HM13	histocompatibility (minor) 13
11752515_a_at	-1.49532	9.39712	-7.23646	0.00487758	0.16565	ODC1	ornithine decarboxylase 1
11744489_a_at	1.03629	9.90003	7.23531	0.00487986	0.16565	C20orf24 /// TGIF2-C20orf24	chromosome 20 open reading frame 24 /// TGIF2-C20orf24 readthrough
11723928_at	-1.0167	7.32033	-7.23375	0.00488299	0.16565	PNMA2	paraneoplastic Ma antigen 2
11734552_a_at	-1.03295	8.82542	-7.22851	0.00489346	0.165762	CX3CL1	chemokine (C-X3-C motif) ligand 1
11737870_s_at	1.35737	7.59412	7.22848	0.00489352	0.165762	FAM78A	family with sequence similarity 78, member A
11745725_a_at	2.57418	10.961	7.22627	0.00489796	0.165762	GRN	granulin
11733402_a_at	1.12294	7.02743	7.22541	0.00489968	0.165762	CLEC7A	C-type lectin domain family 7, member A
11726362_a_at	-1.04334	8.27876	-7.22125	0.00490803	0.165926	ATXN3	ataxin 3
11742173_x_at	1.46962	9.32184	7.2164	0.0049178	0.165926	LST1	leukocyte specific transcript 1
11726725_a_at	1.42093	8.07009	7.21385	0.00492294	0.165926	NABP1	nucleic acid binding protein 1
11723226_at	-2.1188	8.3962	-7.21041	0.00492989	0.165926	SGCB	sarcoglycan, beta (43kDa dystrophin-associated glycoprotein)
11757557_s_at	1.17	7.55816	7.20827	0.00493423	0.165926	CADM1	cell adhesion molecule 1
11717800_a_at	1.80627	8.53696	7.20679	0.00493723	0.165926	ATF5	activating transcription factor 5
11725603_a_at	-1.38638	7.84805	-7.20674	0.00493732	0.165926	HOXA10-HOXA9 /// HOXA9 /// MIR196B	HOXA10-HOXA9 readthrough /// homeobox A9 /// microRNA 196b
11721418_at	-1.09215	8.59117	-7.20664	0.00493753	0.165926	SH3RF3	SH3 domain containing ring finger 3
11720256_x_at	-1.02818	7.88258	-7.20609	0.00493864	0.165926	SEPT4	septin 4
11727453_a_at	-1.03741	9.38251	-7.20341	0.00494409	0.165926	COPRS	coordinator of PRMT5, differentiation stimulator
11728390_at	-1.51686	8.56177	-7.20236	0.00494622	0.165926	TSPAN2	tetraspanin 2
11715488_s_at	-1.09661	11.0149	-7.19658	0.00495798	0.165926	PGRMC1	progesterone receptor membrane component 1
11733767_a_at	1.11727	7.11421	7.19448	0.00496225	0.165926	LILRA2	leukocyte immunoglobulin-like receptor, subfamily A (with TM domain), member 2
11747085_a_at	-1.08049	8.72664	-7.19305	0.00496518	0.165926	DYNC1LI2	dynein, cytoplasmic 1, light intermediate chain 2
11749895_a_at	1.99232	7.54331	7.18864	0.00497419	0.165926	BCAT1	branched chain amino-acid transaminase 1, cytosolic
11732870_a_at	1.1845	8.27161	7.18699	0.00497756	0.165926	CASP1	caspase 1, apoptosis-related cysteine peptidase
11727684_at	-1.58399	7.71789	-7.18695	0.00497766	0.165926	NTRK3	neurotrophic tyrosine kinase, receptor, type 3
11730177_a_at	-1.09671	10.5429	-7.18492	0.0049818	0.165926	SPOP	speckle-type POZ protein
11716798_x_at	-1.17057	8.60833	-7.183	0.00498574	0.165926	NDN	necdin, melanoma antigen (MAGE) family member
11725039_at	-1.02569	7.01501	-7.18034	0.0049912	0.165926	FGF2	fibroblast growth factor 2 (basic)
11720251_at	4.67563	9.38385	7.18028	0.00499134	0.165926	CCL18 /// LOC101060271	chemokine (C-C motif) ligand 18 (pulmonary and activation-regulated) /// c-C motif chemokine 18-like
11730373_a_at	1.85487	8.00829	7.17958	0.00499277	0.165926	FYB	FYN binding protein
11716661_at	1.01481	7.82944	7.17767	0.00499671	0.165926	GRAMD4	GRAM domain containing 4
11743614_a_at	-1.00718	7.72454	-7.17429	0.00500366	0.165926	USP47	ubiquitin specific peptidase 47
11757453_s_at	-1.29177	9.1271	-7.17419	0.00500388	0.165926	CEP68	centrosomal protein 68kDa
11720283_at	-1.06483	8.01641	-7.17317	0.00500597	0.165926	JMY	junction mediating and regulatory protein, p53 cofactor
11722916_s_at	-1.91533	8.89236	-7.17216	0.00500807	0.165926	BMPR1A	bone morphogenetic protein receptor, type IA
11759555_s_at	-1.42483	10.6569	-7.17119	0.00501006	0.165926	CAMTA1	calmodulin binding transcription activator 1
11756322_x_at	1.48272	10.086	7.17116	0.00501012	0.165926	CNDP2	CNDP dipeptidase 2 (metallopeptidase M20 family)
11719336_a_at	-1.50118	8.56076	-7.17063	0.00501123	0.165926	TEAD3	TEA domain family member 3
11748275_x_at	-1.19506	8.76886	-7.16984	0.00501286	0.165926	FDFT1	farnesyl-diphosphate farnesyltransferase 1
11751783_a_at	1.67707	9.15218	7.16974	0.00501306	0.165926	MFSD1	major facilitator superfamily domain containing 1
11751051_a_at	-1.22526	9.98722	-7.16873	0.00501516	0.165926	DDX24	DEAD (Asp-Glu-Ala-Asp) box polypeptide 24
11721077_a_at	-1.33231	11.1361	-7.16676	0.00501923	0.16595	ESD	esterase D
11725268_s_at	-1.52424	8.29355	-7.16188	0.00502934	0.166082	FAT4	FAT atypical cadherin 4
11730677_a_at	-1.01917	7.39008	-7.15902	0.00503528	0.166082	RNF150	ring finger protein 150
11739052_a_at	1.34666	7.8462	7.1588	0.00503575	0.166082	SLCO2B1	solute carrier organic anion transporter family, member 2B1
11757769_s_at	-2.59394	11.6829	-7.15837	0.00503665	0.166082	VCL	vinculin
11760894_s_at	-1.21405	9.0503	-7.15609	0.00504138	0.166113	SRSF5	serine/arginine-rich splicing factor 5
11745902_a_at	2.02724	11.9569	7.15469	0.0050443	0.166113	NPC2	Niemann-Pick disease, type C2
11743352_s_at	-1.8447	8.83201	-7.15148	0.00505101	0.166189	COBLL1	cordon-bleu WH2 repeat protein-like 1
11756654_s_at	-1.01451	9.08297	-7.15036	0.00505333	0.166189	SUB1	SUB1 homolog (S. cerevisiae)
11751096_a_at	1.45857	7.24784	7.14532	0.00506387	0.166271	SNX10	sorting nexin 10
11728229_a_at	2.27654	7.4935	7.1445	0.00506561	0.166271	HAVCR2	hepatitis A virus cellular receptor 2
11759184_at	1.86123	8.17587	7.14356	0.00506757	0.166271	PLXNC1	plexin C1
11740065_at	1.00433	8.34438	7.14257	0.00506965	0.166271	IL17RA	interleukin 17 receptor A
11750528_x_at	2.47004	8.08418	7.13652	0.00508237	0.166271	HLA-DQA1 /// LOC100509457	major histocompatibility complex, class II, DQ alpha 1 /// HLA class II histocompatibility antigen, DQ alpha 1 chain-like
11718718_a_at	-1.0093	9.20186	-7.1285	0.00509929	0.166271	TOM1L2	target of myb1-like 2 (chicken)
11721206_x_at	-1.02908	7.65342	-7.12831	0.00509968	0.166271	ANK3	ankyrin 3, node of Ranvier (ankyrin G)
11744896_a_at	1.28512	7.71351	7.12821	0.0050999	0.166271	GPSM3	G-protein signaling modulator 3
11720112_at	-1.19437	8.09872	-7.12645	0.00510361	0.166271	SNTB2	syntrophin, beta 2 (dystrophin-associated protein A1, 59kDa, basic component 2)
11731422_s_at	3.06501	10.9054	7.12339	0.0051101	0.166271	FCGR3A	Fc fragment of IgG, low affinity IIIa, receptor (CD16a)
11736113_at	1.31739	8.90099	7.12335	0.00511018	0.166271	ARHGAP18	Rho GTPase activating protein 18
11723215_s_at	-1.87826	9.98411	-7.11964	0.00511805	0.166271	MEF2C	myocyte enhancer factor 2C
11722322_at	-1.57361	7.8163	-7.11945	0.00511845	0.166271	NFASC	neurofascin
11758373_s_at	-1.45008	8.07761	-7.11937	0.00511864	0.166271	NTF3	neurotrophin 3
11745018_a_at	-1.01144	7.80813	-7.11467	0.00512863	0.166271	WLS	wntless homolog (Drosophila)
11717186_a_at	-1.36773	9.32829	-7.11408	0.00512989	0.166271	MEF2D	myocyte enhancer factor 2D
11744660_s_at	1.0564	8.39887	7.1133	0.00513155	0.166271	CCL4L1 /// CCL4L2	chemokine (C-C motif) ligand 4-like 1 /// chemokine (C-C motif) ligand 4-like 2
11744584_a_at	-1.01171	8.28952	-7.11291	0.00513237	0.166271	HYI	hydroxypyruvate isomerase (putative)
11743913_s_at	-1.36664	9.79015	-7.11021	0.00513814	0.166271	SPOP	speckle-type POZ protein
11720633_a_at	-2.43458	9.19075	-7.1091	0.0051405	0.166271	FLNC	filamin C, gamma
11745194_a_at	-1.05871	7.78899	-7.10907	0.00514057	0.166271	OXCT1	3-oxoacid CoA transferase 1
11720599_s_at	-1.35136	8.63523	-7.10906	0.00514059	0.166271	SUB1	SUB1 homolog (S. cerevisiae)
11746689_a_at	-0.998708	8.95461	-7.10777	0.00514336	0.166271	FAM46A	family with sequence similarity 46, member A
11731557_at	-1.87536	8.14826	-7.10611	0.0051469	0.166271	SYNPO2	synaptopodin 2
11743908_a_at	-1.22043	8.30477	-7.10528	0.00514867	0.166271	CTPS1	CTP synthase 1
11746363_x_at	1.0078	10.1293	7.10528	0.00514869	0.166271	SYNGR2	synaptogyrin 2
11716034_a_at	1.42771	9.22486	7.10473	0.00514986	0.166271	BST2	bone marrow stromal cell antigen 2
11747785_s_at	3.40715	9.42497	7.10415	0.00515111	0.166271	LCP1	lymphocyte cytosolic protein 1 (L-plastin)
11734994_s_at	-1.30156	9.93551	-7.10127	0.00515728	0.166271	SKI	v-ski sarcoma viral oncogene homolog (avian)
11764283_s_at	-1.36948	9.13153	-7.10047	0.00515898	0.166271	PNISR	PNN-interacting serine/arginine-rich protein
11758261_s_at	1.41107	6.74458	7.09768	0.00516498	0.166271	CEP55	centrosomal protein 55kDa
11740510_a_at	-2.25944	9.18125	-7.09747	0.00516543	0.166271	SSPN	sarcospan
11745192_a_at	1.45498	7.67321	7.09689	0.00516668	0.166271	EPB41L3	erythrocyte membrane protein band 4.1-like 3
11744067_s_at	1.04122	10.4212	7.09515	0.00517044	0.166284	SYNGR2	synaptogyrin 2
11723341_x_at	-1.00396	9.35657	-7.09159	0.0051781	0.166289	OXR1	oxidation resistance 1
11757297_s_at	-5.03756	11.4301	-7.09124	0.00517886	0.166289	RGS5	regulator of G-protein signaling 5
11727570_a_at	-1.1083	7.13204	-7.08775	0.00518639	0.166289	MARK1	MAP/microtubule affinity-regulating kinase 1
11718393_s_at	-1.61349	9.27228	-7.08284	0.00519702	0.166289	PREPL	prolyl endopeptidase-like
11721345_at	0.999034	7.19534	7.0812	0.00520058	0.166289	PLEK2	pleckstrin 2
11721765_at	1.30325	6.96384	7.08021	0.00520271	0.166289	ADRBK2	adrenergic, beta, receptor kinase 2
11754159_a_at	1.13419	6.55072	7.08006	0.00520305	0.166289	CD28	CD28 molecule
11737148_x_at	1.26234	7.65026	7.0796	0.00520403	0.166289	CLEC7A	C-type lectin domain family 7, member A
11719976_at	-1.21874	8.28133	-7.07925	0.0052048	0.166289	WASF3	WAS protein family, member 3
11724653_at	-0.995197	7.65746	-7.07583	0.00521223	0.166289	ZBTB47	zinc finger and BTB domain containing 47
11730847_a_at	1.31968	6.81552	7.07534	0.0052133	0.166289	BTK	Bruton agammaglobulinemia tyrosine kinase
11718127_at	1.03705	7.57123	7.07508	0.00521387	0.166289	TK1	thymidine kinase 1, soluble
11727996_a_at	-1.61383	7.57833	-7.07489	0.00521427	0.166289	MYEF2	myelin expression factor 2
11718386_at	-1.30247	8.72738	-7.07021	0.00522448	0.166374	ZHX2	zinc fingers and homeoboxes 2
11720514_at	-1.00621	8.12086	-7.06743	0.00523054	0.166374	LURAP1L	leucine rich adaptor protein 1-like
11756709_x_at	1.83168	7.53682	7.06675	0.00523203	0.166374	BTK	Bruton agammaglobulinemia tyrosine kinase
11739563_a_at	-0.992991	8.30906	-7.06584	0.00523403	0.166374	ITPR1	inositol 1,4,5-trisphosphate receptor, type 1
11748288_a_at	-1.48112	8.25812	-7.06448	0.00523699	0.166374	RASL12	RAS-like, family 12
11724806_s_at	1.41486	8.3789	7.06443	0.00523712	0.166374	CIR1	corepressor interacting with RBPJ, 1
11745144_a_at	1.13112	7.82921	7.06043	0.00524588	0.166546	CLEC4E	C-type lectin domain family 4, member E
11720527_at	-2.37329	10.2822	-7.05826	0.00525063	0.16659	LTBP2	latent transforming growth factor beta binding protein 2
11720255_a_at	-1.04384	7.96523	-7.05243	0.00526346	0.16689	SEPT4	septin 4
11736761_at	1.42028	7.78773	7.04916	0.00527067	0.166986	CARD16	caspase recruitment domain family, member 16
11749117_a_at	1.81109	7.50684	7.048	0.00527323	0.166986	CD84	CD84 molecule
11741435_s_at	1.0124	10.6533	7.04399	0.00528209	0.16703	GRB2	growth factor receptor-bound protein 2
11736888_x_at	1.55397	7.26961	7.04311	0.00528406	0.16703	ITGAL	integrin, alpha L (antigen CD11A (p180), lymphocyte function-associated antigen 1; alpha polypeptide)
11717436_a_at	1.36802	7.40728	7.03773	0.00529599	0.16703	CDCA7L	cell division cycle associated 7-like
11732336_at	1.05267	8.46071	7.03734	0.00529686	0.16703	SLC31A1	solute carrier family 31 (copper transporters), member 1
11726459_at	-1.15835	7.72144	-7.03606	0.0052997	0.16703	FAM117B	family with sequence similarity 117, member B
11753509_a_at	-3.56147	9.85819	-7.03596	0.00529992	0.16703	FOXC1	forkhead box C1
11734164_a_at	-2.00594	7.58547	-7.0352	0.00530162	0.16703	ARHGEF26	Rho guanine nucleotide exchange factor (GEF) 26
11746140_a_at	-2.00594	7.58547	-7.0352	0.00530162	0.16703	ARHGEF26	Rho guanine nucleotide exchange factor (GEF) 26
11740302_a_at	1.42772	8.20699	7.03026	0.00531261	0.167176	PARVG	parvin, gamma
11752788_a_at	-0.986941	7.54775	-7.02856	0.0053164	0.167176	VGLL4	vestigial like 4 (Drosophila)
11718924_a_at	-1.18442	10.0069	-7.0283	0.005317	0.167176	WWP2	WW domain containing E3 ubiquitin protein ligase 2
11716129_at	0.987973	10.0667	7.02574	0.0053227	0.167176	IGF2R	insulin-like growth factor 2 receptor
11721625_s_at	1.54154	11.5349	7.02554	0.00532315	0.167176	GLUL	glutamate-ammonia ligase
11723246_s_at	-2.42462	8.0156	-7.02246	0.00533005	0.16727	SFRP1	secreted frizzled-related protein 1
11749201_a_at	-1.34341	8.06234	-7.02118	0.00533291	0.16727	IQCJ-SCHIP1 /// SCHIP1	IQCJ-SCHIP1 readthrough /// schwannomin interacting protein 1
11752974_a_at	1.01629	7.06775	7.01758	0.005341	0.167405	IRF5	interferon regulatory factor 5
11722678_a_at	1.06251	8.3065	7.01486	0.00534711	0.167405	STEAP3	STEAP family member 3, metalloreductase
11748603_a_at	-1.15317	8.19032	-7.01475	0.00534735	0.167405	CDKN1B	cyclin-dependent kinase inhibitor 1B (p27, Kip1)
11752737_a_at	1.65295	8.18131	7.01196	0.00535364	0.167496	CLEC7A	C-type lectin domain family 7, member A
11749751_s_at	0.989011	7.8141	7.00569	0.00536779	0.167658	WIPF1	WAS/WASL interacting protein family, member 1
11717621_a_at	-1.01106	8.82936	-7.00558	0.00536803	0.167658	FOXN3	forkhead box N3
11754819_x_at	0.985348	8.75519	7.00515	0.00536899	0.167658	GBA /// GBAP1	glucosidase, beta, acid /// glucosidase, beta, acid pseudogene 1
11744048_at	-1.58326	8.15733	-6.99625	0.00538918	0.168182	MAP1B	microtubule-associated protein 1B
11746700_s_at	-1.70482	8.22002	-6.99375	0.00539486	0.168233	ITM2A	integral membrane protein 2A
11730732_at	1.07556	9.36033	6.99254	0.00539761	0.168233	DNASE2	deoxyribonuclease II, lysosomal
11732070_at	1.14506	6.69066	6.98988	0.00540367	0.16831	KCNK13	potassium channel, subfamily K, member 13
11721244_a_at	-1.9594	8.52206	-6.98849	0.00540685	0.16831	BGN	biglycan
11756393_x_at	2.20568	8.92798	6.98427	0.00541649	0.168504	CORO1A	coronin, actin binding protein, 1A
11724558_at	1.11041	7.08909	6.98152	0.00542279	0.168594	GNA15	guanine nucleotide binding protein (G protein), alpha 15 (Gq class)
11723711_at	-1.51654	7.84238	-6.97728	0.00543251	0.168734	SLC24A3	solute carrier family 24 (sodium/potassium/calcium exchanger), member 3
11722136_at	-2.10122	8.95673	-6.97583	0.00543584	0.168734	GUCY1A3	guanylate cyclase 1, soluble, alpha 3
11743000_at	2.09998	8.63443	6.97468	0.0054385	0.168734	CD83	CD83 molecule
11728520_a_at	1.51602	6.96175	6.97343	0.00544137	0.168734	PPAPDC1A	phosphatidic acid phosphatase type 2 domain containing 1A
11718364_a_at	-1.03844	8.40151	-6.97214	0.00544434	0.168734	ST6GALNAC6	ST6 (alpha-N-acetyl-neuraminyl-2,3-beta-galactosyl-1,3)-N-acetylgalactosaminide alpha-2,6-sialyltransferase 6
11731635_a_at	-1.08835	8.2746	-6.96579	0.00545898	0.169011	GAB1	GRB2-associated binding protein 1
11717127_a_at	2.38603	9.34211	6.9653	0.00546011	0.169011	ANPEP	alanyl (membrane) aminopeptidase
11746804_x_at	2.92915	9.8037	6.96078	0.00547058	0.169229	HLA-DQB1 /// LOC101060835	major histocompatibility complex, class II, DQ beta 1 /// HLA class II histocompatibility antigen, DQ beta 1 chain-like
11730162_s_at	0.977755	8.12612	6.9575	0.00547817	0.169335	LOC653562 /// SLC6A10P /// SLC6A8	sodium- and chloride-dependent creatine transporter 1-like /// solute carrier family 6 (neurotransmitter transporter, creatine), member 10, pseudogene /// solute carrier family 6 (neurotransmitter transporter, creatine), member 8
11743015_a_at	-0.977376	7.20882	-6.95611	0.00548141	0.169335	DIP2C	DIP2 disco-interacting protein 2 homolog C (Drosophila)
11716374_s_at	-2.59712	9.90568	-6.95487	0.00548428	0.169335	PTK2	protein tyrosine kinase 2
11727633_at	1.73737	7.29809	6.95275	0.00548923	0.169382	SLC16A10	solute carrier family 16, member 10 (aromatic amino acid transporter)
11741041_x_at	1.18369	9.58507	6.93574	0.005529	0.170273	DPP7	dipeptidyl-peptidase 7
11750552_s_at	1.35933	9.50328	6.93477	0.00553129	0.170273	CARD16 /// CASP1	caspase recruitment domain family, member 16 /// caspase 1, apoptosis-related cysteine peptidase
11749520_a_at	-1.52102	8.15881	-6.93187	0.00553811	0.170273	RABGAP1	RAB GTPase activating protein 1
11757492_s_at	-1.7082	8.62393	-6.92874	0.00554548	0.170273	RRAS2	related RAS viral (r-ras) oncogene homolog 2
11746823_a_at	0.989394	9.18094	6.92859	0.00554585	0.170273	RASSF4	Ras association (RalGDS/AF-6) domain family member 4
11751154_x_at	-0.99567	8.25803	-6.92846	0.00554615	0.170273	ALDOC	aldolase C, fructose-bisphosphate
11744003_x_at	-1.01615	10.1329	-6.92818	0.00554681	0.170273	MTHFD2	methylenetetrahydrofolate dehydrogenase (NADP+ dependent) 2, methenyltetrahydrofolate cyclohydrolase
11757407_x_at	-1.5482	8.77993	-6.92727	0.00554896	0.170273	FBLN1	fibulin 1
11717776_at	-1.05413	8.75594	-6.92261	0.00555998	0.170273	KIF1C	kinesin family member 1C
11736544_at	0.980952	6.86524	6.92197	0.00556148	0.170273	MACC1	metastasis associated in colon cancer 1
11754315_x_at	0.984957	13.2453	6.92056	0.00556482	0.170273	TMSB4X	thymosin beta 4, X-linked
11724998_a_at	1.58139	7.53172	6.91989	0.00556642	0.170273	CD86	CD86 molecule
11715692_a_at	-1.27408	11.0381	-6.91977	0.0055667	0.170273	CIRBP	cold inducible RNA binding protein
11722689_a_at	-0.984429	8.56991	-6.91887	0.00556884	0.170273	SPTBN1	spectrin, beta, non-erythrocytic 1
11717171_at	-1.75978	10.1323	-6.91851	0.0055697	0.170273	BCL2L2	BCL2-like 2
11758108_s_at	-2.64651	11.9977	-6.91147	0.00558642	0.170311	EFEMP1	EGF containing fibulin-like extracellular matrix protein 1
11731657_s_at	1.46027	7.70289	6.9099	0.00559016	0.170311	VAV3	vav 3 guanine nucleotide exchange factor
11741261_a_at	-2.95209	8.93798	-6.90879	0.00559281	0.170311	SORBS2	sorbin and SH3 domain containing 2
11755671_a_at	-1.68028	8.5055	-6.90687	0.00559739	0.170311	SYTL2	synaptotagmin-like 2
11732275_at	0.970581	7.75379	6.90649	0.00559829	0.170311	CCL5	chemokine (C-C motif) ligand 5
11726140_s_at	-1.02353	8.46778	-6.90601	0.00559945	0.170311	SIRT1	sirtuin 1
11745226_a_at	-1.04213	7.95922	-6.9046	0.00560283	0.170311	SEPT4	septin 4
11745803_x_at	-3.293	11.2826	-6.90204	0.00560893	0.170311	TPM1	tropomyosin 1 (alpha)
11715532_a_at	0.998511	10.0632	6.89946	0.00561513	0.170311	IFNGR2	interferon gamma receptor 2 (interferon gamma transducer 1)
11717352_a_at	-0.969905	7.72546	-6.89845	0.00561756	0.170311	RPRD1A	regulation of nuclear pre-mRNA domain containing 1A
11750045_x_at	1.01125	9.64444	6.89774	0.00561925	0.170311	TPM3	tropomyosin 3
11725926_s_at	-1.13667	8.6115	-6.8962	0.00562294	0.170311	CLIC4	chloride intracellular channel 4
11718085_s_at	1.37947	8.43908	6.89515	0.00562547	0.170311	LYN	v-yes-1 Yamaguchi sarcoma viral related oncogene homolog
11715787_x_at	1.18623	10.5417	6.89422	0.00562772	0.170311	ATP6V0C	ATPase, H+ transporting, lysosomal 16kDa, V0 subunit c
11758648_s_at	-1.78426	10.094	-6.89341	0.00562964	0.170311	KCTD10	potassium channel tetramerisation domain containing 10
11748005_a_at	-1.49074	7.97937	-6.88928	0.00563959	0.170311	FRY	furry homolog (Drosophila)
11757645_s_at	-3.66313	9.96216	-6.88576	0.00564811	0.170311	FIBIN	fin bud initiation factor homolog (zebrafish)
11743958_at	0.966488	7.64845	6.88404	0.00565226	0.170311	SNX8	sorting nexin 8
11733076_x_at	-1.41956	9.17435	-6.88343	0.00565373	0.170311	PPP1R12A	protein phosphatase 1, regulatory subunit 12A
11725888_at	0.989772	7.21091	6.88206	0.00565705	0.170311	C19orf59	chromosome 19 open reading frame 59
11724981_at	-1.41447	8.053	-6.87838	0.00566597	0.170311	PCDH7	protocadherin 7
11743351_a_at	-1.17351	7.51079	-6.87573	0.0056724	0.170311	COBLL1	cordon-bleu WH2 repeat protein-like 1
11746248_x_at	-1.10327	7.30533	-6.87241	0.00568048	0.170311	MANSC1	MANSC domain containing 1
11729742_x_at	1.00385	8.88729	6.87235	0.00568063	0.170311	IFI27L2	interferon, alpha-inducible protein 27-like 2
11763460_at	1.00929	7.69111	6.87208	0.00568127	0.170311	---	---
11740731_x_at	1.11338	8.01952	6.87039	0.0056854	0.170311	FUOM	fucose mutarotase
11718122_a_at	1.76917	8.23653	6.86919	0.00568833	0.170311	ATP6V1A	ATPase, H+ transporting, lysosomal 70kDa, V1 subunit A
11723722_s_at	-1.09273	9.32615	-6.86867	0.00568959	0.170311	SLAIN2	SLAIN motif family, member 2
11729157_a_at	-3.55348	10.0058	-6.86865	0.00568964	0.170311	MFAP4	microfibrillar-associated protein 4
11745612_a_at	3.89655	9.10458	6.86809	0.00569099	0.170311	TREM2	triggering receptor expressed on myeloid cells 2
11722591_s_at	-1.29979	9.78764	-6.86693	0.00569384	0.170311	BCAP29	B-cell receptor-associated protein 29
11739854_s_at	-1.18521	8.62897	-6.86582	0.00569654	0.170311	LYRM1	LYR motif containing 1
11744893_a_at	1.26165	7.37264	6.86567	0.00569691	0.170311	FAM20A	family with sequence similarity 20, member A
11743375_s_at	-0.99276	8.79552	-6.8642	0.0057005	0.170311	FRYL	FRY-like
11759818_a_at	-0.987492	8.49462	-6.86149	0.00570713	0.170311	DDHD2	DDHD domain containing 2
11722522_a_at	1.23768	7.62397	6.85786	0.00571603	0.170311	SUSD1	sushi domain containing 1
11756541_x_at	1.15027	8.87461	6.85421	0.005725	0.170311	ABHD12	abhydrolase domain containing 12
11741952_x_at	1.29921	6.91363	6.85399	0.00572555	0.170311	PAQR5	progestin and adipoQ receptor family member V
11727871_at	-1.00308	7.4756	-6.85391	0.00572573	0.170311	PPM1K	protein phosphatase, Mg2+/Mn2+ dependent, 1K
11716818_a_at	2.13664	8.70051	6.85386	0.00572587	0.170311	VSIG4	V-set and immunoglobulin domain containing 4
11757621_a_at	-3.6595	10.8474	-6.85273	0.00572864	0.170311	MYLK	myosin light chain kinase
11723071_s_at	-1.37714	9.07405	-6.85237	0.00572954	0.170311	SGCE	sarcoglycan, epsilon
11719666_a_at	1.28833	8.04328	6.85097	0.00573298	0.170311	STMN1	stathmin 1
11727632_at	1.02156	7.55325	6.85054	0.00573403	0.170311	SLC16A10	solute carrier family 16, member 10 (aromatic amino acid transporter)
11723057_x_at	-1.10263	9.53526	-6.85041	0.00573436	0.170311	MRPL33	mitochondrial ribosomal protein L33
11753024_a_at	-1.11901	8.06762	-6.84687	0.00574309	0.170311	NFIB	nuclear factor I/B
11715972_at	-3.66383	10.0454	-6.8465	0.005744	0.170311	SMOC2	SPARC related modular calcium binding 2
11724310_a_at	1.01681	7.55735	6.84487	0.00574804	0.170311	SH3BP2	SH3-domain binding protein 2
11734919_s_at	-0.983446	10.5207	-6.84328	0.00575197	0.170311	TCEA1	transcription elongation factor A (SII), 1
11717913_at	-1.14809	7.71273	-6.84269	0.00575344	0.170311	CDO1	cysteine dioxygenase type 1
11752626_a_at	-0.960566	8.14062	-6.84242	0.0057541	0.170311	PBX1	pre-B-cell leukemia homeobox 1
11732902_x_at	1.05909	6.32829	6.84196	0.00575524	0.170311	APOBEC3B	apolipoprotein B mRNA editing enzyme, catalytic polypeptide-like 3B
11736522_a_at	1.01255	7.43	6.84189	0.00575541	0.170311	TNNT1	troponin T type 1 (skeletal, slow)
11746237_x_at	-0.964566	7.39367	-6.84134	0.00575676	0.170311	AKTIP	AKT interacting protein
11735046_at	1.92286	7.08524	6.83839	0.00576409	0.170426	ATP6V0D2	ATPase, H+ transporting, lysosomal 38kDa, V0 subunit d2
11748920_x_at	1.63619	7.72732	6.83597	0.00577009	0.170462	SLC11A1	solute carrier family 11 (proton-coupled divalent metal ion transporters), member 1
11728191_x_at	1.72409	9.85993	6.83513	0.00577218	0.170462	CXCR4	chemokine (C-X-C motif) receptor 4
11719754_s_at	3.20413	8.38741	6.83368	0.00577578	0.170466	IL1RN	interleukin 1 receptor antagonist
11746942_a_at	-0.960981	8.90935	-6.83115	0.00578209	0.170466	DYNC1LI2	dynein, cytoplasmic 1, light intermediate chain 2
11719537_a_at	-1.17583	8.33778	-6.82861	0.00578841	0.170466	CPXM2	carboxypeptidase X (M14 family), member 2
11751612_a_at	-1.22564	7.30934	-6.82852	0.00578865	0.170466	SOCS2	suppressor of cytokine signaling 2
11757010_x_at	1.60619	8.07326	6.82517	0.005797	0.170466	ACP2	acid phosphatase 2, lysosomal
11718482_at	-0.967948	8.47406	-6.82478	0.00579799	0.170466	UBE2N	ubiquitin-conjugating enzyme E2N
11744426_x_at	1.5147	7.35217	6.8214	0.00580643	0.170466	KIAA0101	KIAA0101
11736204_a_at	-0.974471	10.2581	-6.82088	0.00580773	0.170466	RSU1	Ras suppressor protein 1
11751080_a_at	-0.985316	8.83039	-6.81972	0.00581066	0.170466	C7orf55-LUC7L2 /// LUC7L2	C7orf55-LUC7L2 readthrough /// LUC7-like 2 (S. cerevisiae)
11757409_x_at	1.07175	13.6242	6.8197	0.00581069	0.170466	TMSB10	thymosin beta 10
11719366_s_at	0.960133	7.24466	6.81944	0.00581135	0.170466	CXCL1	chemokine (C-X-C motif) ligand 1 (melanoma growth stimulating activity, alpha)
11756237_a_at	-1.622	8.70161	-6.81744	0.00581637	0.170466	FBLN1	fibulin 1
11731801_at	-1.01816	7.31321	-6.81651	0.00581869	0.170466	C3orf70	chromosome 3 open reading frame 70
11729227_a_at	-2.15382	8.69096	-6.81578	0.00582053	0.170466	GRK5	G protein-coupled receptor kinase 5
11744263_s_at	2.91596	8.87712	6.81131	0.00583179	0.170629	RAC2	ras-related C3 botulinum toxin substrate 2 (rho family, small GTP binding protein Rac2)
11716514_s_at	-1.01556	10.3809	-6.80814	0.00583979	0.170629	ADD1	adducin 1 (alpha)
11752631_a_at	1.17719	6.60783	6.80406	0.0058501	0.170629	SASH3	SAM and SH3 domain containing 3
11734201_s_at	1.41123	7.22206	6.80397	0.00585031	0.170629	GK	glycerol kinase
11728221_at	1.60678	8.18799	6.80357	0.00585134	0.170629	NRIP3	nuclear receptor interacting protein 3
11748526_a_at	0.971437	7.47565	6.80321	0.00585223	0.170629	HVCN1	hydrogen voltage-gated channel 1
11720224_a_at	-1.06122	9.08144	-6.80274	0.00585342	0.170629	TBC1D1	TBC1 (tre-2/USP6, BUB2, cdc16) domain family, member 1
11758936_at	-0.960183	7.74354	-6.80183	0.00585573	0.170629	HNRNPR	heterogeneous nuclear ribonucleoprotein R
11745894_x_at	0.955711	8.02424	6.80128	0.00585713	0.170629	TNFRSF14	tumor necrosis factor receptor superfamily, member 14
11743062_a_at	2.11279	9.62338	6.79653	0.00586918	0.170646	PLAUR	plasminogen activator, urokinase receptor
11723864_s_at	-1.75361	8.38596	-6.79504	0.00587296	0.170646	MTMR11	myotubularin related protein 11
11727523_x_at	0.97386	7.98034	6.79434	0.00587474	0.170646	ZNF267	zinc finger protein 267
11715466_at	1.69458	9.94635	6.79192	0.0058809	0.170646	ARHGDIB	Rho GDP dissociation inhibitor (GDI) beta
11740692_a_at	-0.970806	8.26914	-6.78904	0.00588824	0.170646	VPS13A	vacuolar protein sorting 13 homolog A (S. cerevisiae)
11741227_a_at	-0.983386	8.72397	-6.78723	0.00589287	0.170646	NR3C1	nuclear receptor subfamily 3, group C, member 1 (glucocorticoid receptor)
11732302_a_at	-0.995224	8.47202	-6.7855	0.00589727	0.170646	CREB1	cAMP responsive element binding protein 1
11719829_a_at	0.992377	8.0906	6.78489	0.00589883	0.170646	SLC26A11	solute carrier family 26, member 11
11728003_a_at	1.44174	8.38467	6.78344	0.00590254	0.170646	C4orf48	chromosome 4 open reading frame 48
11743497_at	-1.13142	7.45059	-6.7826	0.00590471	0.170646	BMP2	bone morphogenetic protein 2
11726464_a_at	0.985547	8.5621	6.78206	0.00590607	0.170646	IGFLR1	IGF-like family receptor 1
11736766_at	-0.951848	7.5127	-6.78041	0.00591031	0.170646	C14orf28	chromosome 14 open reading frame 28
11752575_a_at	-1.151	7.49766	-6.77869	0.00591473	0.170646	SYNC	syncoilin, intermediate filament protein
11722826_a_at	1.08008	6.61787	6.77841	0.00591545	0.170646	NCAPG	non-SMC condensin I complex, subunit G
11715736_s_at	-1.34546	8.93986	-6.77664	0.00592	0.170646	CASC3	cancer susceptibility candidate 3
11720301_a_at	1.38952	7.5135	6.77623	0.00592104	0.170646	SLA	Src-like-adaptor
11724463_a_at	3.306	12.03	6.77395	0.0059269	0.170646	GPNMB	glycoprotein (transmembrane) nmb
11721663_a_at	-0.977422	7.2416	-6.77202	0.00593186	0.170646	HDAC11	histone deacetylase 11
11723534_at	-0.952407	8.4659	-6.77078	0.00593508	0.170646	BRMS1L	breast cancer metastasis-suppressor 1-like
11723884_at	-0.965057	8.05664	-6.76939	0.00593865	0.170646	SOWAHC	sosondowah ankyrin repeat domain family member C
11744468_at	-1.65811	9.26397	-6.76929	0.0059389	0.170646	SYNCRIP	synaptotagmin binding, cytoplasmic RNA interacting protein
11736856_at	-0.950507	7.64813	-6.76915	0.00593927	0.170646	RASL11A	RAS-like, family 11, member A
11730219_s_at	-1.0101	7.99579	-6.76799	0.00594227	0.170646	SPG20	spastic paraplegia 20 (Troyer syndrome)
11723537_a_at	1.13847	8.38539	6.7648	0.00595051	0.170646	HMHA1	histocompatibility (minor) HA-1
11758075_s_at	1.28446	8.23971	6.76427	0.00595187	0.170646	SLC18B1	solute carrier family 18, subfamily B, member 1
11753961_a_at	1.05531	8.62348	6.76289	0.00595544	0.170646	IGF2R	insulin-like growth factor 2 receptor
11733755_at	1.29125	7.08368	6.75955	0.0059641	0.170646	PKD2L1	polycystic kidney disease 2-like 1
11718760_a_at	-0.952828	7.99546	-6.75908	0.00596533	0.170646	WLS	wntless homolog (Drosophila)
11722269_a_at	1.59377	7.26175	6.75565	0.00597425	0.170646	SASH3	SAM and SH3 domain containing 3
11745488_s_at	1.4018	7.12022	6.75555	0.0059745	0.170646	LILRA6 /// LILRB3	leukocyte immunoglobulin-like receptor, subfamily A (with TM domain), member 6 /// leukocyte immunoglobulin-like receptor, subfamily B (with TM and ITIM domains), member 3
11754445_a_at	-1.09719	8.83721	-6.75552	0.00597459	0.170646	C12orf29	chromosome 12 open reading frame 29
11755966_x_at	1.00415	12.8825	6.75415	0.00597815	0.170646	HLA-B	major histocompatibility complex, class I, B
11740362_a_at	-0.969483	9.79691	-6.75165	0.00598465	0.170646	FOXN3	forkhead box N3
11725684_a_at	1.54001	7.56966	6.75112	0.00598602	0.170646	PTPRO	protein tyrosine phosphatase, receptor type, O
11722280_at	-1.24585	9.42114	-6.75048	0.0059877	0.170646	PHC3	polyhomeotic homolog 3 (Drosophila)
11728220_at	0.991174	6.78166	6.7503	0.00598817	0.170646	NRIP3	nuclear receptor interacting protein 3
11720005_at	-1.00869	7.17439	-6.74973	0.00598965	0.170646	NPTX2	neuronal pentraxin II
11750762_a_at	-0.947543	8.12372	-6.74858	0.00599265	0.170646	DHX40	DEAH (Asp-Glu-Ala-His) box polypeptide 40
11716325_a_at	-0.948464	9.16028	-6.74552	0.00600065	0.170646	CLK1	CDC-like kinase 1
11757308_s_at	-1.36262	11.7806	-6.74504	0.00600189	0.170646	PPP1CB	protein phosphatase 1, catalytic subunit, beta isozyme
11730603_a_at	-1.11457	8.05162	-6.74489	0.0060023	0.170646	FAM13C	family with sequence similarity 13, member C
11756522_a_at	1.04474	8.09516	6.74371	0.00600538	0.170646	SCARB1	scavenger receptor class B, member 1
11742425_a_at	-0.946949	8.71497	-6.74349	0.00600595	0.170646	NR3C1	nuclear receptor subfamily 3, group C, member 1 (glucocorticoid receptor)
11722823_a_at	-1.03459	8.74762	-6.73824	0.00601971	0.170938	SKP1	S-phase kinase-associated protein 1
11721608_s_at	-1.01485	9.533	-6.73606	0.00602546	0.171004	RAPGEF2	Rap guanine nucleotide exchange factor (GEF) 2
11721702_a_at	1.19077	8.33398	6.73264	0.00603446	0.171161	CMTM7	CKLF-like MARVEL transmembrane domain containing 7
11727019_at	-1.27398	8.04435	-6.72898	0.00604412	0.171337	ABI2	abl-interactor 2
11739725_a_at	-2.08945	7.59763	-6.72287	0.00606026	0.171549	TC2N	tandem C2 domains, nuclear
11715683_a_at	-1.32216	7.38668	-6.72239	0.00606153	0.171549	KRT7	keratin 7
11763422_a_at	1.1442	9.19608	6.72066	0.00606612	0.171549	ATP6V0D1	ATPase, H+ transporting, lysosomal 38kDa, V0 subunit d1
11763324_a_at	-0.946498	7.91607	-6.7185	0.00607185	0.171549	VAMP4	vesicle-associated membrane protein 4
11753705_x_at	1.30818	8.04838	6.71767	0.00607405	0.171549	STMN1	stathmin 1
11744355_a_at	-0.951008	9.82029	-6.71724	0.00607519	0.171549	SUN2	Sad1 and UNC84 domain containing 2
11743858_at	-2.21697	8.40552	-6.71116	0.00609138	0.171549	IL33	interleukin 33
11743859_x_at	-2.21697	8.52369	-6.71116	0.00609138	0.171549	IL33	interleukin 33
11730987_at	-0.946345	6.5286	-6.70964	0.00609544	0.171549	SBSPON	somatomedin B and thrombospondin, type 1 domain containing
11719167_a_at	-1.01814	10.9439	-6.70877	0.00609776	0.171549	TACC1	transforming, acidic coiled-coil containing protein 1
11747534_a_at	-0.946306	10.2518	-6.70406	0.00611035	0.171549	RSU1	Ras suppressor protein 1
11759402_s_at	-1.28704	10.3609	-6.70311	0.00611289	0.171549	VCAN	versican
11745988_a_at	1.05929	8.24255	6.70268	0.00611405	0.171549	ADPGK	ADP-dependent glucokinase
11716036_x_at	1.32496	9.47943	6.70009	0.00612099	0.171549	BST2	bone marrow stromal cell antigen 2
11758105_s_at	-1.10452	9.62442	-6.69969	0.00612206	0.171549	CREBBP	CREB binding protein
11738185_s_at	-1.26607	7.84757	-6.69852	0.00612522	0.171549	PDE8B	phosphodiesterase 8B
11717756_s_at	1.19524	9.55815	6.69824	0.00612596	0.171549	RALA	v-ral simian leukemia viral oncogene homolog A (ras related)
11748423_a_at	-0.97071	8.93032	-6.69663	0.0061303	0.171549	PGM1	phosphoglucomutase 1
11734722_at	-1.59647	8.58956	-6.69601	0.00613196	0.171549	EDIL3	EGF-like repeats and discoidin I-like domains 3
11752577_at	1.73462	11.0138	6.69442	0.00613625	0.171549	FTH1	ferritin, heavy polypeptide 1
11717109_s_at	-1.08161	7.61907	-6.69427	0.00613665	0.171549	PCM1	pericentriolar material 1
11753995_x_at	-1.23639	8.18944	-6.69387	0.00613771	0.171549	SNCG	synuclein, gamma (breast cancer-specific protein 1)
11732901_a_at	1.02809	6.40182	6.69196	0.00614285	0.171549	APOBEC3A /// APOBEC3A_B /// APOBEC3B	apolipoprotein B mRNA editing enzyme, catalytic polypeptide-like 3A /// APOBEC3A and APOBEC3B deletion hybrid /// apolipoprotein B mRNA editing enzyme, catalytic polypeptide-like 3B
11722671_at	-1.07668	9.2709	-6.69189	0.00614306	0.171549	AKAP11	A kinase (PRKA) anchor protein 11
11728652_x_at	-1.2697	8.7808	-6.68956	0.00614934	0.171549	ZRANB2	zinc finger, RAN-binding domain containing 2
11742685_a_at	1.26914	8.53535	6.68873	0.00615159	0.171549	LAMP2	lysosomal-associated membrane protein 2
11731099_a_at	1.20752	8.51578	6.68771	0.00615433	0.171549	DNPH1	2'-deoxynucleoside 5'-phosphate N-hydrolase 1
11718515_a_at	0.938937	10.1737	6.68725	0.00615557	0.171549	SQRDL	sulfide quinone reductase-like (yeast)
11725358_a_at	-1.71103	8.42895	-6.68691	0.00615649	0.171549	ACAN	aggrecan
11753939_x_at	0.938935	9.19463	6.68609	0.00615872	0.171549	PSMB10	proteasome (prosome, macropain) subunit, beta type, 10
11743169_a_at	2.13747	8.25341	6.68527	0.00616094	0.171549	LPXN	leupaxin
11726288_a_at	-0.956693	7.89372	-6.68329	0.00616631	0.171549	GRAMD3	GRAM domain containing 3
11757466_s_at	-1.37438	8.84558	-6.682	0.00616978	0.171549	FAM177A1	family with sequence similarity 177, member A1
11755289_x_at	-1.1091	10.5324	-6.68118	0.00617203	0.171549	MORF4L2	mortality factor 4 like 2
11756152_s_at	-0.96782	10.6787	-6.67917	0.00617746	0.171549	PCNP	PEST proteolytic signal containing nuclear protein
11748492_a_at	-1.1197	7.88465	-6.67898	0.006178	0.171549	LAYN	layilin
11727015_s_at	-0.942741	7.16694	-6.67829	0.00617987	0.171549	PAPPA	pregnancy-associated plasma protein A, pappalysin 1
11727572_s_at	1.4936	7.03093	6.67494	0.00618899	0.171562	KLHL6	kelch-like family member 6
11747276_a_at	-1.80508	9.36899	-6.67325	0.00619357	0.171562	AKAP1	A kinase (PRKA) anchor protein 1
11758506_s_at	1.12981	9.97654	6.67287	0.00619463	0.171562	RNF13	ring finger protein 13
11736111_a_at	1.12097	8.2099	6.6711	0.00619944	0.171562	ARHGAP18	Rho GTPase activating protein 18
11737769_a_at	-1.01334	9.18586	-6.6708	0.00620027	0.171562	MYO1C	myosin IC
11726637_at	-1.00227	8.15003	-6.67049	0.0062011	0.171562	MIB1	mindbomb E3 ubiquitin protein ligase 1
11726353_at	1.31679	7.50803	6.66585	0.0062138	0.171776	CD180	CD180 molecule
11752557_a_at	-1.04893	8.3246	-6.66425	0.00621818	0.171776	CREBRF	CREB3 regulatory factor
11737127_a_at	-1.79528	7.92204	-6.66385	0.00621926	0.171776	ITGA1	integrin, alpha 1
11753027_a_at	1.48524	8.17038	6.66051	0.00622843	0.171933	PLEKHB2	pleckstrin homology domain containing, family B (evectins) member 2
11739989_a_at	1.09374	8.40139	6.65666	0.006239	0.172129	CPPED1	calcineurin-like phosphoesterase domain containing 1
11747282_x_at	0.941543	13.1355	6.65452	0.00624489	0.172135	ANXA2 /// ANXA2P2	annexin A2 /// annexin A2 pseudogene 2
11721032_s_at	-1.02081	8.62833	-6.65181	0.00625237	0.172135	FAM107A /// LOC101059937	family with sequence similarity 107, member A /// uncharacterized LOC101059937
11738835_x_at	-0.962205	8.86172	-6.6517	0.00625268	0.172135	NDRG2	NDRG family member 2
11753893_a_at	-2.52538	9.92156	-6.65153	0.00625314	0.172135	PRELP	proline/arginine-rich end leucine-rich repeat protein
11730730_s_at	-1.82186	11.0454	-6.64944	0.00625891	0.172198	PTRF	polymerase I and transcript release factor
11749789_a_at	0.940317	7.86698	6.648	0.00626289	0.172212	TP53I3	tumor protein p53 inducible protein 3
11758479_s_at	-1.38728	7.41434	-6.6467	0.00626649	0.172215	ANGPTL1	angiopoietin-like 1
11739308_s_at	-0.9406	8.28762	-6.64272	0.00627752	0.172375	DLG1	discs, large homolog 1 (Drosophila)
11739501_a_at	-1.04665	7.50068	-6.64037	0.00628404	0.172375	DSP	desmoplakin
11720713_a_at	1.46977	8.40429	6.63963	0.00628609	0.172375	KCNE3	potassium voltage-gated channel, Isk-related family, member 3
11727160_at	-1.07884	10.1255	-6.63958	0.00628623	0.172375	NFIX	nuclear factor I/X (CCAAT-binding transcription factor)
11753802_a_at	-0.933091	9.91412	-6.63614	0.0062958	0.172542	SRSF5	serine/arginine-rich splicing factor 5
11716728_s_at	-3.18599	11.5407	-6.62935	0.00631473	0.172965	TPM1	tropomyosin 1 (alpha)
11743733_s_at	-1.22283	9.6466	-6.6263	0.00632326	0.172979	RCAN1	regulator of calcineurin 1
11755400_s_at	-1.20402	7.93884	-6.62347	0.0063312	0.172979	STK39	serine threonine kinase 39
11715293_s_at	1.02145	6.52052	6.62334	0.00633157	0.172979	TRPT1	tRNA phosphotransferase 1
11726726_s_at	1.56201	8.43969	6.62275	0.00633323	0.172979	NABP1	nucleic acid binding protein 1
11755933_x_at	0.934401	12.8484	6.62084	0.00633859	0.172979	HLA-B	major histocompatibility complex, class I, B
11723110_at	1.34197	9.55903	6.61985	0.00634137	0.172979	PLEKHB2	pleckstrin homology domain containing, family B (evectins) member 2
11760037_a_at	-1.01363	9.5389	-6.61873	0.0063445	0.172979	GLS	glutaminase
11757411_x_at	-1.17077	10.0693	-6.61709	0.00634912	0.172979	MRPL33	mitochondrial ribosomal protein L33
11740393_at	1.3457	7.06233	6.6149	0.0063553	0.172979	TNFRSF9	tumor necrosis factor receptor superfamily, member 9
11755396_a_at	1.38928	8.0527	6.61356	0.00635906	0.172979	PLA2G15	phospholipase A2, group XV
11753966_a_at	-0.938382	6.97898	-6.61291	0.0063609	0.172979	ZNF204P	zinc finger protein 204, pseudogene
11745127_x_at	0.986678	6.74882	6.6126	0.00636178	0.172979	TNNT1	troponin T type 1 (skeletal, slow)
11720672_a_at	-1.11662	9.19863	-6.61239	0.00636237	0.172979	PPM1A	protein phosphatase, Mg2+/Mn2+ dependent, 1A
11758717_x_at	-0.929542	11.8231	-6.61138	0.00636524	0.172979	NDUFA4	NADH dehydrogenase (ubiquinone) 1 alpha subcomplex, 4, 9kDa
11721433_a_at	-0.942306	8.48051	-6.61052	0.00636766	0.172979	CRBN	cereblon
11718770_a_at	-0.980387	10.5162	-6.60456	0.00638453	0.173318	SELK	selenoprotein K
11759895_at	-0.948735	7.13325	-6.60364	0.00638715	0.173318	PCDH9	protocadherin 9
11763186_at	0.938873	7.23846	6.60164	0.00639281	0.173342	CASP1	caspase 1, apoptosis-related cysteine peptidase
11744707_a_at	-1.76861	7.48396	-6.60086	0.00639503	0.173342	ANGPTL1	angiopoietin-like 1
11758859_at	-1.27805	10.2601	-6.59444	0.0064133	0.173658	RAB2A	RAB2A, member RAS oncogene family
11753199_x_at	-0.958247	8.48421	-6.59346	0.0064161	0.173658	SMARCA2	SWI/SNF related, matrix associated, actin dependent regulator of chromatin, subfamily a, member 2
11728901_a_at	1.11183	7.3912	6.5912	0.00642256	0.173658	DAPP1	dual adaptor of phosphotyrosine and 3-phosphoinositides
11755581_a_at	-2.09323	10.2617	-6.59112	0.00642277	0.173658	LATS2	large tumor suppressor kinase 2
11749473_a_at	-1.25498	8.97968	-6.59061	0.00642424	0.173658	MEF2D	myocyte enhancer factor 2D
11718675_s_at	-0.958189	9.31825	-6.58914	0.00642844	0.173675	TMEM245	transmembrane protein 245
11749897_x_at	-1.66245	8.77878	-6.5871	0.00643428	0.173675	FMOD	fibromodulin
11746599_a_at	1.2951	6.83921	6.58565	0.00643843	0.173675	NRIP3	nuclear receptor interacting protein 3
11739812_a_at	-1.04017	8.64624	-6.58549	0.0064389	0.173675	HDGFRP3	hepatoma-derived growth factor, related protein 3
11744789_a_at	1.09324	6.96123	6.58427	0.0064424	0.173675	MLF1IP	MLF1 interacting protein
11722399_a_at	-1.11049	8.40132	-6.58148	0.0064504	0.173778	DAPK3 /// MIR637	death-associated protein kinase 3 /// microRNA 637
11721430_a_at	-1.06089	8.10841	-6.58049	0.00645326	0.173778	SYBU	syntabulin (syntaxin-interacting)
11739753_at	1.47164	8.29282	6.57596	0.00646628	0.174002	SLAMF8	SLAM family member 8
11721604_a_at	-2.58704	8.60835	-6.57403	0.00647185	0.174002	SYNPO2	synaptopodin 2
11724678_a_at	1.9079	8.01084	6.57395	0.0064721	0.174002	LY86	lymphocyte antigen 86
11716441_at	-0.966671	8.60126	-6.57071	0.00648144	0.174144	USO1	USO1 vesicle transport factor
11736169_a_at	-1.14475	9.02696	-6.56943	0.00648516	0.174144	NDEL1	nudE nuclear distribution E homolog (A. nidulans)-like 1
11746137_a_at	-0.941896	9.86933	-6.56846	0.00648795	0.174144	SRSF5	serine/arginine-rich splicing factor 5
11754241_a_at	-0.948878	8.44895	-6.56323	0.00650312	0.174313	ATAD1	ATPase family, AAA domain containing 1
11757808_s_at	-1.48131	9.25846	-6.56296	0.0065039	0.174313	RERE	arginine-glutamic acid dipeptide (RE) repeats
11748629_a_at	-1.35843	9.06507	-6.56233	0.00650575	0.174313	IFRD1	interferon-related developmental regulator 1
11759496_at	0.943209	7.63985	6.56143	0.00650836	0.174313	CHST11	carbohydrate (chondroitin 4) sulfotransferase 11
11724716_a_at	-1.18357	7.88349	-6.55966	0.0065135	0.174357	BCOR	BCL6 corepressor
11741981_x_at	0.978076	7.16413	6.55413	0.00652961	0.174605	CLEC7A	C-type lectin domain family 7, member A
11735702_x_at	-1.17219	10.6687	-6.55393	0.0065302	0.174605	CD151	CD151 molecule (Raph blood group)
11724447_a_at	-1.28514	7.25869	-6.55286	0.00653334	0.174605	PDE4D	phosphodiesterase 4D, cAMP-specific
11723638_at	-1.00953	8.96212	-6.55027	0.00654092	0.174713	C11orf58	chromosome 11 open reading frame 58
11741807_a_at	-1.03259	9.28326	-6.54594	0.00655359	0.174931	CMPK1	cytidine monophosphate (UMP-CMP) kinase 1, cytosolic
11756403_s_at	-2.39005	10.6838	-6.54507	0.00655616	0.174931	KCTD10	potassium channel tetramerisation domain containing 10
11755533_a_at	-1.05895	7.32115	-6.54028	0.00657022	0.174978	GPR125	G protein-coupled receptor 125
11717218_a_at	1.23745	8.263	6.5401	0.00657077	0.174978	STK10	serine/threonine kinase 10
11727923_at	-1.15997	9.65472	-6.53901	0.00657396	0.174978	PURA	purine-rich element binding protein A
11721184_at	0.994964	8.33906	6.53872	0.00657481	0.174978	TSPAN33	tetraspanin 33
11728189_a_at	1.68767	9.76404	6.53779	0.00657756	0.174978	CXCR4	chemokine (C-X-C motif) receptor 4
11727345_s_at	-2.11307	9.69132	-6.53708	0.00657965	0.174978	FBLN1	fibulin 1
11754571_a_at	-1.1421	9.226	-6.5339	0.00658905	0.174978	GMDS	GDP-mannose 4,6-dehydratase
11744617_a_at	-1.00247	7.74745	-6.53359	0.00658995	0.174978	RPRD1A	regulation of nuclear pre-mRNA domain containing 1A
11721717_s_at	-1.02035	9.58321	-6.53318	0.00659118	0.174978	ATRX	alpha thalassemia/mental retardation syndrome X-linked
11755019_s_at	-1.20881	8.52624	-6.53153	0.00659604	0.174978	SCUBE3	signal peptide, CUB domain, EGF-like 3
11754483_a_at	-1.7205	9.98766	-6.52973	0.00660139	0.174978	PXDC1	PX domain containing 1
11729379_s_at	-0.982149	8.05381	-6.52782	0.00660705	0.174978	CASK	calcium/calmodulin-dependent serine protein kinase (MAGUK family)
11716497_at	-0.928878	10.9235	-6.52775	0.00660723	0.174978	CHMP4B	charged multivesicular body protein 4B
11724799_x_at	2.93434	9.41861	6.52745	0.00660813	0.174978	HLA-DQA1 /// LOC100509457	major histocompatibility complex, class II, DQ alpha 1 /// HLA class II histocompatibility antigen, DQ alpha 1 chain-like
11726682_a_at	-0.928598	7.00308	-6.52464	0.00661647	0.174978	MEIS1	Meis homeobox 1
11724173_at	0.980009	7.59992	6.52411	0.00661806	0.174978	SDSL	serine dehydratase-like
11758344_s_at	1.14405	10.6387	6.52284	0.00662183	0.174978	SDCBP	syndecan binding protein (syntenin)
11755343_s_at	-1.31115	8.33583	-6.52272	0.00662218	0.174978	SETMAR	SET domain and mariner transposase fusion gene
11763246_x_at	2.41134	9.77213	6.51994	0.00663046	0.174978	HLA-DQB1	major histocompatibility complex, class II, DQ beta 1
11758970_a_at	-1.11396	7.44221	-6.51952	0.0066317	0.174978	PVRL3	poliovirus receptor-related 3
11728884_a_at	1.38664	8.10589	6.51855	0.00663458	0.174978	TM6SF1	transmembrane 6 superfamily member 1
11715644_s_at	0.977346	12.2492	6.51513	0.0066448	0.174978	ATP6AP2	ATPase, H+ transporting, lysosomal accessory protein 2
11754125_x_at	1.22634	7.97076	6.51361	0.00664936	0.174978	COTL1	coactosin-like 1 (Dictyostelium)
11715827_s_at	0.937674	10.1288	6.51219	0.0066536	0.174978	M6PR	mannose-6-phosphate receptor (cation dependent)
11757415_s_at	-0.919501	9.8023	-6.51139	0.00665599	0.174978	SLC5A3	solute carrier family 5 (sodium/myo-inositol cotransporter), member 3
11720204_at	-1.12534	8.1675	-6.51015	0.00665971	0.174978	NT5DC1	5'-nucleotidase domain containing 1
11721143_a_at	0.96272	7.26192	6.50911	0.00666281	0.174978	MKI67	antigen identified by monoclonal antibody Ki-67
11732418_at	0.94302	6.93813	6.50736	0.00666806	0.174978	FAM105A	family with sequence similarity 105, member A
11754095_a_at	-4.57651	12.3898	-6.5065	0.00667065	0.174978	TAGLN	transgelin
11757552_x_at	0.918177	11.5374	6.50635	0.0066711	0.174978	ARPC3	actin related protein 2/3 complex, subunit 3, 21kDa
11755027_a_at	-2.56342	10.2379	-6.50479	0.00667577	0.174978	TGFB1I1	transforming growth factor beta 1 induced transcript 1
11758446_s_at	-1.62972	9.58345	-6.50201	0.00668414	0.174978	TSC22D1	TSC22 domain family, member 1
11744194_a_at	0.934392	7.45563	6.5014	0.00668598	0.174978	ABCC3	ATP-binding cassette, sub-family C (CFTR/MRP), member 3
11717935_a_at	1.18042	8.29684	6.50071	0.00668806	0.174978	ERMP1	endoplasmic reticulum metallopeptidase 1
11725537_at	-1.18737	6.85762	-6.49921	0.00669258	0.174978	ZNRF3	zinc and ring finger 3
11754245_x_at	1.03314	10.7389	6.49854	0.00669458	0.174978	SDCBP	syndecan binding protein (syntenin)
11734938_x_at	1.0824	7.01984	6.49715	0.00669878	0.174978	CSF2RA	colony stimulating factor 2 receptor, alpha, low-affinity (granulocyte-macrophage)
11718915_a_at	1.44942	8.73078	6.49662	0.00670038	0.174978	RGS19	regulator of G-protein signaling 19
11721422_s_at	-0.944285	7.92605	-6.49495	0.00670544	0.174978	SPAG16	sperm associated antigen 16
11718297_a_at	0.984986	7.43396	6.49221	0.00671372	0.174978	TACC3	transforming, acidic coiled-coil containing protein 3
11722645_s_at	-1.27493	8.53825	-6.4921	0.00671406	0.174978	ZNHIT6	zinc finger, HIT-type containing 6
11735722_a_at	1.21057	7.41326	6.49092	0.00671762	0.174978	PNKD	paroxysmal nonkinesigenic dyskinesia
11731755_a_at	-2.19847	8.96079	-6.48855	0.00672481	0.174978	SYTL2	synaptotagmin-like 2
11715512_s_at	-1.1553	9.41448	-6.4876	0.00672769	0.174978	NDFIP1	Nedd4 family interacting protein 1
11718676_x_at	-0.912959	9.86677	-6.4852	0.00673499	0.174978	TMEM245	transmembrane protein 245
11742733_x_at	-0.911884	11.9855	-6.4836	0.00673985	0.174978	MORF4L1	mortality factor 4 like 1
11724573_at	-0.926955	7.60694	-6.4832	0.00674107	0.174978	APPBP2	amyloid beta precursor protein (cytoplasmic tail) binding protein 2
11743917_a_at	-1.14013	8.77067	-6.48242	0.00674344	0.174978	FKBP5	FK506 binding protein 5
11728456_s_at	-0.961381	8.43997	-6.48194	0.0067449	0.174978	RAB33B	RAB33B, member RAS oncogene family
11717762_a_at	2.45937	8.52443	6.48188	0.0067451	0.174978	CPVL	carboxypeptidase, vitellogenic-like
11754385_s_at	-1.7289	10.0566	-6.47959	0.00675207	0.174978	WASL	Wiskott-Aldrich syndrome-like
11749377_a_at	1.03841	7.05817	6.47924	0.00675313	0.174978	CECR1	cat eye syndrome chromosome region, candidate 1
11716439_s_at	-1.14938	10.109	-6.47902	0.00675381	0.174978	TAF7	TAF7 RNA polymerase II, TATA box binding protein (TBP)-associated factor, 55kDa
11739152_a_at	1.31618	8.59615	6.47863	0.00675501	0.174978	TTYH3	tweety homolog 3 (Drosophila)
11757052_x_at	1.00064	9.20839	6.47686	0.0067604	0.174978	TWF2	twinfilin actin-binding protein 2
11722472_a_at	-1.08547	7.67985	-6.4763	0.00676213	0.174978	PEG3	paternally expressed 3
11733403_x_at	1.62133	8.16866	6.47517	0.00676557	0.174978	CLEC7A	C-type lectin domain family 7, member A
11747714_a_at	-0.957927	7.09372	-6.47409	0.00676887	0.174978	ABCA8	ATP-binding cassette, sub-family A (ABC1), member 8
11726487_at	-2.01362	8.23875	-6.47385	0.00676961	0.174978	CPED1	cadherin-like and PC-esterase domain containing 1
11724470_s_at	1.03528	7.34223	6.47266	0.00677326	0.174978	MGST1	microsomal glutathione S-transferase 1
11726473_a_at	1.03174	7.75526	6.47256	0.00677357	0.174978	DOK3	docking protein 3
11727587_x_at	0.909896	7.40839	6.47027	0.00678059	0.175068	HAGHL	hydroxyacylglutathione hydrolase-like
11746264_a_at	-2.95638	9.42578	-6.46744	0.00678927	0.175201	PPAP2A	phosphatidic acid phosphatase type 2A
11721000_at	-1.13095	8.35153	-6.46622	0.00679302	0.175206	HEXIM1	hexamethylene bis-acetamide inducible 1
11719089_a_at	1.06002	8.00408	6.46385	0.0068003	0.17525	PCK2	phosphoenolpyruvate carboxykinase 2 (mitochondrial)
11731932_a_at	-1.48293	7.71129	-6.4619	0.00680633	0.17525	KANK1	KN motif and ankyrin repeat domains 1
11746575_a_at	-1.51012	9.13656	-6.46094	0.00680927	0.17525	LTBP3	latent transforming growth factor beta binding protein 3
11752844_x_at	-1.52217	7.88049	-6.46046	0.00681075	0.17525	PTGER3	prostaglandin E receptor 3 (subtype EP3)
11749066_s_at	-1.8051	9.85534	-6.45992	0.00681242	0.17525	BGN	biglycan
11736207_a_at	0.906267	6.73777	6.4542	0.00683009	0.175613	PLXNC1	plexin C1
11726809_x_at	1.56054	7.67217	6.45248	0.00683542	0.175656	SLC12A8	solute carrier family 12 (potassium/chloride transporters), member 8
11729905_a_at	-0.937508	7.2655	-6.45081	0.00684061	0.175656	LRCH2	leucine-rich repeats and calponin homology (CH) domain containing 2
11741499_x_at	1.44199	7.10993	6.44994	0.0068433	0.175656	HPGD	hydroxyprostaglandin dehydrogenase 15-(NAD)
11746667_a_at	-0.922773	7.58588	-6.44909	0.00684596	0.175656	BHMT2	betaine--homocysteine S-methyltransferase 2
11729140_x_at	1.24335	7.39038	6.44308	0.00686466	0.175923	SLAMF7	SLAM family member 7
11719853_s_at	-1.40942	9.92309	-6.44109	0.00687085	0.175923	SEPT10	septin 10
11740961_a_at	1.53306	8.06382	6.44096	0.00687126	0.175923	CD33	CD33 molecule
11739025_a_at	-0.970181	9.12867	-6.43873	0.00687823	0.175923	HMGB1	high mobility group box 1
11727841_a_at	1.08442	8.39858	6.43521	0.00688923	0.175923	PRKCD	protein kinase C, delta
11732561_a_at	-0.937712	7.20796	-6.43378	0.00689372	0.175923	FZD3	frizzled family receptor 3
11755548_a_at	1.00076	8.00186	6.43366	0.00689409	0.175923	OSBPL8	oxysterol binding protein-like 8
11748091_a_at	-1.42387	8.77294	-6.43304	0.00689602	0.175923	EPS8	epidermal growth factor receptor pathway substrate 8
11743343_at	-0.903276	8.25403	-6.43226	0.00689847	0.175923	RMND5A	required for meiotic nuclear division 5 homolog A (S. cerevisiae)
11722818_a_at	0.960908	7.46554	6.43216	0.00689878	0.175923	GGH	gamma-glutamyl hydrolase (conjugase, folylpolygammaglutamyl hydrolase)
11716331_a_at	-1.12535	9.64353	-6.43209	0.00689899	0.175923	DNAJB6	DnaJ (Hsp40) homolog, subfamily B, member 6
11747937_a_at	-1.12535	9.64353	-6.43209	0.00689899	0.175923	DNAJB6	DnaJ (Hsp40) homolog, subfamily B, member 6
11744132_at	-1.00985	7.73975	-6.42737	0.00691384	0.176201	SECISBP2L	SECIS binding protein 2-like
11744373_s_at	-0.988074	9.95698	-6.42597	0.00691824	0.176201	GYG1	glycogenin 1
11759613_a_at	-0.984426	7.90178	-6.42522	0.00692059	0.176201	KIAA1704 /// LOC100996395	KIAA1704 /// uncharacterized LOC100996395
11754851_x_at	-1.05613	8.84098	-6.42394	0.00692464	0.176213	LIMS2	LIM and senescent cell antigen-like domains 2
11746574_x_at	-1.19787	8.63741	-6.41956	0.00693845	0.176474	RHOB	ras homolog family member B
11754960_a_at	-1.24351	7.55134	-6.41532	0.00695188	0.17672	PRRT2	proline-rich transmembrane protein 2
11730770_at	-1.02464	8.63448	-6.41376	0.00695682	0.17672	NAPG	N-ethylmaleimide-sensitive factor attachment protein, gamma
11719824_at	-2.6628	9.80082	-6.41012	0.00696837	0.17672	ZAK	sterile alpha motif and leucine zipper containing kinase AZK
11743374_a_at	-0.949936	9.12793	-6.40992	0.00696902	0.17672	FRYL	FRY-like
11721368_at	-1.87013	9.35755	-6.40979	0.00696942	0.17672	CRLF1	cytokine receptor-like factor 1
11750553_x_at	0.960908	8.03349	6.40935	0.00697082	0.17672	CASP1	caspase 1, apoptosis-related cysteine peptidase
11720316_s_at	-1.36513	8.99574	-6.40712	0.00697791	0.17672	SLC44A2	solute carrier family 44, member 2
11747832_s_at	-1.36593	8.62297	-6.40671	0.00697922	0.17672	FBXO21	F-box protein 21
11740974_a_at	0.901227	10.0984	6.40639	0.00698024	0.17672	CYFIP1	cytoplasmic FMR1 interacting protein 1
11718076_at	1.08089	7.90921	6.40168	0.00699526	0.176877	MAPKAPK3	mitogen-activated protein kinase-activated protein kinase 3
11722914_s_at	-1.51927	7.86063	-6.39895	0.00700401	0.176877	BMPR1A	bone morphogenetic protein receptor, type IA
11739200_x_at	-0.94461	9.30736	-6.39828	0.00700613	0.176877	TMEM106C	transmembrane protein 106C
11763717_a_at	-0.998661	8.5191	-6.39813	0.00700663	0.176877	CDKN1C	cyclin-dependent kinase inhibitor 1C (p57, Kip2)
11744869_a_at	1.16349	8.8688	6.39759	0.00700834	0.176877	B3GNT2	UDP-GlcNAc:betaGal beta-1,3-N-acetylglucosaminyltransferase 2
11730289_a_at	-0.958461	8.23124	-6.39661	0.00701147	0.176877	ARHGAP5	Rho GTPase activating protein 5
11739972_at	-0.89775	8.2503	-6.39392	0.0070201	0.176877	NUAK1	NUAK family, SNF1-like kinase, 1
11717923_s_at	-2.87718	9.96547	-6.39358	0.00702121	0.176877	YAP1	Yes-associated protein 1
11742909_at	-1.06038	8.12825	-6.39275	0.00702386	0.176877	ANKRD50	ankyrin repeat domain 50
11758043_s_at	-1.49594	10.3774	-6.39251	0.00702463	0.176877	IER2	immediate early response 2
11744794_a_at	-1.54506	9.22855	-6.39216	0.00702578	0.176877	MBNL1	muscleblind-like splicing regulator 1
11741088_a_at	-1.74918	8.79283	-6.39085	0.00702998	0.176893	GUCY1A3	guanylate cyclase 1, soluble, alpha 3
11756556_x_at	1.0567	10.3128	6.38836	0.00703797	0.176943	C20orf24 /// TGIF2-C20orf24	chromosome 20 open reading frame 24 /// TGIF2-C20orf24 readthrough
11732865_a_at	1.67016	7.18485	6.38801	0.0070391	0.176943	MS4A4A	membrane-spanning 4-domains, subfamily A, member 4A
11743985_s_at	-0.89633	9.30304	-6.38442	0.00705068	0.17713	AKAP1	A kinase (PRKA) anchor protein 1
11720499_at	-1.79321	8.82796	-6.38319	0.00705465	0.17713	CDC42EP3	CDC42 effector protein (Rho GTPase binding) 3
11747177_x_at	-2.43176	10.3008	-6.38133	0.00706066	0.17713	AQP1	aquaporin 1 (Colton blood group)
11717758_x_at	1.1436	7.99078	6.38055	0.00706318	0.17713	RALA	v-ral simian leukemia viral oncogene homolog A (ras related)
11741035_a_at	1.69798	7.78456	6.37962	0.00706618	0.17713	RPS6KA1	ribosomal protein S6 kinase, 90kDa, polypeptide 1
11720312_at	-0.895857	9.6489	-6.37905	0.00706803	0.17713	XRCC5	X-ray repair complementing defective repair in Chinese hamster cells 5 (double-strand-break rejoining)
11734995_x_at	-1.56202	9.84778	-6.37692	0.00707493	0.177213	SKI	v-ski sarcoma viral oncogene homolog (avian)
11751570_a_at	2.90643	8.94631	6.37332	0.00708661	0.177273	MS4A4A	membrane-spanning 4-domains, subfamily A, member 4A
11736593_a_at	-1.6927	8.40328	-6.37264	0.00708883	0.177273	LDB3	LIM domain binding 3
11723561_x_at	1.04936	8.93702	6.37174	0.00709175	0.177273	SMCO4	single-pass membrane protein with coiled-coil domains 4
11763472_x_at	0.901656	7.19766	6.37153	0.00709245	0.177273	ZC3H12D	zinc finger CCCH-type containing 12D
11721987_s_at	-1.02725	7.95778	-6.37067	0.00709523	0.177273	PRICKLE2	prickle homolog 2 (Drosophila)
11743396_a_at	-1.04862	11.7743	-6.36866	0.00710177	0.177347	CSDE1	cold shock domain containing E1, RNA-binding
11718973_at	2.44901	7.96171	6.3665	0.00710883	0.177391	LPL	lipoprotein lipase
11748230_a_at	1.4047	8.31644	6.36593	0.0071107	0.177391	CORO1A	coronin, actin binding protein, 1A
11732188_at	0.949655	8.69712	6.36322	0.00711953	0.177504	PI4K2A	phosphatidylinositol 4-kinase type 2 alpha
11743087_at	0.949154	8.55062	6.36234	0.0071224	0.177504	PPBP	pro-platelet basic protein (chemokine (C-X-C motif) ligand 7)
11761349_x_at	-3.14528	11.3598	-6.35815	0.00713613	0.17775	TPM1	tropomyosin 1 (alpha)
11717818_at	-1.30593	8.61068	-6.35714	0.00713945	0.17775	TNRC6A	trinucleotide repeat containing 6A
11749492_a_at	1.34381	7.1157	6.35474	0.00714732	0.177856	RPS6KA1	ribosomal protein S6 kinase, 90kDa, polypeptide 1
11720095_a_at	-0.963801	9.67052	-6.35356	0.00715121	0.177856	CUL4B	cullin 4B
11744156_a_at	1.47623	7.77955	6.35256	0.00715448	0.177856	RPS6KA1	ribosomal protein S6 kinase, 90kDa, polypeptide 1
11739141_a_at	1.10088	7.70254	6.34829	0.00716855	0.178025	LILRB5	leukocyte immunoglobulin-like receptor, subfamily B (with TM and ITIM domains), member 5
11746573_s_at	-1.44077	8.82142	-6.34754	0.00717103	0.178025	RHOB	ras homolog family member B
11728109_a_at	1.03259	6.56122	6.34516	0.00717889	0.178025	DNASE2B	deoxyribonuclease II beta
11756933_x_at	0.948746	7.92802	6.34426	0.00718184	0.178025	LRRC25	leucine rich repeat containing 25
11718772_at	-0.921438	8.95391	-6.34183	0.0071899	0.178025	SMARCE1	SWI/SNF related, matrix associated, actin dependent regulator of chromatin, subfamily e, member 1
11741076_a_at	0.906179	7.04092	6.34156	0.00719079	0.178025	CASP1	caspase 1, apoptosis-related cysteine peptidase
11719169_s_at	1.02265	10.7161	6.3406	0.00719395	0.178025	BRI3	brain protein I3
11758854_at	-1.60311	11.1936	-6.33999	0.00719598	0.178025	ATL3	atlastin GTPase 3
[truncated: 47,496 more rows]
