# Supplementary material for: Apolipoprotein E (ApoE) Rescues the Contractile Smooth Muscle Cell Phenotype in Popliteal Artery Aneurysm Disease
Source: Biomolecules. 2023 Jul 4;13(7):1074. doi: 10.3390/biom13071074 (PMC10377618; doi:10.3390/biom13071074)
Supplement: Supplementary file 1 [file biomolecules-13-01074-s001.zip › SupplTable4.xlsx]

## Sheet: raw data
		CVD II	CVD II	CVD II	CVD II	CVD II	CVD II	CVD II	CVD II	CVD II	CVD II	CVD II	CVD II	CVD II	CVD II	CVD II	CVD II	CVD II	CVD II	CVD II	CVD II	CVD II	CVD II	CVD II	CVD II	CVD II	CVD II	CVD II	CVD II	CVD II	CVD II	CVD II	CVD II	CVD II	CVD II	CVD II	CVD II	CVD II	CVD II	CVD II	CVD II	CVD II	CVD II	CVD II	CVD II	CVD II	CVD II	CVD II	CVD II
group	Linear NPX	101_BMP-6	102_ANG-1	103_ADM	105_CD40-L	106_SLAMF7	107_PlGF	108_ADAM-TS13	109_Protein BOC	110_IL-4RA	111_SRC	112_IL-1ra	113_IL-6	114_TNFRSF10A	115_STK4	116_IDUA	117_TNFRSF11A	118_PAR-1	120_TRAIL-R2	121_PRSS27	122_TIE2	123_TF	124_IL1RL2	125_PDGF subunit B	126_IL27	127_IL-17D	128_CXCL1	129_LOX-1	130_Gal-9	131_GIF	132_SCF	133_IL-18	134_FGF-21	135_PIgR	136_RAGE	137_SOD2	138_CTRC	139_FGF-23	140_SPON2	141_GH	142_FS	143_GLO1	144_CD84	145_PAPPA	148_SERPINA12	149_REN	150_DECR1	151_MERTK	152_TIM
athero Aorta	19	2.45897	43.7277	1.70671	12.0062	1.99658	139.672	1.57588	NaN	3.03981	190.112	61.1999	528.05	67.9314	9.40711	38.3329	3.10411	14.6306	205.563	3.46878	9.60858	369.935	2.20513	313.358	1.3596	5.17501	211.47	506.687	493.102	NaN	2.64629	47.4479	NaN	2.59096	2.40891	443.527	9.63223	1.49675	10.1426	9.15375	949.343	398.234	3.14535	20.2268	NaN	3.32158	31.9839	NaN	3.25539
athero Aorta	20
athero Aorta	16	1.59911	19.7696	NaN	2.80928	1.70183	155.172	NaN	NaN	1.53704	23.4398	3.9566	26.8197	8.09369	4.8246	28.3482	2.4793	16.867	49.6759	NaN	7.88492	324.362	NaN	11.5086	NaN	6.67491	16.1261	127.926	312.84	NaN	1.35522	12.1605	1.81529	1.2575	1.84143	414.086	3.35582	NaN	9.09621	11.6458	1872.94	345.773	1.45451	46.4071	NaN	4.89824	32.685	NaN	NaN
athero Aorta	17	1.66982	32.3752	NaN	10.0236	NaN	29.6017	NaN	NaN	1.25156	109.328	7.85535	26.1363	6.50228	4.89643	20.698	2.17023	5.6206	19.2968	2.78917	5.80229	412.374	NaN	80.5033	NaN	7.65189	77.0714	435.796	133.43	NaN	2.74335	18.817	NaN	1.36432	1.63524	380.237	8.06689	NaN	5.17563	13.3707	967.192	327.682	1.80368	7.74851	NaN	7.60357	28.2534	NaN	1.61249
athero Aorta	22	11.1096	64.5401	NaN	10.0478	NaN	334.937	1.25952	2.33391	1.94106	88.2299	27.0937	596.142	24.335	7.51584	53.7496	2.95267	11.6346	95.5683	2.05991	13.1817	498.098	1.83858	81.5467	NaN	52.3818	230.26	538.185	351.031	NaN	5.70881	79.233	NaN	1.38315	2.64548	453.469	6.18535	1.44998	15.0367	25.1947	3270.82	437.028	1.72906	101.059	1.12071	2.274	5.70886	NaN	3.77192
athero Aorta	23	11.4719	75.1004	NaN	3.95362	NaN	588.395	1.26374	1.2774	1.30506	61.1218	19.5206	175.315	11.7934	2.96375	25.7109	2.29084	29.3611	54.3864	1.99251	7.21887	206.774	NaN	65.1554	1.16458	36.3038	77.3619	336.889	166.76	NaN	3.51247	29.083	2.38664	2.35949	2.85713	389.587	4.40013	1.33526	10.2092	22.722	2615.34	406.089	1.34308	38.4672	NaN	1.98421	2.76529	NaN	1.50718
athero Aorta	24	14.1549	75.8389	NaN	9.37658	NaN	678.421	1.50965	1.54808	1.89268	118.447	105.434	164.431	59.0493	19.8133	47.0623	11.0191	39.6431	231.181	2.22606	11.5493	376.476	2.25185	155.224	1.57383	29.5037	76.149	368.266	456.558	NaN	5.97524	146.62	2.23983	2.43594	2.29716	477.263	22.2376	1.43835	32.7129	14.7308	4333.6	412.879	4.24476	54.0431	NaN	1.80147	3.27034	0.959939	3.05561
AAA big	61	2.24993	76.7693	1.53364	10.7095	NaN	452.933	1.37892	2.14917	1.57256	64.3782	42.4509	149.102	14.3778	7.65331	47.3298	4.09441	37.7544	64.1787	3.76503	7.6797	465.947	1.59464	89.4571	1.68147	28.9832	97.5531	286.942	301.946	0.852847	4.56939	34.6572	2.98956	5.46631	2.50658	478.705	9.74932	1.49892	26.0335	15.5961	3366.3	368.249	2.64175	99.3103	NaN	6.27474	2.49825	NaN	2.5192
AAA big	62	7.09022	67.8231	1.47595	12.2849	1.58282	522.743	1.49617	2.15284	1.63364	75.8894	54.4477	613.836	24.257	13.8675	47.4882	5.93207	48.3586	99.5357	3.8972	10.944	517.263	2.20246	70.0704	NaN	18.8998	145.725	265.095	438.81	1.43588	5.42076	60.0317	1.83911	5.08914	2.68445	520.314	9.95917	1.50181	17.5377	40.8173	6079.61	450.762	2.31765	38.7189	NaN	3.53713	2.52545	1.0972	2.24094
AAA big	50	NaN	4.11783	NaN	NaN	NaN	140.582	NaN	NaN	1.25433	11.3881	45.0898	671.868	8.77535	1.98278	28.2755	3.23349	14.9627	52.6514	1.85023	3.20113	218.201	2.18219	35.7385	NaN	2.03042	133.113	297.614	199.023	0.834613	2.21284	19.9374	NaN	2.50748	1.95795	303.633	3.09916	NaN	15.4846	10.0109	1233.01	166.367	1.633	5.71198	3.95919	2.06772	2.17374	NaN	2.85441
AAA big	52	6.09784	44.2526	NaN	7.38172	NaN	305.827	1.26619	NaN	1.49802	81.1769	128.152	321.025	25.8758	10.165	47.3176	4.27044	22.3055	113.598	2.23165	6.63277	428.717	1.64687	62.7937	NaN	11.2683	143.434	489.644	395.866	0.73921	4.26712	132.906	1.94468	3.60518	2.98391	467.303	7.72685	1.47687	15.084	9.87367	2552.27	338.251	2.62616	67.7441	1.37362	2.95681	3.6906	NaN	3.11345
AAA big	54	2.88417	38.0786	3.41338	28.7779	2.06093	139.883	NaN	2.64698	2.48191	128.534	34.1336	1014.57	79.1106	30.491	72.088	4.23596	33.573	150.381	2.53232	10.7254	757.215	2.94593	93.0081	1.91563	16.0242	404.77	557.637	500.555	0.732734	4.62869	135.601	3.17309	4.05404	2.18348	481.323	4.65017	1.6962	16.597	10.3815	3298.29	424.441	2.96221	86.7673	NaN	7.89707	11.264	NaN	1.92925
AAA big	55	1.4662	47.4091	1.90158	15.383	1.81093	102.439	1.57892	1.76704	2.53185	125.269	52.1378	773.905	37.4553	18.9977	56.4043	3.87138	15.629	152.668	3.219	11.7668	438.884	2.16937	128.743	1.68771	12.6492	357.451	601.564	491.383	0.64978	5.94842	117.453	2.88531	2.04912	2.35139	464.566	3.18767	1.38447	11.1277	5.48426	2505.32	381.646	4.08954	42.8362	NaN	4.08278	12.7764	1.04958	3.21074
AAA big	57	3.14173	35.8434	NaN	10.341	NaN	98.4392	1.26652	1.52005	1.38389	55.4495	27.0582	271.414	39.9257	12.8937	37.1153	4.24312	45.1485	75.431	2.14917	7.41393	674.407	1.5882	46.1615	1.28358	12.8799	75.9032	377.607	368.601	NaN	2.8683	65.5029	1.51738	3.04127	2.59633	461.78	4.94845	1.30493	8.91926	9.58282	3284.5	408.09	1.81191	47.7181	NaN	3.42598	5.1327	NaN	2.21573
AAA big	58	2.88897	29.1211	1.71602	8.41831	NaN	189.532	NaN	1.80111	1.77925	69.6385	57.8958	885.658	56.1456	19.351	62.0444	5.55201	39.2291	137.805	2.16894	10.8104	747.651	2.11254	38.9833	NaN	15.0509	169.095	428.265	452.733	0.541113	4.09213	103.365	1.7439	3.18804	2.35309	467.676	4.07045	1.33701	16.7813	13.6421	4990.92	458.443	2.28723	53.8526	NaN	4.07495	3.73165	NaN	2.58074
AAA big	59	2.42574	102.343	1.98255	13.8256	1.62544	276.34	NaN	1.94277	2.26609	93.0732	44.8757	603.872	32.263	17.7277	61.5099	5.21017	33.6728	118.923	2.99421	12.0496	785.764	2.02411	94.9041	1.21851	26.6317	282.49	551.712	485.822	0.611534	7.64256	98.8903	3.67694	3.18326	2.72293	495.351	5.47294	1.62183	26.1373	22.5108	5806.14	455.641	2.44947	66.4205	NaN	5.88747	9.27298	NaN	2.50575
small AAA	49	1.92611	34.4748	1.86151	4.86134	NaN	292.999	1.47421	1.3765	1.55068	41.2551	67.9545	1251.81	17.7709	5.05564	29.1848	3.10702	31.0954	115.777	2.80526	6.77157	245.696	NaN	96.3122	1.27858	5.23804	81.3747	357.508	275.004	0.957042	3.00844	53.4903	NaN	5.40051	4.42332	429.92	9.87011	1.52296	10.5957	21.2841	4919.12	300.155	2.39245	13.9479	NaN	2.8967	3.02378	NaN	3.77592
small AAA	60	1.15103	31.9622	NaN	7.46559	NaN	90.0297	1.74397	NaN	1.32607	22.5188	15.3245	469.396	11.214	5.06877	25.6255	2.6995	12.122	36.2876	2.62588	6.62728	247.928	NaN	178.837	NaN	8.42814	397.172	343.48	219.185	0.620904	3.95283	26.3315	1.67655	4.85333	1.60218	433.528	6.77553	1.42377	6.31431	9.80557	2324.66	338.086	3.24327	20.6222	NaN	2.21783	2.37421	NaN	6.22819
small AAA	51	1.81571	39.2267	NaN	6.95834	NaN	518.273	1.61387	1.88575	1.78551	56.9875	41.8498	565.482	24.5112	11.7506	64.3258	4.38406	32.4632	83.2054	2.10996	11.237	789.125	1.8955	55.667	NaN	12.2835	273.669	574.575	327.561	NaN	3.86129	36.8099	NaN	4.28641	1.7242	479.757	4.8649	1.39305	24.0032	10.1968	3232.26	379.763	2.05349	87.9619	NaN	3.45897	2.74703	NaN	2.86556
small AAA	56	1.33115	29.9361	1.42878	7.34548	NaN	51.4318	1.75944	NaN	1.4169	55.4107	29.528	1002.21	14.3016	8.06055	30.104	2.58054	6.9509	51.9678	3.01482	6.27606	192.278	1.55821	76.7935	NaN	4.58251	191.352	516.159	377.602	NaN	3.75422	41.8103	1.65682	3.46837	1.79805	439.818	3.3137	1.43404	8.14161	11.5995	1522.25	312.327	2.31429	20.5699	NaN	4.40396	4.27203	NaN	4.02399
small AAA	53	2.80131	38.4454	1.84586	8.60394	1.68193	132.802	NaN	1.79077	1.9133	57.0884	57.5854	1649.32	19.4357	15.6608	57.1252	3.07256	24.88	94.1467	2.39109	9.96439	534.353	1.67375	42.3925	1.28409	18.3621	389.928	570.896	356.209	0.73899	3.38898	56.9099	8.93604	6.33641	1.81265	481.531	9.24875	1.4476	20.3512	6.57208	3354.19	433.433	2.31093	82.8158	NaN	2.37625	17.2335	0.965442	1.91082
small AAA
small AAA	47	3.31528	17.7259	NaN	6.74478	NaN	59.316	1.82917	NaN	NaN	66.6807	13.9624	240.348	10.8623	3.99539	9.96149	2.04344	3.97635	18.7172	3.80994	5.81092	46.443	NaN	110.126	NaN	2.09936	69.7359	346.988	204.181	0.847835	3.63185	21.2132	1.88299	6.43013	1.32412	300.9	2.75711	1.30743	8.67848	15.4085	337.395	229.026	2.2379	4.50947	NaN	2.89501	2.71732	NaN	2.24262
small AAA	48	2.76145	25.0526	2.31428	7.49343	NaN	108.642	2.37868	1.33643	1.37876	54.7096	29.8786	3733.76	15.7496	5.41235	35.6232	2.52366	14.3772	64.9267	2.95791	7.4564	144.392	1.6368	94.3335	NaN	5.96386	153.399	389.476	263.876	0.704373	3.64375	28.7582	1.87974	5.5668	1.64899	452.631	9.07314	1.58462	12.6389	13.9084	3252.23	344.99	2.29677	18.7307	NaN	3.6274	4.5825	NaN	2.86669
small AAA	63	3.36853	51.8566	1.53509	19.252	1.6198	196.701	1.32581	1.82253	2.31436	116.332	43.0377	1049.56	57.7754	25.6465	66.8085	5.03944	34.6612	110.618	3.15686	12.5401	662.995	2.28175	97.8737	1.53944	13.5506	378.153	523.964	472.752	0.860993	5.28959	93.4204	NaN	2.41448	2.48903	515.927	14.1886	1.87504	22.121	12.9203	5234.29	445.064	3.20059	57.5284	NaN	4.53985	10.8149	NaN	2.54634
small AAA	64	2.73236	53.2044	2.75103	14.6725	NaN	253.353	1.54189	1.58943	2.03212	110.835	62.0197	787.334	46.8877	19.806	56.0934	5.24565	32.4708	121.659	3.92412	9.37892	497.085	2.02731	107.963	1.39368	8.95802	278.995	514.246	455.899	0.745671	4.41211	85.8892	1.83457	3.00095	2.91426	499.277	12.6725	1.63196	14.9033	23.9144	3866.02	411.468	3.01164	31.0714	NaN	4.34459	7.8472	0.962972	3.58924
A.pop	21	32.0231	49.014	NaN	5.13953	1.58622	707.718	NaN	1.44646	1.15784	97.9396	6.76438	105.749	11.9147	2.58977	28.2525	1.58962	22.9177	57.9169	1.52014	5.81579	331.794	NaN	65.4056	NaN	103.117	54.7581	255.717	133.041	NaN	4.00079	18.532	1.4221	1.1921	2.89076	395.718	4.01294	1.55415	10.6325	12.4696	4432.21	441.741	1.59217	74.0661	1.45381	NaN	2.39499	NaN	1.24835
A.pop	35	1.96911	30.6872	2.81498	3.26039	NaN	192.035	2.4371	1.34935	1.51878	52.471	106.585	802.247	47.6809	11.9686	41.1835	3.36152	41.1815	150.333	2.66972	10.7351	307.073	1.83343	134.526	NaN	14.2196	113.579	339.738	274.504	0.999873	4.15424	47.8512	NaN	5.53154	1.82295	479.235	9.58719	1.30469	20.4557	8.72707	3024.97	344.539	3.04985	15.275	NaN	2.63335	3.94161	NaN	4.96306
A.pop	37	3.13917	124.308	NaN	5.59218	NaN	1514.53	1.27658	1.62683	1.87468	109.84	28.9622	152.822	40.3983	12.1788	54.8169	4.54308	65.5471	130.889	2.02508	15.7922	367.178	2.4459	50.1552	1.33796	30.4774	36.9005	150.715	345.022	0.541658	9.02552	30.3477	NaN	3.33134	6.03211	485.871	10.9402	1.57716	26.6757	13.3006	4989.38	491.277	2.04257	62.5818	NaN	2.22018	4.43889	NaN	1.94785
A.pop	25	5.64778	71.9921	NaN	5.46969	1.62428	591.146	1.38134	1.42579	1.46366	77.4719	46.8552	100.349	26.7024	7.18888	39.7519	4.11702	28.0692	101.815	1.55311	8.68269	239.598	1.55703	70.1836	1.15594	19.8314	44.1925	229.142	394.738	NaN	4.79237	119.183	NaN	1.75391	2.19678	462.759	10.2541	1.41409	18.423	8.66756	3128.07	376.237	2.22164	27.7916	NaN	1.72258	9.78865	NaN	1.37371
A.pop	27	2.96309	44.2967	NaN	6.01737	NaN	373.753	1.27781	1.46488	1.71984	60.2569	71.9352	421.765	44.9105	10.7333	62.3204	4.85405	25.816	211.914	1.96906	13.4735	212.099	2.59646	121.111	NaN	18.8667	343.208	281.557	418.453	NaN	5.80054	122.228	1.54552	2.7052	3.46559	468.366	14.7334	NaN	48.1291	12.9708	6754.27	387.337	3.40267	47.4199	NaN	2.02529	12.0235	NaN	1.97578
A.pop	28	24.3817	75.4431	NaN	4.46218	NaN	1469.03	1.31634	1.85569	1.70224	117.288	14.3419	84.2625	16.9537	7.85283	48.2215	3.26123	52.868	81.3884	2.3437	8.75605	363.192	1.77279	34.9025	NaN	50.1639	43.3922	272.666	254.209	NaN	6.02227	28.0142	1.44266	2.95062	3.92542	483.143	9.88027	1.3588	16.1355	9.3391	4061.42	453.883	1.63091	38.0615	1.32568	3.21096	2.82597	NaN	1.24051
PAA	29	3.60895	35.0532	1.60382	5.69292	NaN	436.11	1.31214	NaN	1.58303	42.6121	72.9905	780.672	35.7626	6.61821	36.8756	3.54251	30.3094	96.8382	1.53152	9.01707	277.882	2.09887	70.2837	NaN	13.7177	365.155	211.783	279.055	NaN	4.25552	38.3515	NaN	2.92599	2.24691	487.955	4.86373	NaN	17.1047	5.30725	3376	387.351	2.07257	14.0236	NaN	2.09847	4.34465	NaN	2.46556
PAA	30	7.05423	70.8927	NaN	6.13568	NaN	450.898	1.32323	1.33909	1.55835	55.1712	40.8981	305.152	19.5538	8.58004	33.9061	3.71962	40.6208	97.5697	2.74493	8.09846	200.834	1.70064	49.2248	1.54745	17.7826	170.107	206.956	326.406	NaN	4.35615	49.5278	1.51175	5.75072	5.75192	475.084	11.0793	1.84072	26.5594	31.0063	2995.27	402.777	2.10724	37.0913	NaN	3.51749	7.20017	NaN	4.16618
PAA	31	3.0151	55.168	NaN	5.96407	NaN	454.37	1.5143	2.09317	2.24296	119.934	126.2	254.272	56.9353	17.4098	61.6065	7.12373	42.6879	222.892	2.44782	13.4511	383.956	3.02106	90.9787	NaN	30.4427	176.912	297.84	495.754	NaN	6.77921	128.868	1.59914	4.34518	3.09837	482.893	8.42217	1.93244	36.9269	14.4389	3774.94	387.768	4.45656	28.9654	1.36074	3.07962	7.36724	0.963586	3.01863
PAA	32	2.14333	31.5255	NaN	5.1477	NaN	305.078	1.79808	1.5087	1.65873	70.3654	90.125	172.526	31.9746	9.24347	47.0577	4.63252	26.4273	118.888	2.30685	9.29793	205.277	1.7983	46.5643	NaN	16.186	149.062	229.966	454.165	NaN	5.10306	78.5214	1.72005	4.38988	2.21145	493.116	5.59248	1.89843	18.7508	9.44271	3354.12	345.97	2.79725	14.2553	NaN	3.18583	9.44782	NaN	3.84384
PAA	33	1.96626	39.1105	NaN	2.99677	NaN	190.191	2.95908	1.55174	1.28017	37.1487	28.0325	945.241	19.4108	7.8854	48.5438	3.38963	15.2609	123.004	1.90408	10.3311	127.855	1.68354	49.8454	NaN	19.7858	177.339	150.749	322.582	0.559241	4.67663	41.3352	1.60483	4.12879	1.83948	479.482	3.24764	NaN	26.5353	11.4308	6579.31	301.221	1.78453	35.4011	NaN	5.22937	2.78406	NaN	2.39994
PAA	34	2.57817	30.7562	1.96821	3.58928	NaN	347.021	2.74377	1.70764	1.8414	52.8371	113.279	747.923	51.4246	9.3342	44.8585	3.66638	32.2017	145.957	2.19782	11.9312	428.339	2.34322	111.532	NaN	15.6181	334.784	256.046	323.568	0.879653	4.95953	44.5776	1.58106	5.99926	1.97556	474.063	10.9262	1.40074	28.4778	10.8693	4938.52	338.981	3.08433	22.7134	NaN	3.0654	4.8579	NaN	5.06408
PAA	38	1.82354	31.8258	NaN	12.0607	1.70346	506.665	1.23253	2.43046	1.93142	110.406	93.1841	198.663	42.8511	18.2103	57.0725	9.2568	32.166	175.327	3.42311	16.6426	290.026	2.48454	85.2058	1.28114	24.3037	125.197	414.468	424.531	0.601738	6.49849	406.685	1.69539	4.0829	3.00079	433.559	7.71255	1.35682	37.4845	3.20396	2142.38	440.852	4.11176	26.7651	NaN	7.49106	1.88081	0.986808	4.26021
PAA	39	21.9265	56.7485	NaN	6.89062	1.58976	447.013	1.28544	1.33819	1.35438	71.7005	56.4314	294.809	27.494	8.47859	41.7623	4.33057	48.9392	122.312	2.28759	8.89113	303.618	1.98606	61.7446	NaN	15.5463	90.61	292.443	395.093	NaN	4.36929	127.985	1.51394	4.17397	4.4205	452.259	10.8029	1.36861	21.1825	3.14495	2428.65	400.976	2.08186	14.5129	NaN	3.95563	2.906	NaN	2.71986
PAA	40	3.90078	34.882	NaN	6.01049	NaN	131.176	1.78125	1.82811	1.27387	49.7083	31.307	194.866	21.8727	6.19093	45.2019	4.48122	19.0278	81.3097	2.12759	9.42226	143.332	1.68437	56.0643	NaN	18.0999	66.5222	157.754	308.976	NaN	4.86354	56.2646	NaN	2.85705	2.44748	447.33	6.46287	NaN	23.1616	3.31302	2572.85	371.512	1.88705	36.3576	NaN	2.20056	4.31918	NaN	2.38521
PAA	41	5.93564	123.687	NaN	56.3009	NaN	210.127	1.28186	NaN	1.41638	200.208	24.1261	51.1235	14.5873	10.9679	39.4261	4.14933	29.0269	98.7986	5.91711	7.08367	97.6766	NaN	203.236	1.17185	16.5796	112.042	437.717	310.488	0.635268	3.8236	32.1329	NaN	2.9124	10.9267	449.028	19.6472	1.59183	32.4477	8.25725	5524.15	366.799	3.14105	41.8654	NaN	2.22468	2.815	NaN	1.94515
PAA	42	3.56449	75.9842	1.39421	6.23747	NaN	171.681	NaN	NaN	1.27991	108.785	14.2508	474.99	5.21483	6.36692	20.9193	1.82282	10.4432	38.7595	2.76912	5.6269	179.036	NaN	97.5648	1.58971	18.8993	164.816	583.987	232.122	NaN	3.24353	24.9788	1.93483	1.11643	2.35223	347.638	9.74477	1.51884	11.9155	6.84626	2652.48	293.961	1.94799	24.7054	1.43334	1.76644	8.46584	NaN	2.78062
PAA	43	52.7498	75.2861	NaN	11.0923	NaN	677.861	NaN	NaN	1.18487	96.6362	11.1637	245.438	6.48666	4.02326	20.847	2.00018	29.9263	33.6523	1.8752	5.01798	262.79	NaN	169.76	1.25104	31.366	55.7623	280.269	250.98	0.543744	3.57366	21.7828	NaN	1.21141	2.92527	404.052	6.46884	1.6064	21.0701	21.632	3084.55	405.655	1.30729	18.0153	1.23906	2.01758	5.39474	NaN	1.87234
PAA	44	2.525	18.1112	1.78852	4.22217	NaN	461.434	2.57971	1.87203	1.72258	44.6945	23.0885	1176.91	32.5501	10.094	60.6559	2.71636	30.6178	201.115	3.78844	18.8854	506.536	1.8785	40.9038	NaN	21.8836	283.63	416.296	349.773	0.780027	5.64268	25.7542	1.99738	7.21684	2.25567	493.443	5.46762	1.5182	65.0502	5.0813	6872.03	306.926	1.64194	37.8749	NaN	1.99503	2.20786	0.951402	10.7627
PAA	45	1.60412	34.9291	1.49132	5.51947	NaN	129.931	1.72882	1.33233	1.31939	40.8705	69.0216	607.631	16.9409	8.46442	40.8158	3.12241	21.9931	123.681	3.77201	11.1511	402.87	2.35332	49.3295	NaN	7.01454	330.33	422.023	396.044	0.948678	4.67742	48.8217	NaN	5.05959	2.68103	481.41	4.15431	NaN	22.8382	11.2604	4795.54	301.103	2.08677	9.89411	NaN	3.38938	2.88912	NaN	7.54114
PAA	36	1.84647	44.0838	NaN	6.04726	1.70142	554.106	1.24087	2.6015	2.31109	109.824	58.7684	133.949	41.744	9.46228	68.894	4.04312	26.2402	186.714	2.68364	21.8024	154.807	3.21376	64.4691	NaN	40.3165	73.837	209.836	446.723	NaN	8.96486	43.712	NaN	3.36319	9.84387	517.553	12.8108	NaN	48.9756	11.1258	4141.11	471.451	2.48209	54.8138	1.563	2.30108	8.85822	NaN	2.02178
PAA	18	3.83381	56.1627	1.35296	32.1296	1.6267	94.8812	1.77228	NaN	1.75048	198.686	99.6196	51.3167	23.7681	17.3707	45.0271	5.32288	20.843	122.764	11.1012	5.42457	138.05	1.59109	229.437	NaN	7.0738	230.161	548.557	446.547	NaN	3.03002	55.6981	1.90459	6.87922	2.3086	443.815	8.27182	1.37491	19.351	37.4666	1489.23	371.39	4.97835	10.634	1.25233	4.9535	49.6922	NaN	12.1152
	#MissDataFreq(%)	1,15%	0%	43,68%	32,18%	60,92%	0%	56,32%	32,18%	1,15%	0%	0%	0%	0%	0%	0%	0%	0%	0%	32,18%	0%	0%	19,54%	27,59%	63,22%	0%	0%	0%	0%	71,26%	0%	1,15%	55,17%	25,29%	0%	0%	22,99%	33,33%	0%	27,59%	0%	0%	3,45%	0%	72,41%	31,03%	2,30%	88,51%	32,18%
	#LOD-Chip1	1.11424	0.96128	1.3444	1.26884	1.57224	1.34981	1.18935	1.26872	1.12177	1.18696	0.87047	1.3073	1.46396	0.96274	0.874156	1.26962	1.39238	1.60657	1.01175	1.26472	0.982891	1.47435	1.18537	1.1376	1.37942	1.76938	2.20021	1.02294	0.516239	1.24692	1.79836	1.4212	0.4104	0.671309	0.834121	1.10451	1.30343	1.21401	1.21892	1.82606	0.747813	1.11473	1.17256	1.09616	1.49828	1.76221	0.940913	0.95929
	log 2'NPX	101_BMP-6	102_ANG-1	103_ADM	105_CD40-L	106_SLAMF7	107_PlGF	108_ADAM-TS13	109_Protein BOC	110_IL-4RA	111_SRC	112_IL-1ra	113_IL-6	114_TNFRSF10A	115_STK4	116_IDUA	117_TNFRSF11A	118_PAR-1	120_TRAIL-R2	121_PRSS27	122_TIE2	123_TF	124_IL1RL2	125_PDGF subunit B	126_IL27	127_IL-17D	128_CXCL1	129_LOX-1	130_Gal-9	131_GIF	132_SCF	133_IL-18	134_FGF-21	135_PIgR	136_RAGE	137_SOD2	138_CTRC	139_FGF-23	140_SPON2	141_GH	142_FS	143_GLO1	144_CD84	145_PAPPA	148_SERPINA12	149_REN	150_DECR1	151_MERTK	152_TIM
athero Aorta	19	1.29805	5.45048	0.771222	3.58571	0.997533	7.1259	0.656162	NaN	1.60398	7.57071	5.93546	9.04453	6.08601	3.23375	5.26051	1.63418	3.87092	7.68344	1.79443	3.26432	8.53113	1.14087	8.29167	0.443184	2.37156	7.72431	8.98495	8.94574	NaN	1.40397	5.56827	NaN	1.37348	1.26838	8.79288	3.26787	0.581837	3.34236	3.19436	9.89079	8.63747	1.65322	4.3382	NaN	1.73187	4.99928	NaN	1.70283
athero Aorta	20
athero Aorta	16	0.677267	4.30521	NaN	1.4902	0.767087	7.27773	NaN	NaN	0.620153	4.55089	1.98426	4.74522	3.0168	2.27041	4.82518	1.30993	4.07614	5.63448	NaN	2.9791	8.34146	NaN	3.52464	NaN	2.73875	4.01133	6.99916	8.28928	NaN	0.438529	3.60413	0.860204	0.330558	0.880824	8.69379	1.74667	NaN	3.18527	3.54174	10.8711	8.43368	0.540533	5.53627	NaN	2.29226	5.03055	NaN	NaN
athero Aorta	17	0.739694	5.01682	NaN	3.32533	NaN	4.88761	NaN	NaN	0.323728	6.77252	2.97368	4.70798	2.70094	2.29173	4.37142	1.11785	2.49072	4.27029	1.47984	2.53662	8.68781	NaN	6.33098	NaN	2.93582	6.26812	8.76751	7.05994	NaN	1.45594	4.23396	NaN	0.448186	0.709502	8.57076	3.01201	NaN	2.37173	3.741	9.91766	8.35615	0.850943	2.95392	NaN	2.92668	4.82035	NaN	0.689288
athero Aorta	22	3.47373	6.01212	NaN	3.3288	NaN	8.38775	0.332875	1.22275	0.956844	6.4632	4.75988	9.21951	4.60496	2.90994	5.74818	1.56202	3.54035	6.57846	1.04258	3.72047	8.96029	0.87859	6.34956	NaN	5.71099	7.84712	9.07196	8.45545	NaN	2.51319	6.30803	NaN	0.46796	1.40353	8.82486	2.62886	0.536031	3.91041	4.65505	11.6754	8.77158	0.789989	6.65905	0.164418	1.18523	2.5132	NaN	1.9153
athero Aorta	23	3.52003	6.23075	NaN	1.98318	NaN	9.20064	0.337696	0.353214	0.384114	5.93362	4.28692	7.45381	3.55991	1.56742	4.68431	1.19588	4.87583	5.76517	0.994588	2.85177	7.69191	NaN	6.02581	0.219815	5.18205	6.27355	8.39613	7.38163	NaN	1.81249	4.8621	1.25498	1.23847	1.51457	8.6058	2.13754	0.417117	3.3518	4.50602	11.3528	8.66565	0.425541	5.26556	NaN	0.988563	1.46743	NaN	0.591854
athero Aorta	24	3.82323	6.24487	NaN	3.22906	NaN	9.40604	0.594217	0.630482	0.920432	6.8881	6.72019	7.36134	5.88385	4.3084	5.5565	3.46194	5.309	7.85288	1.15449	3.52973	8.55641	1.17111	7.2782	0.654277	4.88282	6.25075	8.5246	8.83465	NaN	2.579	7.19594	1.16339	1.28448	1.19985	8.89864	4.47493	0.524417	5.03179	3.88076	12.0813	8.68958	2.08568	5.75604	NaN	0.849171	1.70944	-0.0589847	1.61146
AAA big	61	1.16988	6.26246	0.616964	3.42082	NaN	8.82316	0.463542	1.10378	0.653119	6.0085	5.40772	7.22016	3.84577	2.93608	5.56468	2.03365	5.23857	6.00402	1.91266	2.94105	8.86402	0.673234	6.48312	0.749722	4.85714	6.60812	8.16461	8.23815	-0.229642	2.192	5.11508	1.57993	2.45057	1.32572	8.90299	3.2853	0.58392	4.7023	3.96311	11.7169	8.52454	1.40149	6.63387	NaN	2.64956	1.32092	NaN	1.33297
AAA big	62	2.82583	6.0837	0.561641	3.61881	0.662495	9.02996	0.581276	1.10624	0.708089	6.24583	5.7668	9.26171	4.60033	3.79363	5.5695	2.56854	5.5957	6.63714	1.96244	3.45206	9.01475	1.13912	6.13073	NaN	4.2403	7.1871	8.05036	8.77745	0.521933	2.43849	5.90765	0.879005	2.34742	1.42463	9.02324	3.31603	0.586703	4.13239	5.35111	12.5698	8.81622	1.21267	5.27497	NaN	1.82258	1.33654	0.133828	1.16411
AAA big	50	NaN	2.04189	NaN	NaN	NaN	7.13527	NaN	NaN	0.326918	3.50945	5.49473	9.39203	3.13346	0.987523	4.82148	1.69309	3.9033	5.7184	0.887701	1.67858	7.76951	1.12578	5.15941	NaN	1.02178	7.0565	8.2173	7.63679	-0.260821	1.1459	4.31741	NaN	1.32624	0.969345	8.24618	1.63188	NaN	3.95276	3.3235	10.268	7.37822	0.707525	2.51399	1.9852	1.04804	1.12018	NaN	1.51319
AAA big	52	2.6083	5.46769	NaN	2.88396	NaN	8.25657	0.340493	NaN	0.583052	6.343	7.00172	8.32654	4.69353	3.34553	5.56431	2.09438	4.47933	6.82779	1.15811	2.72961	8.74388	0.719725	5.97255	NaN	3.4942	7.16424	8.93559	8.62887	-0.435944	2.09326	7.05426	0.959536	1.85007	1.5772	8.86822	2.94988	0.562541	3.91495	3.30359	11.3176	8.40195	1.39295	6.08202	0.457983	1.56404	1.88386	NaN	1.63851
AAA big	54	1.52816	5.25091	1.7712	4.84689	1.0433	7.12808	NaN	1.40435	1.31145	7.006	5.09312	9.98665	6.3058	4.93031	6.17169	2.08269	5.06923	7.23248	1.34046	3.42295	9.56456	1.55872	6.53929	0.937819	4.00218	8.66096	9.12318	8.96738	-0.448639	2.2106	7.08322	1.66589	2.01936	1.12663	8.91086	2.21728	0.762306	4.05285	3.37595	11.6875	8.72942	1.56668	6.43908	NaN	2.98132	3.49365	NaN	0.948043
AAA big	55	0.552078	5.56709	0.927197	3.94326	0.856729	6.67862	0.658941	0.821338	1.34019	6.96889	5.70426	9.59601	5.2271	4.24775	5.81773	1.95285	3.96615	7.25425	1.68661	3.55665	8.7777	1.11727	7.00835	0.755068	3.66097	8.4816	9.23258	8.9407	-0.621976	2.57251	6.87594	1.52873	1.03501	1.23352	8.85974	1.6725	0.469331	3.47609	2.4553	11.2908	8.57609	2.03194	5.42076	NaN	2.02955	3.67541	0.0698188	1.68291
AAA big	57	1.65156	5.16364	NaN	3.37031	NaN	6.62116	0.340867	0.604118	0.468734	5.7931	4.75799	8.08435	5.31924	3.6886	5.21394	2.08512	5.49661	6.23709	1.10378	2.89024	9.39748	0.667394	5.52862	0.360171	3.68705	6.24609	8.56074	8.52592	NaN	1.5202	6.03349	0.60158	1.60467	1.37647	8.85106	2.30698	0.383976	3.15692	3.26045	11.6815	8.67274	0.857509	5.57646	NaN	1.77652	2.35972	NaN	1.14778
AAA big	58	1.53055	4.86399	0.779067	3.07353	NaN	7.5663	NaN	0.848888	0.83127	6.12181	5.85539	9.79061	5.8111	4.27433	5.95523	2.47301	5.29385	7.10649	1.11699	3.43435	9.54622	1.07898	5.28478	NaN	3.91177	7.40169	8.74236	8.82252	-0.885998	2.03285	6.6916	0.802313	1.67267	1.23456	8.86937	2.02519	0.419013	4.06878	3.76999	12.2851	8.8406	1.1936	5.75094	NaN	2.02678	1.89981	NaN	1.36779
AAA big	59	1.27842	6.67726	0.987358	3.78927	0.700834	8.1103	NaN	0.958112	1.18021	6.54029	5.48786	9.2381	5.01181	4.14793	5.94275	2.38133	5.07351	6.89388	1.58218	3.59091	9.61795	1.01729	6.5684	0.28512	4.73507	8.14206	9.10777	8.92428	-0.709495	2.93406	6.62776	1.87851	1.67051	1.44516	8.95231	2.45231	0.697626	4.70804	4.49255	12.5034	8.83175	1.29247	6.05356	NaN	2.55765	3.21303	NaN	1.32524
small AAA	49	0.945691	5.10747	0.896472	2.28135	NaN	8.19475	0.559942	0.461001	0.6329	5.3665	6.0865	10.2898	4.15145	2.3379	4.86715	1.63553	4.95863	6.85521	1.48813	2.75949	7.94073	NaN	6.58965	0.354541	2.38903	6.34651	8.48183	8.10331	-0.0633454	1.58902	5.7412	NaN	2.4331	2.14513	8.74792	3.30307	0.606877	3.4054	4.41171	12.2642	8.22956	1.25849	3.80198	NaN	1.53441	1.59636	NaN	1.91683
small AAA	60	0.202923	4.99829	NaN	2.90026	NaN	6.49233	0.802372	NaN	0.407157	4.49306	3.93777	8.87466	3.48723	2.34164	4.67951	1.43269	3.59956	5.1814	1.3928	2.72842	7.95378	NaN	7.4825	NaN	3.07521	8.63362	8.42408	7.776	-0.687558	1.98289	4.71872	0.745496	2.27897	0.680034	8.75998	2.76033	0.509713	2.65863	3.2936	11.1828	8.40124	1.69745	4.36613	NaN	1.14915	1.24745	NaN	2.63881
small AAA	51	0.860534	5.29377	NaN	2.79874	NaN	9.01757	0.690527	0.915135	0.836337	5.83257	5.38715	9.14334	4.61537	3.55467	6.00733	2.13227	5.02074	6.37861	1.07722	3.49018	9.62411	0.922576	5.79875	NaN	3.61865	8.09629	9.16635	8.35562	NaN	1.94908	5.20202	NaN	2.09977	0.785927	8.90616	2.28241	0.478246	4.58515	3.35004	11.6583	8.56896	1.03808	6.45881	NaN	1.79034	1.45787	NaN	1.51882
small AAA	56	0.412678	4.90381	0.514786	2.87686	NaN	5.68459	0.815115	NaN	0.502739	5.79209	4.88401	9.96898	3.8381	3.01088	4.91188	1.36767	2.7972	5.69954	1.59207	2.64986	7.58705	0.639894	6.26291	NaN	2.19614	7.58008	9.01167	8.56072	NaN	1.90851	5.38579	0.728413	1.79426	0.846434	8.78076	1.72844	0.520085	3.02531	3.53599	10.572	8.28691	1.21057	4.36246	NaN	2.1388	2.09492	NaN	2.00863
small AAA	53	1.4861	5.26474	0.88429	3.105	0.750121	7.05313	NaN	0.840577	0.936065	5.83513	5.84763	10.6877	4.28064	3.96909	5.83606	1.61944	4.63691	6.55684	1.25767	3.31678	9.06165	0.743084	5.40574	0.360752	4.19866	8.60707	9.15709	8.47658	-0.436374	1.76085	5.83061	3.15964	2.66367	0.858104	8.91148	3.20926	0.533664	4.34704	2.71635	11.7117	8.75967	1.20848	6.37183	NaN	1.24868	4.10714	-0.0507392	0.934193
small AAA	46
small AAA	47	1.72913	4.14779	NaN	2.75377	NaN	5.89035	0.871187	NaN	NaN	6.0592	3.80347	7.90898	3.44126	1.99833	3.31636	1.031	1.99144	4.22629	1.92977	2.53877	5.53739	NaN	6.78301	NaN	1.06995	6.12383	8.43874	7.67371	-0.238145	1.8607	4.40689	0.913022	2.68485	0.405029	8.23314	1.46316	0.386731	3.11744	3.94565	8.39829	7.83937	1.16215	2.17296	NaN	1.53357	1.44219	NaN	1.16518
small AAA	48	1.46542	4.64689	1.21056	2.90563	NaN	6.76344	1.25016	0.418389	0.46337	5.77372	4.90104	11.8664	3.97724	2.43626	5.15474	1.33552	3.84571	6.02074	1.56458	2.89848	7.17384	0.710882	6.5597	NaN	2.57625	7.26115	8.60539	8.04372	-0.505589	1.86542	4.8459	0.91053	2.47685	0.721579	8.82219	3.1816	0.664135	3.6598	3.79788	11.6672	8.43041	1.19961	4.22733	NaN	1.85893	2.19613	NaN	1.51939
small AAA	63	1.75212	5.69646	0.618322	4.26693	0.695813	7.61986	0.406877	0.865945	1.21061	6.8621	5.42753	10.0356	5.85238	4.68069	6.06196	2.33326	5.11525	6.78944	1.65849	3.64848	9.37285	1.19014	6.61285	0.622401	3.76028	8.56283	9.03332	8.88494	-0.215927	2.40316	6.54567	NaN	1.27171	1.31558	9.01102	3.82666	0.906918	4.46735	3.69157	12.3538	8.79787	1.67834	5.8462	NaN	2.18264	3.43495	NaN	1.34843
small AAA	64	1.45015	5.73347	1.45997	3.87505	NaN	7.985	0.6247	0.668512	1.02298	6.79227	5.95465	9.62083	5.55114	4.30786	5.80976	2.39112	5.02107	6.9267	1.97237	3.22942	8.95735	1.01957	6.7544	0.478895	3.16318	8.1241	9.00631	8.83257	-0.423388	2.14147	6.4244	0.875445	1.58542	1.54313	8.9637	3.66363	0.706604	3.89756	4.5798	11.9166	8.68464	1.59055	4.95751	NaN	2.11922	2.97218	-0.054435	1.84368
A.pop	21	5.00104	5.61512	NaN	2.36164	0.665597	9.46703	NaN	0.532525	0.211433	6.61382	2.75796	6.7245	3.57468	1.37282	4.82031	0.66868	4.51839	5.85591	0.6042	2.53998	8.37415	NaN	6.03134	NaN	6.68813	5.775	7.9984	7.05573	NaN	2.00028	4.21194	0.50802	0.2535	1.53145	8.62833	2.00466	0.636128	3.41041	3.64035	12.1138	8.78706	0.670991	6.21074	0.539839	NaN	1.26002	NaN	0.320027
A.pop	35	0.977545	4.93957	1.49313	1.70505	NaN	7.58523	1.28517	0.432262	0.602916	5.71345	6.73586	9.6479	5.57534	3.58118	5.36399	1.74911	5.36393	7.23201	1.41669	3.42426	8.26244	0.874542	7.07174	NaN	3.8298	6.82756	8.40828	8.10069	-0.000183364	2.05458	5.58048	NaN	2.46768	0.866275	8.90459	3.26111	0.383712	4.35443	3.1255	11.5627	8.42852	1.60874	3.9331	NaN	1.3969	1.97879	NaN	2.31123
A.pop	37	1.65038	6.95778	NaN	2.48341	NaN	10.5647	0.352288	0.702063	0.906645	6.77926	4.8561	7.25571	5.33622	3.6063	5.77655	2.18367	6.03446	7.0322	1.01798	3.98114	8.52034	1.29036	5.64833	0.420035	4.92967	5.20557	7.23568	8.43055	-0.884546	3.17401	4.92352	NaN	1.7361	2.59266	8.92443	3.45156	0.657333	4.73745	3.73342	12.2846	8.94039	1.03038	5.96767	NaN	1.15068	2.1502	NaN	0.961883
A.pop	25	2.49768	6.16977	NaN	2.45146	0.699803	9.20737	0.466068	0.511765	0.54958	6.2756	5.55014	6.64888	4.7389	2.84577	5.31295	2.0416	4.81092	6.66981	0.635156	3.11814	7.90447	0.638795	6.13306	0.209067	4.30971	5.46573	7.8401	8.62475	NaN	2.26074	6.89703	NaN	0.810575	1.13539	8.85412	3.35812	0.49987	4.20343	3.11563	11.6111	8.5555	1.15162	4.79658	NaN	0.784569	3.29111	NaN	0.458079
A.pop	27	1.5671	5.46913	NaN	2.58913	NaN	8.54594	0.353674	0.550785	0.782277	5.91305	6.16863	8.7203	5.48898	3.42403	5.96163	2.27919	4.6902	7.72733	0.977507	3.75206	7.72859	1.37655	6.92018	NaN	4.23777	8.42294	8.13728	8.70892	NaN	2.53619	6.93343	0.628095	1.43574	1.7931	8.87149	3.88102	NaN	5.58884	3.69719	12.7216	8.59745	1.76667	5.56742	NaN	1.01813	3.58778	NaN	0.982423
A.pop	28	4.60773	6.23732	NaN	2.15775	NaN	10.5206	0.396535	0.891952	0.767435	6.87391	3.84216	6.39682	4.08353	2.97321	5.5916	1.70542	5.72432	6.34675	1.22879	3.13028	8.50459	0.826025	5.12526	NaN	5.64858	5.43936	8.09099	7.98987	NaN	2.59031	4.80809	0.528728	1.56102	1.97285	8.91631	3.30455	0.442328	4.01217	3.22328	11.9878	8.82618	0.705677	5.25026	0.406732	1.68301	1.49874	NaN	0.310929
PAA	29	1.85158	5.13147	0.681516	2.50917	NaN	8.76855	0.391923	NaN	0.662687	5.41319	6.18964	9.60857	5.16038	2.72644	5.20459	1.82477	4.92169	6.5975	0.614966	3.17266	8.11833	1.06961	6.13512	NaN	3.77797	8.51236	7.72644	8.1244	NaN	2.08934	5.26121	NaN	1.54892	1.16794	8.9306	2.28206	NaN	4.09632	2.40796	11.7211	8.5975	1.05142	3.80978	NaN	1.06934	2.11924	NaN	1.30192
PAA	30	2.81849	6.14756	NaN	2.61722	NaN	8.81666	0.404067	0.421252	0.640021	5.78584	5.35396	8.25338	4.28938	3.10098	5.08347	1.89516	5.34415	6.60836	1.45677	3.01765	7.64986	0.766078	5.62131	0.629892	4.15239	7.4103	7.69318	8.35053	NaN	2.12305	5.63017	0.596222	2.52374	2.52404	8.89204	3.4698	0.880272	4.73115	4.95449	11.5485	8.65384	1.07536	5.21301	NaN	1.81455	2.84803	NaN	2.05872
PAA	31	1.59221	5.78576	NaN	2.5763	NaN	8.82772	0.59865	1.06569	1.16541	6.90609	6.97957	7.99023	5.83125	4.12183	5.94501	2.83263	5.41575	7.8002	1.2915	3.74965	8.5848	1.59506	6.50746	NaN	4.92803	7.46689	8.2184	8.95348	NaN	2.76112	7.00975	0.677299	2.11941	1.63151	8.91556	3.07419	0.950427	5.2066	3.85188	11.8822	8.59905	2.15593	4.85626	0.444394	1.62275	2.88113	-0.0535139	1.5939
PAA	32	1.09985	4.97845	NaN	2.36393	NaN	8.25303	0.846457	0.593307	0.730075	6.13679	6.49386	7.43067	4.99886	3.20843	5.55636	2.2118	4.72396	6.89346	1.20593	3.21691	7.68143	0.846631	5.54115	NaN	4.01668	7.21977	7.84528	8.82707	NaN	2.35136	6.29501	0.782448	2.13418	1.14499	8.94578	2.48349	0.924803	4.22888	3.2392	11.7117	8.43451	1.48401	3.83343	NaN	1.67167	3.23998	NaN	1.94255
PAA	33	0.975452	5.28948	NaN	1.58341	NaN	7.57131	1.56515	0.633888	0.356339	5.21524	4.80903	9.88454	4.27879	2.97918	5.60121	1.76113	3.93177	6.94256	0.929093	3.36892	6.99837	0.7515	5.63939	NaN	4.3064	7.47036	7.236	8.33352	-0.838457	2.22547	5.3693	0.682417	2.04572	0.879301	8.90533	1.69939	NaN	4.72984	3.51486	12.6837	8.23468	0.835545	5.14572	NaN	2.38664	1.47719	NaN	1.263
PAA	34	1.36635	4.94281	0.976885	1.84369	NaN	8.43888	1.45616	0.772005	0.880799	5.72348	6.82374	9.54675	5.68439	3.22253	5.48731	1.87436	5.00906	7.1894	1.13607	3.57666	8.74261	1.22849	6.80131	NaN	3.96514	8.38709	8.00026	8.33793	-0.184993	2.3102	5.47825	0.66089	2.58479	0.982263	8.88893	3.44972	0.486191	4.83176	3.44219	12.2699	8.40506	1.62496	4.50547	NaN	1.61607	2.28033	NaN	2.3403
PAA	38	0.866742	4.99213	NaN	3.59224	0.768464	8.98489	0.301622	1.28123	0.949664	6.78668	6.54201	7.63418	5.42126	4.18668	5.83472	3.21051	5.00746	7.4539	1.77531	4.05681	8.18004	1.31298	6.41288	0.357424	4.6031	6.96806	8.69512	8.72973	-0.732793	2.7001	8.66777	0.761617	2.02959	1.58534	8.76009	2.94721	0.440233	5.22822	1.67986	11.065	8.78415	2.03976	4.74228	NaN	2.90517	0.911354	-0.0191582	2.09092
PAA	39	4.4546	5.82651	NaN	2.78463	0.668805	8.80417	0.362257	0.420282	0.437637	6.16391	5.81843	8.20364	4.78105	3.08382	5.38413	2.11456	5.61292	6.93443	1.19383	3.15237	8.24611	0.989912	5.94824	NaN	3.9585	6.5016	8.19201	8.62605	NaN	2.1274	6.99983	0.598305	2.06142	2.14421	8.82101	3.43334	0.452709	4.4048	1.65304	11.2459	8.64737	1.05788	3.85927	NaN	1.98391	1.53903	NaN	1.44353
PAA	40	1.96376	5.12441	NaN	2.58748	NaN	7.03536	0.83289	0.870352	0.349217	5.63541	4.96841	7.60633	4.45106	2.63015	5.49831	2.16389	4.25004	6.34536	1.08922	3.23607	7.16322	0.752211	5.80901	NaN	4.17791	6.05576	7.30153	8.27135	NaN	2.28201	5.81415	NaN	1.51453	1.2913	8.8052	2.69217	NaN	4.53367	1.72815	11.3292	8.53726	0.916133	5.18418	NaN	1.13787	2.11076	NaN	1.25412
PAA	41	2.5694	6.95055	NaN	5.81509	NaN	7.71512	0.358241	NaN	0.502212	7.64535	4.59252	5.67591	3.86665	3.45521	5.30108	2.05288	4.85932	6.62642	2.56489	2.8245	6.60994	NaN	7.66701	0.228788	4.05134	6.8079	8.77385	8.27839	-0.654562	1.93493	5.00598	NaN	1.54221	3.44979	8.81066	4.29625	0.670682	5.02005	3.04566	12.4315	8.51885	1.65124	5.38769	NaN	1.15359	1.49314	NaN	0.959884
PAA	42	1.8337	6.24763	0.479443	2.64096	NaN	7.42359	NaN	NaN	0.356042	6.76534	3.83297	8.89175	2.38262	2.67059	4.38676	0.866173	3.38449	5.27648	1.46943	2.49234	7.4841	NaN	6.60829	0.668766	4.24026	7.36471	9.18979	7.85874	NaN	1.69756	4.64263	0.952207	0.158899	1.23403	8.44144	3.28463	0.60297	3.57477	2.77532	11.3731	8.19948	0.961983	4.62675	0.51938	0.820843	3.08165	NaN	1.47541
PAA	43	5.72109	6.23431	NaN	3.47149	NaN	9.40484	NaN	NaN	0.244726	6.59449	3.48075	7.93921	2.69747	2.00837	4.38177	1.00013	4.90334	5.07263	0.907041	2.32711	8.03776	NaN	7.40735	0.323132	4.97113	5.80122	8.13067	7.97143	-0.878999	1.8374	4.44511	NaN	0.276684	1.54857	8.6584	2.69351	0.68383	4.39712	4.4351	11.5908	8.66411	0.386578	4.17115	0.309248	1.01262	2.43155	NaN	0.904839
PAA	44	1.33628	4.17881	0.83877	2.07798	NaN	8.84998	1.36721	0.904605	0.784572	5.48203	4.5291	10.2008	5.02459	3.33543	5.92258	1.44167	4.9363	7.65188	1.92161	4.2392	8.98452	0.909581	5.35416	NaN	4.45178	8.14787	8.70146	8.45028	-0.358405	2.49638	4.68673	0.998109	2.85137	1.17356	8.94674	2.45091	0.602361	6.02348	2.3452	12.7465	8.26175	0.715402	5.24317	NaN	0.996409	1.14265	-0.0718724	3.42797
PAA	45	0.681783	5.12636	0.576591	2.46453	NaN	7.0216	0.789789	0.413957	0.399868	5.35299	6.10898	9.24705	4.08244	3.08141	5.35106	1.64266	4.45898	6.95048	1.91533	3.47912	8.65417	1.2347	5.62438	NaN	2.81035	8.36776	8.72118	8.62952	-0.0760096	2.22571	5.60945	NaN	2.33902	1.42279	8.91112	2.05461	NaN	4.51338	3.49319	12.2275	8.23411	1.06127	3.30657	NaN	1.76102	1.53063	NaN	2.91478
PAA	36	0.884772	5.46218	NaN	2.59628	0.766738	9.11402	0.311354	1.37934	1.20857	6.77905	5.87697	7.06554	5.3835	3.24219	6.10631	2.01547	4.71371	7.54469	1.42419	4.44641	7.27433	1.68426	6.01054	NaN	5.3333	6.20627	7.71312	8.80324	NaN	3.16428	5.44996	NaN	1.74983	3.29923	9.01556	3.67929	NaN	5.61399	3.47584	12.0158	8.88096	1.31156	5.77647	0.644315	1.20231	3.14702	NaN	1.01563
PAA	18	1.93878	5.81154	0.436114	5.00583	0.701948	6.56805	0.82561	NaN	0.807747	7.63434	6.63836	5.68136	4.57095	4.11859	5.49272	2.41221	4.38149	6.93975	3.47264	2.43951	7.10904	0.670015	7.84195	NaN	2.82249	7.8465	9.0995	8.80267	NaN	1.59933	5.79956	0.929482	2.78224	1.20702	8.79382	3.0482	0.459333	4.27433	5.22753	10.5403	8.53679	2.31567	3.41062	0.324609	2.30845	5.63495	NaN	3.59874
	#MissDataFreq(%)	1,15%	0%	43,68%	32,18%	60,92%	0%	56,32%	32,18%	1,15%	0%	0%	0%	0%	0%	0%	0%	0%	0%	32,18%	0%	0%	19,54%	27,59%	63,22%	0%	0%	0%	0%	71,26%	0%	1,15%	55,17%	25,29%	0%	0%	22,99%	33,33%	0%	27,59%	0%	0%	3,45%	0%	72,41%	31,03%	2,30%	88,51%	32,18%
	#LOD-Chip1	0.156062	-0.0569721	0.426964	0.343505	0.652825	0.432758	0.250169	0.343374	0.165779	0.247271	-0.200133	0.38659	0.549872	-0.0547815	-0.194038	0.344395	0.477556	0.683981	0.016857	0.338818	-0.0248963	0.560084	0.245333	0.185994	0.464059	0.823243	1.13764	0.0327197	-0.953888	0.318364	0.846682	0.507107	-1.2849	-0.574951	-0.261671	0.14341	0.382318	0.279781	0.285601	0.868734	-0.41925	0.156691	0.22966	0.132452	0.583306	0.817385	-0.0878664	-0.0599606
[truncated: 138 more columns]
